# Supplementary material for: Synthesis of enones, pyrazolines and pyrrolines with gem-difluoroalkyl side chains
Source: publisher site journal article supplement (doi:10.3762/bjoc.9.230), 2013-09-26

**Supporting Information**  
**for**  
**Synthesis of enones, pyrazolines and pyrrolines with *gem*-**  
**difluoroalkyl side chains**

Assaad Nasr El Dine<sup>1,2</sup>, Ali Khalaf<sup>1,2</sup>, Danielle Grée<sup>1</sup>, Olivier Tasseau<sup>1</sup>,  
Fares Fares<sup>2</sup>, Nada Jaber<sup>2</sup>, Philippe Lesot<sup>3</sup>, Ali Hachem<sup>\*2</sup> and René Grée<sup>\*1</sup>

Address: <sup>1</sup>Université de Rennes 1, Institut des Sciences Chimiques de Rennes, CNRS UMR 6226, Avenue du Général Leclerc, 35042 Rennes Cedex, France, <sup>2</sup>Laboratory for Medicinal Chemistry and Natural Products, Lebanese University, Faculty of Sciences (1) and PRASE-EDST, Hadath, Beyrouth, Lebanon and <sup>3</sup>RMN en Milieu Orienté, ICMMO, CNRS UMR 8182, Université de Paris Sud, 91405 Orsay cedex, France

Email: René Grée\* - [rene.gree@univ-rennes1.fr](mailto:rene.gree@univ-rennes1.fr); Ali Hachem\* - [ahachem@ul.edu.lb](mailto:ahachem@ul.edu.lb)

\*Corresponding author

**Experimental details, NMR analysis and characterization data of new  
compounds**

|                                                                                                                                                    |     |
|----------------------------------------------------------------------------------------------------------------------------------------------------|-----|
| General Methods .....                                                                                                                              | S4  |
| 1. General procedure for the synthesis of difluoropropargylic alcohols ( <b>2</b> ).....                                                           | S4  |
| 1.1. Synthesis of 4,4-difluoro-1-phenyl-tridec-2-yn-1-ol ((±)- <b>2a</b> ) .....                                                                   | S5  |
| 1.2. Synthesis of 4,4-difluoro-1-(pyridine-3-yl)-tridec-2-yn-1-ol ((±)- <b>2b</b> ) .....                                                          | S5  |
| 1.3. Synthesis of 4,4-difluoro-1-(furan-2-yl)-tridec-2-yn-1-ol ((±)- <b>2c</b> ).....                                                              | S5  |
| 1.4. Synthesis of 4,4-difluoro-1-(thiophene-2-yl)-tridec-2-yn-1-ol ((±)- <b>2d</b> ).....                                                          | S6  |
| 1.5. Synthesis of 1-(4-bromophenyl)-4,4-difluoro-tridec-2-yn-1-ol ((±)- <b>2e</b> ) .....                                                          | S6  |
| 2. General procedure for the synthesis of <i>gem</i> -difluoroenones ( <b>3</b> ) .....                                                            | S7  |
| 2.1. Synthesis of 4,4-difluoro-1-phenyl-tridec-2-en-1-one ( <b>3a</b> ).....                                                                       | S7  |
| 2.2. Synthesis of 4,4-difluoro-1-(pyridine-3-yl)-tridec-2-en-1-one ( <b>3b</b> ) .....                                                             | S7  |
| 2.3. Synthesis of 4,4-difluoro-1-(furan-2-yl)-tridec-2-en-1-one ( <b>3c</b> ) .....                                                                | S8  |
| 2.4. Synthesis of 4,4-difluoro-1-(thiophene-2-yl)-tridec-2-en-1-one ( <b>3d</b> ) .....                                                            | S8  |
| 2.5. Synthesis of 1-(4-bromophenyl)-4,4-difluoro-tridec-2-en-1-one ( <b>3e</b> ).....                                                              | S9  |
| 3. General procedure for the synthesis of pyrazolines ( <b>4</b> ).....                                                                            | S9  |
| 3.1. Synthesis of 5-(1,1-difluorodecyl)-1-methyl-3-phenyl-4,5-dihydro-<br>1 <i>H</i> -pyrazole ((±)- <b>4a</b> ) .....                             | S9  |
| 3.2. Synthesis 3-[5-(1,1-difluorodecyl)-1-methyl-4,5-dihydro-1 <i>H</i> -pyrazole-<br>3-yl]pyridine ((±)- <b>4b</b> ).....                         | S10 |
| 3.3. Synthesis of 5-(1,1-difluorodecyl)-3-furan-2-yl-1-methyl-4,5-dihydro-<br>1 <i>H</i> -pyrazole ((±)- <b>4c</b> ) .....                         | S10 |
| 3.4. Synthesis of 5-(1,1-difluorodecyl)-1-methyl-3-(thiophen-2-yl)-4,5-dihydro-<br>1 <i>H</i> -pyrazole ((±)- <b>4d</b> ).....                     | S11 |
| 3.5. Synthesis of 3-(4-bromophenyl)-5-(1,1-difluorodecyl)-1-methyl-4,5-dihydro-<br>1 <i>H</i> -pyrazole ((±)- <b>4e</b> ) .....                    | S12 |
| 4. General procedure for the synthesis of pyrrolines ( <b>6</b> ) .....                                                                            | S13 |
| 4.1. Synthesis of 3-(1,1-difluorodecyl)-5-phenyl-3,4-dihydro-2 <i>H</i> -pyrrole-2-carboxylic acid<br>ethyl ester ((±)- <b>6a</b> ).....           | S13 |
| 4.2. Synthesis of 3-(1,1-Difluorodecyl)-5-(pyridin-3-yl)-3,4-dihydro-2 <i>H</i> -pyrrole-2-carboxylic acid<br>ethyl ester ((±)- <b>6b</b> ) .....  | S13 |
| 4.3. Synthesis of 3-(1,1-difluorodecyl)-5-(furan-2-yl)-3,4-dihydro-2 <i>H</i> -pyrrole-2-carboxylic acid<br>ethyl ester ((±)- <b>6c</b> ).....     | S14 |
| 4.4. Synthesis of 3-(1,1-difluorodecyl)-5-(thiophen-2-yl)-3,4-dihydro-2 <i>H</i> -pyrrole-2-carboxylic acid<br>ethyl ester ((±)- <b>6d</b> ) ..... | S15 |
| 4.5. Synthesis of 5-(4-bromophenyl)-3-(1,1-difluorodecyl)-3,4-dihydro-2 <i>H</i> -pyrrole-2-carboxylic acid<br>ethyl ester ((±)- <b>6e</b> ).....  | S15 |

|                                                                                                                                                                       |     |
|-----------------------------------------------------------------------------------------------------------------------------------------------------------------------|-----|
| 5. General procedure for the Suzuki–Miyaura reaction .....                                                                                                            | S16 |
| 5.1. Synthesis of 3-biphenyl-4-yl-5-(1,1-difluorodecyl)-1-methyl-4,5-dihydro-1 <i>H</i> -pyrazole ((±)- <b>7e</b> ) .....                                             | S16 |
| 5.2. Synthesis of 5-biphenyl-4-yl-3-(1,1-difluorodecyl)-3,4-dihydro-2 <i>H</i> -pyrrole-2-carboxylic acid ethyl ester ((±)- <b>10e</b> ) .....                        | S16 |
| 6. General procedure for the Heck reaction.....                                                                                                                       | S17 |
| 6.1. Synthesis of 3-{4-[5-(1,1-difluorodecyl)-1-methyl-4,5-dihydro-1 <i>H</i> -pyrazol-3-yl]-phenyl}-acrylic acid methyl ester ((±)- <b>8e</b> ) .....                | S17 |
| 6.2. Synthesis of 3-(1,1-difluorodecyl)-5-[4-(2-methoxycarbonyl-vinyl)-phenyl]-3,4-dihydro-2 <i>H</i> -pyrrole-2-carboxylic acid ethyl ester ((±)- <b>11e</b> ) ..... | S18 |
| 7. General procedure for the Sonogashira reaction .....                                                                                                               | S18 |
| 7.1. Synthesis of 5-(1,1-difluorodecyl)-1-methyl-3-(4-phenylethynyl-phenyl)-4,5-dihydro-1 <i>H</i> -pyrazole ((±)- <b>9e</b> ) .....                                  | S18 |
| 7.2. Synthesis of 3-(1,1-difluorodecyl)-5-(4-phenylethynyl-phenyl)-3,4-dihydro-2 <i>H</i> -pyrrole-2-carboxylic acid ethyl ester ((±)- <b>12e</b> ) .....             | S19 |
| 8. Analysis of <sup>19</sup> F/ <sup>1</sup> H HOESY 2D-NMR spectrum of (±)- <b>6a</b> .....                                                                          | S20 |
| 9. Library of <sup>1</sup> H, <sup>13</sup> C-{ <sup>1</sup> H}, <sup>19</sup> F-{ <sup>1</sup> H} and <sup>19</sup> F 1D-NMR spectra .....                           | S21 |

*Note: all compounds 2 and 4–12 are prepared in racemic form only.*

## General Methods

All reagents were obtained commercially and used without further purification. All reactions were carried out under a nitrogen atmosphere and dry conditions. The solvents used were freshly distilled under anhydrous conditions, unless otherwise specified. The reaction mixtures were magnetically stirred with Teflon stirring bars, and the temperatures were measured externally. Reactions that required anhydrous conditions were carried out by using oven dried (120 °C, 24 h) glassware. Yields refer to chromatographically and spectroscopically ( $^1\text{H}$ ,  $^{13}\text{C}$ , and  $^{19}\text{F}$  NMR) homogeneous materials. Reactions were monitored by  $^{19}\text{F}$  NMR and by thin-layer chromatography (TLC), carried out on 0.25 mm Merck silica gel plates (60 F254) with detection by UV light or staining with *p*-anisaldehyde. The eluents used were mixtures of pentane (Pent) and ether ( $\text{Et}_2\text{O}$ ). Acros silica gel (60, particle size 0.040–0.063 mm) was used for column chromatography. Nuclear magnetic resonance (NMR) spectra have been recorded with Bruker Avance 500, 400 and 300 spectrometers.  $^1\text{H}$  NMR spectra:  $\delta$  (H) are given in ppm relative to tetramethylsilane (TMS), using [ $\delta$  ( $\text{CHCl}_3$ ) = 7.26 ppm] as internal reference.  $^{13}\text{C}$  NMR spectra:  $\delta$  (C) are given in ppm relative to TMS, using [ $\delta$  ( $\text{CDCl}_3$ ) = 77.0 ppm] as internal reference.  $^{19}\text{F}$  NMR spectra:  $\delta$  (F) are given in ppm relative to  $\text{CFCl}_3$  = 0.0 ppm as external reference. Multiplicities were designated as singlet (s), doublet (d), triplet (t), quadruplet (q), quintuplet (qt), multiplet (m) or br (broad). Mass spectral analyses have been performed at the Centre Régional de Mesures Physiques de l'Ouest (CRMPO) in Rennes (France).

### 1. General procedure for the synthesis of difluoropropargylic alcohols (2)

To a solution of propargylic *gem*-difluoro intermediate **1** (1 equiv) in anhydrous THF (2 ml per mmol) cooled at  $-78\text{ }^\circ\text{C}$ , was added, dropwise under nitrogen, a solution of *n*-BuLi in hexanes (1.2 equiv). The mixture was stirred for 1 h at  $T \leq -40\text{ }^\circ\text{C}$ . Then the aldehyde (1.2 equiv) in anhydrous THF (1 ml per mmol) was added at  $-78\text{ }^\circ\text{C}$  and the resulting solution was allowed to warm to room temperature over 2 h. The mixture was treated with saturated ammonium chloride solution and extracted with ether (3 x 10 ml). The combined organic phases were washed with water, dried over  $\text{MgSO}_4$  and concentrated in vacuo. The crude product is purified by chromatography on silica gel, using a mixture of ether/pentane as eluent.

### 1.1. Synthesis of 4,4-difluoro-1-phenyl-tridec-2-yn-1-ol ((±)-2a)

The reaction was performed with **1** (990 mg, 4.90 mmol) and benzaldehyde (0.6 ml, 9.8 mmol), according to the general procedure. After purification by chromatography on silica gel, propargylic alcohol **2a** was obtained as a yellow oil (1.30 g, 82% yield).  $R_f = 0.38$  (Et<sub>2</sub>O/pentane 1/9). <sup>1</sup>H NMR (CDCl<sub>3</sub>, 300 MHz),  $\delta$  ppm: 7.54-7.41 (m, 2H); 7.38-7.27 (m, 3H); 5.47 (t, 1H, <sup>5</sup> $J_{HF} = 3.9$  Hz); 2.19 (bs, 1H); 2.13-1.97 (m, 2H); 1.60-1.52 (m, 2H); 1.30-1.27 (m, 12H); 0.89 (t, 3H,  $J = 6.7$  Hz). <sup>13</sup>C NMR (CDCl<sub>3</sub>, 75 MHz),  $\delta$  ppm: 139.0 (t, <sup>5</sup> $J_{CF} = 1.4$  Hz); 128.9 (2C); 126.6 (2C); 114.9 (t, <sup>1</sup> $J_{CF} = 232.8$  Hz); 86.3 (t, <sup>3</sup> $J_{CF} = 6.7$  Hz); 79.7 (t, <sup>2</sup> $J_{CF} = 41.2$  Hz); 64.3 (t, <sup>4</sup> $J_{CF} = 1.9$  Hz); 39.5 (t, <sup>2</sup> $J_{CF} = 25.7$  Hz); 31.9; 29.4; 29.32; 29.26; 28.9; 22.7 (t, <sup>3</sup> $J_{CF} = 3.5$  Hz); 22.7; 14.1. <sup>19</sup>F NMR (CDCl<sub>3</sub>, 282 MHz),  $\delta$  ppm: -83.10 (td,  $J_{FH} = 15.0$  Hz, 3.9 Hz). HRMS (ESI) calcd for C<sub>19</sub>H<sub>26</sub>F<sub>2</sub>O<sup>79</sup>BrNa: [M + Na]<sup>+</sup> :  $m/z$  331.19518. Found:  $m/z$  331.1953 (1ppm).

### 1.2. Synthesis of 4,4-difluoro-1-(pyridine-3-yl)-tridec-2-yn-1-ol ((±)-2b)

The reaction was performed with **1** (400 mg, 1.29 mmol) and 3-pyridinecarboxaldehyde (0.22 ml, 2.38 mmol), according to the general procedure. After purification by chromatography on silica gel, propargylic alcohol **2b** was obtained as a yellow oil (472 mg, 78% yield).  $R_f = 0.29$  (Et<sub>2</sub>O/pentane 7/3). <sup>1</sup>H NMR (CDCl<sub>3</sub>, 300 MHz),  $\delta$  ppm: 8.66 (s, 1H); 8.54 (d, 1H,  $J = 4.4$  Hz); 7.92 (d, 1H,  $J = 7.4$  Hz); 7.38 (dd, 1H,  $J = 7.4$  Hz,  $J = 4.4$  Hz); 5.62 (t, 1H, <sup>5</sup> $J_{HF} = 3.8$  Hz); 3.80 (bs, 1H); 2.13-1.92 (m, 2H); 1.61-1.43 (m, 2H); 1.16-1.45 (m, 12H); 0.88 (t, H<sub>1</sub>,  $J = 6.6$  Hz). <sup>13</sup>C NMR (CDCl<sub>3</sub>, 75 MHz),  $\delta$  ppm: 148.6; 147.3; 136.3; 135.2; 123.9; 114.8 (t, <sup>1</sup> $J_{CF} = 232.9$  Hz); 86.1 (t, <sup>3</sup> $J_{CF} = 6.8$  Hz); 79.6 (t, <sup>2</sup> $J_{CF} = 41.2$  Hz); 61.3; 39.1 (t, <sup>2</sup> $J_{CF} = 25.7$  Hz); 31.8; 29.4; 29.3; 29.2; 28.9; 22.7 (t, <sup>3</sup> $J_{CF} = 3.4$  Hz); 22.7; 14.1. <sup>19</sup>F NMR (CDCl<sub>3</sub>, 282 MHz),  $\delta$  ppm: -83.23 (td,  $J_{FH} = 15.3$  Hz, 3.8 Hz). HRMS (ESI) calcd for C<sub>22</sub>H<sub>32</sub>NOF<sub>2</sub><sup>79</sup>BrNa: [M + Na]<sup>+</sup> :  $m/z$  332.18019. Found:  $m/z$  332.1812 (3 ppm).

### 1.3. Synthesis of 4,4-difluoro-1-(furane-2-yl)-tridec-2-yn-1-ol ((±)-2c)

The reaction was performed with **1** (400 mg, 1.29 mmol) and furane-2-carbaldehyde (0.2 ml, 2.38 mmol), according to the general procedure. After purification by chromatography on silica gel, propargylic alcohol **2c** was obtained as a yellow oil (463 mg, 79% yield).  $R_f = 0.46$  (Et<sub>2</sub>O/pentane 2/8). <sup>1</sup>H NMR (CDCl<sub>3</sub>, 300 MHz),  $\delta$  ppm: 7.44 (dd, 1H,  $J = 1.8$  Hz,  $J = 0.8$

Hz); 6.47 (dt, 1H,  $J = 3.3$  Hz,  $J = 0.7$  Hz); 6.38 (dd, 1H,  $J = 3.3$  Hz,  $J = 1.8$  Hz); 5.54 (t, 1H,  $^5J_{HF} = 3.8$  Hz); 2.47 (bs, 1H); 2.19-1.98 (m, 2H); 1.61-1.42 (m, 2H); 1.15-1.34 (m, 12H); 0.88 (t,  $H_1$ ,  $J = 6.3$  Hz).  $^{13}\text{C}$  NMR ( $\text{CDCl}_3$ , 75 MHz),  $\delta$  ppm: 151.4 (t,  $^5J_{CF} = 2.0$  Hz); 143.4; 114.8 (t,  $^1J_{CF} = 233.1$  Hz); 110.6; 108.4; 83.9 (t,  $^3J_{CF} = 6.7$  Hz); 78.8 (t,  $^2J_{CF} = 41.4$  Hz); 57.8 (t,  $^4J_{CF} = 1.8$  Hz); 39.1 (t,  $^2J_{CF} = 25.6$  Hz); 31.8; 29.4; 29.30; 29.2; 28.9; 22.7 (t,  $^3J_{CF} = 3.5$  Hz); 22.7; 14.1.  $^{19}\text{F}$  NMR ( $\text{CDCl}_3$ , 282 MHz),  $\delta$  ppm: -83.51 (td,  $J_{FH} = 15.2$  Hz, 3.8 Hz). HRMS (ESI) calcd for  $\text{C}_{17}\text{H}_{24}\text{O}_2\text{F}_2^{79}\text{BrNa}$ :  $[\text{M} + \text{Na}]^+$ :  $m/z$  321.16421. Found:  $m/z$  321.1641 (0 ppm).

#### 1.4. Synthesis of 4,4-difluoro-1-(thiophene-2-yl)-tridec-2-yn-1-ol ((±)-2d)

The reaction was performed with **1** (877 mg, 4.34 mmol) and thiophene-2-carbaldehyde (0.47 ml, 5.21 mmol), according to the general procedure. After purification by chromatography on silica gel, propargylic alcohol **2d** was obtained as a yellow oil (966 mg, 71% yield).  $R_f = 0.43$  ( $\text{Et}_2\text{O}$ /pentane 2/8).  $^1\text{H}$  NMR ( $\text{CDCl}_3$ , 300 MHz),  $\delta$  ppm: 7.24 (dd, 1H,  $J = 5.1$  Hz,  $J = 1.2$  Hz); 7.18 (dt, 1H,  $J = 3.4$  Hz, 0.9 Hz); 6.38 (dd, 1H,  $J = 5.1$  Hz,  $J = 3.4$  Hz); 5.62 (bs, 1H); 2.72 (bs, 1H); 2.18-1.84 (m, 2H); 1.61-1.42 (m, 2H); 1.37-1.17 (m, 12H); 0.83 (t,  $H_1$ ,  $J = 6.7$  Hz).  $^{13}\text{C}$  NMR ( $\text{CDCl}_3$ , 75 MHz),  $\delta$  ppm: 142.7 (t,  $^5J_{CF} = 1.7$  Hz); 126.9; 126.6; 126.1; 114.9 (t,  $^1J_{CF} = 233.2$  Hz); 85.6 (t,  $^3J_{CF} = 6.7$  Hz); 79.1 (t,  $^2J_{CF} = 41.4$  Hz); 59.9 (t,  $^4J_{CF} = 1.8$  Hz); 39.1 (t,  $^2J_{CF} = 25.6$  Hz); 31.9; 29.4; 29.33; 29.27; 29.0; 22.7 (t,  $^3J_{CF} = 3.8$  Hz); 22.7; 14.1.  $^{19}\text{F}$  NMR ( $\text{CDCl}_3$ , 282 MHz),  $\delta$  ppm: -83.45 (td,  $J_{FH} = 15.0$  Hz, 3.8 Hz). HRMS (ESI) calcd for  $\text{C}_{17}\text{H}_{24}\text{OF}_2\text{S}^{79}\text{BrNa}$ :  $[\text{M} + \text{Na}]^+$ :  $m/z$  377.14136. Found:  $m/z$  377.1416 (1 ppm).

#### 1.5. Synthesis of 1-(4-bromophenyl)-4,4-difluoro-tridec-2-yn-1-ol ((±)-2e)

The reaction was performed with **1** (400 mg, 1.98 mmol) and 4-bromobenzaldehyde (0.44 mg, 2.376 mmol), according to the general procedure. After purification by chromatography on silica gel, propargylic alcohol **2e** was obtained as a yellow oil (614 mg, 81% yield).  $R_f = 0.34$  ( $\text{Et}_2\text{O}$ /pentane 1/9).  $^1\text{H}$  NMR ( $\text{CDCl}_3$ , 300 MHz),  $\delta$  ppm: 7.41-7.32 (m, 2H); 7.25-7.16 (m, 2H); 5.28 (t, 1H,  $^5J_{HF} = 3.7$  Hz); 2.46 (bs, 1H); 2.02-1.88 (m, 2H); 1.50-1.35 (m, 2H); 1.29-1.11 (m, 12H); 0.80 (t,  $H_1$ ,  $J = 6.4$  Hz).  $^{13}\text{C}$  NMR ( $\text{CDCl}_3$ , 75 MHz),  $\delta$  ppm: 138.0; 131.9; 128.3; 122.9; 114.8 (t,  $^1J_{CF} = 233.0$  Hz); 85.8 (t,  $^3J_{CF} = 6.7$  Hz); 79.9 (t,  $^2J_{CF} = 41.3$  Hz); 63.4 (t,  $^4J_{CF} = 1.8$  Hz); 39.1 (t,  $^2J_{CF} = 25.7$  Hz); 32.0; 29.43; 29.35; 29.30; 28.9; 22.7 (t,  $^3J_{CF} = 3.5$  Hz); 22.7; 14.1.  $^{19}\text{F}$  NMR ( $\text{CDCl}_3$ , 282 MHz),  $\delta$  ppm: -83.25 (td,  $J_{FH} = 15.1$  Hz, 3.7

Hz). HRMS (ESI) calcd for  $C_{19}H_{25}OF_2Br^{79}BrNa$ :  $[M + Na]^+ : m/z$  409.09545. Found:  $m/z$  409.0951 (2 ppm).

## 2. General procedure for the synthesis of *gem*-difluoroenones (3)

The difluoropropargylic alcohol **2** (1 equiv) was dissolved in THF (2 ml per mmol), then DBU (1.5 equiv) was added, and stirred at 35 °C for the appropriate time (monitored by  $^{19}F$  NMR). After completion of the reaction, the mixture was neutralized with a saturated solution of  $NH_4Cl$ . After extraction with diethyl ether, the organic phases were washed with water, dried ( $MgSO_4$ ) and concentrated in vacuo. The crude product was purified by chromatography on silica gel, using ether/pentane as eluent.

### 2.1. Synthesis of 4,4-difluoro-1-phenyl-tridec-2-en-1-one (3a)

The reaction was performed with **2a** (920 mg, 2.99 mmol) according to the general procedure. After 6 h,  $^{19}F$  NMR showed 100% conversion, and there were two enones, *cis* and *trans* (1/100). After purification by flash chromatography on silica gel, the enone **3a** was isolated as a yellow oil (570 mg, 62%).  $R_f$  = 0.30 ( $Et_2O$ /pentane 2/98).  $^1H$  NMR ( $CDCl_3$ , 400 MHz),  $\delta$  ppm: 8.02-7.94 (m, 2H); 7.66-7.57 (m, 1H); 7.55-7.46 (m, 2H); 7.31 (dt, 1H,  $J$  = 15.6 Hz,  $^4J_{HF}$  = 2.3 Hz); 6.85 (dt, 1H,  $J$  = 15.6 Hz,  $^3J_{HF}$  = 11.6 Hz); 2.08-1.91 (m, 2H); 1.51-1.43 (m, 2H); 1.41-1.17 (m, 12H); 0.88 (t, 3H,  $J$  = 6.7 Hz).  $^{13}C$  NMR ( $CDCl_3$ , 100 MHz),  $\delta$  ppm: 189.3; 138.9 (t,  $^2J_{CF}$  = 27.3 Hz); 133.6; 136.9; 128.8 (2C); 128.7 (2C); 127.40 (t,  $^3J_{CF}$  = 7.5 Hz); 121.3 (t,  $^1J_{CF}$  = 239.9 Hz); 37.3 (t,  $^2J_{CF}$  = 25.7 Hz); 31.8; 29.4; 29.3; 29.2 (2C); 22.7; 22.2 (t,  $^3J_{CF}$  = 4.1 Hz); 14.1.  $^{19}F$  NMR ( $CDCl_3$ , 282 MHz),  $\delta$  ppm: -98.36 (tdd,  $J_{FH}$  = 16.0 Hz, 11.6 Hz, 2.3 Hz). HRMS (ESI) calcd for  $C_{19}H_{26}F_2O^{79}BrNa$ :  $[M + Na]^+ : m/z$  331.19518. Found:  $m/z$  331.1952 (0 ppm).

### 2.2. Synthesis of 4,4-difluoro-1-(pyridine-3-yl)-tridec-1-en-one (3b)

The reaction was performed with **2b** (386 mg, 1.25 mmol) according to the general procedure. After 30 min,  $^{19}F$  NMR showed 100% conversion, and that a single product is formed. After purification by flash chromatography on silica gel, the enone **3b** was isolated as a sticky syrup (225 mg, 62%).  $R_f$  = 0.26 ( $Et_2O$ /pentane 3/7).  $^1H$  NMR ( $CDCl_3$ , 300 MHz),  $\delta$  ppm: 9.16 (dd, 1H,  $J$  = 2.1 Hz,  $J$  = 0.5 Hz); 8.80 (dd, 1H,  $J$  = 4.8 Hz,  $J$  = 1.6 Hz); 8.23 (ddd,

1H,  $J = 7.9$  Hz,  $J = 2.1$  Hz,  $J = 1.6$  Hz); 7.44 (ddd, 1H,  $J = 7.9$  Hz,  $J = 4.8$  Hz,  $J = 0.5$  Hz); 7.26 (dt, 1H,  $J = 15.5$  Hz,  $^4J_{HF} = 2.3$  Hz); 6.88 (dt, 1H,  $J = 15.5$  Hz,  $^3J_{HF} = 11.9$  Hz); 2.06-1.90 (m, 2H); 1.51-1.40 (m, 2H); 1.39-1.12 (m, 12H); 0.85 (t, 3H,  $J = 6.7$  Hz).  $^{13}\text{C}$  NMR ( $\text{CDCl}_3$ , 75 MHz),  $\delta$  ppm: 188.0; 153.8; 149.9; 140.0 (t,  $^2J_{CF} = 27.5$  Hz); 135.9; 132.1; 126.6 (t,  $^3J_{CF} = 7.5$  Hz); 123.7; 121.0 (t,  $^1J_{CF} = 239.9$  Hz); 37.1 (t,  $^2J_{CF} = 25.6$  Hz); 31.8; 29.3; 29.2; 29.1 (2C); 22.6; 22.1 (t,  $^3J_{CF} = 4.1$  Hz); 14.0.  $^{19}\text{F}$  NMR ( $\text{CDCl}_3$ , 282 MHz),  $\delta$  ppm: -98.63 (td,  $J_{FH} = 15.4$  Hz, 11.9 Hz). HRMS (ESI) calcd for  $\text{C}_{18}\text{H}_{25}\text{NOF}_2^{79}\text{BrNa}$ :  $[\text{M} + \text{Na}]^+$  :  $m/z$  332.18019 Found:  $m/z$  332.1814 (4 ppm).

### 2.3. Synthesis of 4,4-difluoro-1-(furane-2-yl)-tridec-2-en-1-one (3c)

The reaction was performed with **2c** (386 mg, 1.25 mmol) according to the general procedure. After 40 min,  $^{19}\text{F}$  NMR showed 100% conversion, and there were two enones, *cis* and *trans* (1/100). After purification by flash chromatography on silica gel, the enone **3c** was isolated as yellow oil (138 mg, 63%).  $R_f = 0.31$  ( $\text{Et}_2\text{O}$ /pentane 5/95).  $^1\text{H}$  NMR ( $\text{CDCl}_3$ , 300 MHz),  $\delta$  ppm: 7.67 (dd, 1H,  $J = 1.7$  Hz,  $J = 0.7$  Hz); 7.33 (dd, 1H,  $J = 3.7$  Hz,  $J = 0.7$  Hz); 7.18 (dt, 1H,  $J = 15.6$  Hz,  $^4J_{HF} = 2.2$  Hz); 6.92 (dt, 1H,  $J = 15.6$  Hz,  $^3J_{HF} = 11.5$  Hz); 6.59 (dd, 1H,  $J = 3.6$  Hz,  $J = 1.7$  Hz); 2.08-1.85 (m, 2H); 1.55-1.39 (m, 2H); 1.35-1.14 (m, 12H); 0.85 (t, 3H,  $J = 6.7$  Hz).  $^{13}\text{C}$  NMR ( $\text{CDCl}_3$ , 75 MHz),  $\delta$  ppm: 176.7; 152.9; 147.4; 138.4 (t,  $^2J_{CF} = 27.5$  Hz); 126.7 (t,  $^3J_{CF} = 7.6$  Hz); 121.2 (t,  $^1J_{CF} = 239.7$  Hz); 119.0; 112.8; 37.24 (t,  $^2J_{CF} = 25.7$  Hz); 31.82; 29.37; 29.3; 29.2 (2C); 22.6; 22.1 (t,  $^3J_{CF} = 4.1$  Hz); 14.1.  $^{19}\text{F}$  NMR ( $\text{CDCl}_3$ , 282 MHz),  $\delta$  ppm: -98.48 (tdd,  $J_{FH} = 16.1$  Hz, 11.5 Hz, 2.1 Hz). HRMS (ESI) calcd for  $\text{C}_{17}\text{H}_{24}\text{O}_2\text{F}_2^{79}\text{BrNa}$ :  $[\text{M} + \text{Na}]^+$  :  $m/z$  321.16421. Found:  $m/z$  321.1640 (1 ppm).

### 2.4. Synthesis of 4,4-difluoro-1-(thiophene-2-yl)-tridec-2-en-1-one (3d)

The reaction was performed with **2d** (730 mg, 2.32 mmol) according to the general procedure. After 1 h,  $^{19}\text{F}$  NMR showed 100% conversion, and there were two enones, *cis* and *trans* (1/100). After purification by flash chromatography on silica gel, the enone **3c** was isolated as a yellow oil (437 mg, 60%).  $R_f = 0.24$  ( $\text{Et}_2\text{O}$ /pentane 2/98).  $^1\text{H}$  NMR ( $\text{CDCl}_3$ , 300 MHz),  $\delta$  ppm: 7.83 (dd, 1H,  $J = 3.9$  Hz,  $J = 1.1$  Hz); 7.73 (dd, 1H,  $J = 5.0$  Hz,  $J = 1.1$  Hz); 7.19 (dt, 1H,  $J = 15.4$  Hz,  $^4J_{HF} = 2.3$  Hz); 7.18 (dd, 1H,  $J = 5.0$  Hz,  $J = 3.9$  Hz); 6.89 (dt, 1H,  $J = 15.4$  Hz,  $^3J_{HF} = 11.6$  Hz); 2.09-1.90 (m, 2H); 1.52-1.43 (m, 2H); 1.38-1.18 (m, 12H); 0.87



(t, 3H,  $J = 6.2$  Hz).  $^{13}\text{C}$  NMR ( $\text{CDCl}_3$ , 75 MHz),  $\delta$  ppm: 181.0; 144.4; 138.4 (t,  $^2J_{\text{CF}} = 27.2$  Hz); 135.2; 133.0; 128.5; 127.1 (t,  $^3J_{\text{CF}} = 7.5$  Hz); 121.2 (t,  $^1J_{\text{CF}} = 239.7$  Hz); 37.3 (t,  $^2J_{\text{CF}} = 25.7$  Hz); 31.8; 29.4; 29.3; 29.2 (2C); 22.7; 22.1 (t,  $^3J_{\text{CF}} = 4.1$  Hz); 14.1.  $^{19}\text{F}$  NMR ( $\text{CDCl}_3$ , 282 MHz),  $\delta$  ppm: -98.45 (tdd,  $J_{\text{FH}} = 16.1$  Hz, 11.6 Hz, 2.3 Hz). HRMS (ESI) calcd for  $\text{C}_{17}\text{H}_{24}\text{OF}_2\text{S}^{79}\text{BrNa}$ :  $[\text{M} + \text{Na}]^+$  :  $m/z$  377.14136. Found:  $m/z$  377.1418 (1 ppm).

## 2.5. Synthesis of 1-(4-bromophenyl)-4,4-difluoro-tridec-2-en-1-one (3e)

The reaction was performed with **2e** (332 mg, 1.07 mmol) according to the general procedure. After 1 h,  $^{19}\text{F}$  NMR showed 100% conversion, and there were two enones, *cis* and *trans* (1/100). After purification by flash chromatography on silica gel, the enone **3c** was isolated as a sticky syrup (203 mg, 61%).  $R_f = 0.31$  (pentane).  $^1\text{H}$  NMR ( $\text{CDCl}_3$ , 300 MHz),  $\delta$  ppm: 7.86-7.62 (m, 4H); 7.26 (dt, 1H,  $J = 15.5$  Hz,  $^4J_{\text{HF}} = 2.3$  Hz); 6.86 (dt, 1H,  $J = 15.5$  Hz,  $^3J_{\text{HF}} = 11.5$  Hz); 2.07-1.89 (m, 2H); 1.53-1.41 (m, 2H,  $\text{H}_8$ ); 1.40-1.2 (m, 12H); 0.87 (t, 3H,  $J = 6.7$  Hz).  $^{13}\text{C}$  NMR ( $\text{CDCl}_3$ , 75 MHz),  $\delta$  ppm: 188.2; 139.5 (t,  $^2J_{\text{CF}} = 27.3$  Hz); 135.60; 132.2 (2C); 130.2 (2C); 128.9; 126.8 (t,  $^3J_{\text{CF}} = 7.5$  Hz); 121.1 (t,  $^1J_{\text{CF}} = 239.8$  Hz); 37.3 (t,  $^2J_{\text{CF}} = 25.7$  Hz); 31.9; 29.4; 29.3; 29.2 (2C); 22.7; 22.2 (t,  $^3J_{\text{CF}} = 4.1$  Hz); 14.1.  $^{19}\text{F}$  NMR ( $\text{CDCl}_3$ , 282 MHz),  $\delta$  ppm: -98.47 (td,  $J_{\text{FH}} = 16.1$  Hz, 11.5 Hz, 2.3 Hz). HRMS (ESI) calcd for  $\text{C}_{19}\text{H}_{25}\text{OF}_2\text{Br}^{79}\text{BrNa}$ :  $[\text{M} + \text{Na}]^+$  :  $m/z$  409.09545. Found:  $m/z$  409.0952 (1 ppm).

## 3. General procedure for the synthesis of pyrazolines (4)

The enone **3** (1 equiv) was dissolved in ethanol (2 ml per 1 mmol), then methylhydrazine (4 equiv) was added. The reaction mixture was stirred at 40 °C for the appropriate time (monitored by  $^{19}\text{F}$  NMR). After evaporation of ethanol, the crude product was crystallized and the pyrazoline **4** was purified by chromatography on silica gel, using ether/pentane as eluent.

### 3.1. Synthesis of 5-(1,1-difluorodecyl)-1-methyl-3-phenyl-4,5-dihydro-1H-pyrazole ((±)-**4a**)

The reaction was performed with **3a** (100 mg, 0.33 mmol) according to the general procedure. After 11.5 h,  $^{19}\text{F}$  NMR monitoring showed the absence of starting material. After purification by flash chromatography on silica gel, the pyrazoline **4a** was isolated as a sticky syrup (90 mg, 85%).  $R_f = 0.47$  (( $\text{Et}_2\text{O}$ /pentane 1/9).  $^1\text{H}$  NMR ( $\text{CDCl}_3$ , 400 MHz),  $\delta$  ppm: 7.72-7.62 (m, 2H); 7.34-7.33 (m, 3H); 3.54 (dddd, 1H,  $^3J_{\text{HF}} = 11.7$  Hz,  $J = 11.6$  Hz,  $J = 11.6$

Hz,  $^3J_{HF} = 7.4$  Hz); 3.36 (dd, 1H,  $J = 16.8$  Hz,  $J = 11.6$  Hz); 3.07 (dd, 1H,  $J = 16.8$  Hz,  $J = 11.6$  Hz); 2.99 (s, 3H); 2.05-1.82 (m, 2H); 1.62-1.54 (m, 2H); 1.38-1.22 (m, 12H); 0.89 (t, 3H,  $J = 6.7$  Hz).  $^{13}\text{C}$  NMR ( $\text{CDCl}_3$ , 100 MHz);  $\delta$  ppm: 149.3; 132.1; 128.9; 128.8 (2C); 127.1 (2C); 124.7 (t,  $^1J_{CF} = 251.9$  Hz); 71.19 (dd,  $^2J_{CF} = 27.5$  Hz,  $^2J_{CF} = 26.6$  Hz); 43.9; 35.8 (dd,  $^3J_{CF} = 5.3$  Hz,  $^3J_{CF} = 2.0$  Hz); 33.0 (t,  $^2J_{CF} = 24.2$  Hz); 31.9; 29.43; 29.40; 29.3; 22.7; 22.2 (t,  $^3J_{CF} = 4.2$  Hz); 14.1.  $^{19}\text{F}$  NMR ( $\text{CDCl}_3$ , 282 MHz),  $\delta$  ppm: -102.11 (dddd,  $J_{FF} = 250.6$  Hz,  $J_{FH} = 20.8$  Hz, 15.6 Hz, 11.7 Hz); -104.33 (dddd,  $J_{FF} = 250.6$  Hz,  $J_{FH} = 22.1$  Hz, 16.5 Hz, 7.4 Hz). HRMS (ESI) calcd for  $\text{C}_{20}\text{H}_{30}\text{F}_2\text{N}_2^{79}\text{BrNa}$ :  $[\text{M} + \text{Na}]^+$  :  $m/z$  359.22747. Found:  $m/z$  359.2274 (0 ppm).

### 3.2. Synthesis 3-[5-(1,1-difluorodecyl)-1-methyl-4,5-dihydro-1H-pyrazole-3-yl]-pyridine ((±)-4b)

The reaction was performed with **3b** (100 mg, 0.29 mmol) according to the general procedure. After 2.5 h,  $^{19}\text{F}$  NMR monitoring showed the absence of starting material. After purification by flash chromatography on silica gel, the pyrazoline **4b** was isolated as yellow crystals (88 mg, 79%). Mp: 51-53 °C.  $R_f = 0.44$  ( $\text{Et}_2\text{O}$ /pentane 5/5).  $^1\text{H}$  NMR ( $\text{CDCl}_3$ , 300 MHz),  $\delta$  ppm: 8.72 (s, 1H); 8.50 (d, 1H,  $J = 3.8$  Hz); 7.93 (dt, 1H,  $J = 8.0$  Hz,  $J = 1.6$  Hz); 7.23 (dd, 1H,  $J = 8.0$  Hz,  $J = 3.8$  Hz); 3.51 (dddd, 1H,  $J = 11.9$  Hz,  $J = 11.7$  Hz,  $^3J_{HF} = 11.7$  Hz,  $^3J_{HF} = 6.6$  Hz); 3.26 (dd, 1H,  $J = 16.9$  Hz,  $J = 11.7$  Hz); 2.94 (dd, 1H,  $J = 16.9$  Hz,  $J = 11.9$  Hz); 2.93 (s, 3H); 2.03-1.66 (m, 2H); 1.56-1.41 (m, 2H); 1.34-1.09 (m, 12H); 0.80 (t, 3H,  $J = 6.7$  Hz).  $^{13}\text{C}$  NMR ( $\text{CDCl}_3$ , 75 MHz),  $\delta$  ppm: 149.6; 147.1; 146.1; 132.8; 128.2; 124.36 (t,  $\text{C}_{10}$ ,  $^1J_{CF} = 242.8$  Hz); 123.4; 71.1 (dd,  $^2J_{CF} = 27.9$  Hz,  $^2J_{CF} = 27.2$  Hz); 43.67 (t,  $J = 1.5$  Hz); 35.2 (dd,  $^3J_{CF} = 5.1$  Hz,  $^3J_{CF} = 2.6$  Hz); 32.90 (t,  $^2J_{CF} = 24.3$  Hz); 31.2; 29.39 (2C); 29.36; 29.2; 22.6; 21.1 (t,  $^3J_{CF} = 4.0$  Hz); 14.1.  $^{19}\text{F}$  NMR ( $\text{CDCl}_3$ , 282 MHz),  $\delta$  ppm: -102.55 (ddt,  $J_{FF} = 250.7$  Hz,  $J_{FH} = 26.5$  Hz, 11.7 Hz); -104.54 (dddd,  $J_{FF} = 250.7$  Hz,  $J_{FH} = 26.3$  Hz, 10.4 Hz, 6.6 Hz). HRMS (ESI) calcd for  $\text{C}_{19}\text{H}_{29}\text{F}_2\text{N}_3^{79}\text{BrNa}$ :  $[\text{M} + \text{H}]^+$  :  $m/z$  338.24078. Found:  $m/z$  338.2408 (0 ppm).

### 3.3. Synthesis of 5-(1,1-difluorodecyl)-3-furan-2-yl-1-methyl-4,5-dihydro-1H-pyrazole ((±)-4c)

The reaction was performed with **3c** (58 mg, 0.17 mmol) according to the general procedure. After 2 h 35 min,  $^{19}\text{F}$  NMR monitoring showed the absence of starting material. After purification by flash chromatography on silica gel, the pyrazoline **4c** was isolated as white

crystals (54 mg, 81%). Mp: 68-70 °C.  $R_f$  = 0.31 (Et<sub>2</sub>O/pentane 1/9). <sup>1</sup>H NMR (CDCl<sub>3</sub>, 300 MHz),  $\delta$  ppm: 7.44 (dd, 1H,  $J$  = 1.8 Hz, 0.7 Hz); 6.52 (dd, 1H,  $J$  = 3.4 Hz,  $J$  = 0.7 Hz); 6.43 (dd, 1H,  $J$  = 3.4 Hz,  $J$  = 1.8 Hz); 3.50 (dddd, 1H,  $J$  = 11.9 Hz,  $^3J_{HF}$  = 11.9 Hz,  $J$  = 11.8 Hz,  $^3J_{HF}$  = 6.2 Hz); 3.24 (dd, 1H,  $J$  = 16.9 Hz,  $J$  = 11.9 Hz); 3.00 (dd, 1H,  $J$  = 16.9 Hz,  $J$  = 12.1 Hz); 2.87 (s, 3H); 2.02-1.77 (m, 2H); 1.61-1.49 (m, 2H); 1.39-1.19 (m, 12H); 0.85 (t, 3H,  $J$  = 6.7 Hz). <sup>13</sup>C NMR (CDCl<sub>3</sub>, 125 MHz),  $\delta$  ppm: 147.5; 143.5; 141.3; 124.5 (t,  $^1J_{CF}$  = 242.8 Hz); 111.5; 109.8; 123.4; 71.9 (dd,  $^2J_{CF}$  = 28.5 Hz,  $^2J_{CF}$  = 27.5 Hz); 43.9; 35.7 (dd,  $^3J_{CF}$  = 5.4 Hz,  $^3J_{CF}$  = 2.1 Hz); 32.9 (t,  $^2J_{CF}$  = 24.3 Hz); 31.9; 29.43 (2C); 29.39; 29.2; 22.7; 21.1 (t,  $^3J_{CF}$  = 4.0 Hz); 14.1. <sup>19</sup>F NMR (CDCl<sub>3</sub>, 282 MHz),  $\delta$  ppm: -102.05 (ddt,  $J_{FF}$  = 251.6 Hz,  $J_{FH}$  = 27.3 Hz, 11.9 Hz); -104.17 (dddd,  $J_{FF}$  = 251.6 Hz,  $J_{FH}$  = 25.8 Hz, 11.6 Hz, 6.2 Hz). HRMS (ESI) calcd for C<sub>18</sub>H<sub>28</sub>F<sub>2</sub>N<sub>2</sub>O<sup>79</sup>BrNa: [M + Na]<sup>+</sup> :  $m/z$  349.20674. Found:  $m/z$  349.2067 (0 ppm).

### 3.4. Synthesis of 5-(1,1-difluorodecyl)-1-methyl-3-(thiophen-2-yl)-4,5-dihydro-1H-pyrazole ((±)-4d)

The reaction was performed with **3d** (155 mg, 0.45 mmol) according to the general procedure. After 4 h 35 min, <sup>19</sup>F NMR monitoring showed the absence of starting material. After purification by flash chromatography on silica gel, the pyrazoline **4d** was isolated as white crystals (137 mg, 82%). Mp: 67-69 °C.  $R_f$  = 0.29 (Et<sub>2</sub>O/pentane 5/95). <sup>1</sup>H NMR (CDCl<sub>3</sub>, 300 MHz),  $\delta$  ppm: 7.28 (dd, 1H,  $J$  = 5.0 Hz, 1.2 Hz); 7.06 (dd, 1H,  $J$  = 3.6 Hz,  $J$  = 1.2 Hz); 7.00 (dd, 1H,  $J$  = 5.0 Hz,  $J$  = 3.6 Hz); 3.52 (dddd, 1H,  $J$  = 11.9 Hz,  $J$  = 11.5 Hz,  $^3J_{HF}$  = 11.5 Hz,  $^3J_{HF}$  = 6.7 Hz); 3.31 (dd, 1H,  $J$  = 16.7 Hz,  $J$  = 11.5 Hz); 3.05 (dd, 1H,  $J$  = 16.7 Hz,  $J$  = 11.9 Hz); 2.89 (s, 3H); 2.09-1.76 (m, 2H); 1.65-1.49 (m, 2H); 1.43-1.23 (m, 12H); 0.88 (t, 3H,  $J$  = 6.7 Hz). <sup>13</sup>C NMR (CDCl<sub>3</sub>, 75 MHz),  $\delta$  ppm: 145.1; 135.8; 127.2; 126.8; 126.3; 124.5 (t,  $^1J_{CF}$  = 242.6 Hz); 71.6 (dd,  $^2J_{CF}$  = 28.5 Hz,  $^2J_{CF}$  = 27.6 Hz); 43.8 (t,  $^3J$  = 1.4 Hz); 36.5 (dd,  $^3J_{CF}$  = 5.4 Hz,  $^3J_{CF}$  = 2.4 Hz); 32.8 (t,  $^2J_{CF}$  = 24.2 Hz); 31.2; 29.37 (2C); 29.34; 29.2; 22.6; 21.0 (t,  $^3J_{CF}$  = 4.0 Hz); 14.0. <sup>19</sup>F NMR (CDCl<sub>3</sub>, 282 MHz),  $\delta$  ppm: -101.92 (ddt,  $J_{FF}$  = 250.9 Hz,  $J_{FH}$  = 27.9 Hz, 11.5 Hz); -104.21 (dddd,  $J_{FF}$  = 250.9 Hz,  $J_{FH}$  = 27.5 Hz, 11.2 Hz, 6.7 Hz). HRMS (ESI) calcd for C<sub>18</sub>H<sub>28</sub>F<sub>2</sub>N<sub>2</sub>S<sup>79</sup>BrNa: [M + Na]<sup>+</sup> :  $m/z$  365.18390. Found:  $m/z$  365.1849 (3 ppm).

### 3.5. Synthesis of 3-(4-bromophenyl)-5-(1,1-difluorodecyl)-1-methyl-4,5-dihydro-1H-pyrazole ((±)-**4e**)

The reaction was performed with **3e** (75 mg, 0.18 mmol) according to the general procedure. After 2.5 h,  $^{19}\text{F}$  NMR monitoring showed the absence of starting material. After purification by flash chromatography on silica gel, the pyrazoline **4e** was isolated as a sticky syrup (74 mg, 86%).  $R_f = 0.43$  ( $\text{Et}_2\text{O}$ /pentane 5/95).  $^1\text{H}$  NMR ( $\text{CDCl}_3$ , 300 MHz),  $\delta$  ppm: 7.47 (s, 4H); 3.55 (dddd, 1H,  $J = 12.0$  Hz,  $J = 11.8$  Hz,  $^3J_{\text{HF}} = 11.8$  Hz,  $^3J_{\text{HF}} = 6.6$  Hz); 3.29 (dd, 1H,  $J = 16.9$  Hz,  $J = 11.8$  Hz); 3.00 (dd, 1H,  $J = 16.9$  Hz,  $J = 12.0$  Hz); 2.99 (s, 3H); 2.08-1.75 (m, 2H); 1.64-1.49 (m, 2H); 1.43-1.18 (m, 12H); 0.88 (t, 3H,  $J = 6.7$  Hz).  $^{13}\text{C}$  NMR ( $\text{CDCl}_3$ , 75 MHz),  $\delta$  ppm: 148.0; 131.7 (2C); 131.1; 127.7 (2C); 124.5 (t,  $^1J_{\text{CF}} = 242.6$  Hz); 123.0; 71.3 (dd,  $^2J_{\text{CF}} = 28.5$  Hz,  $^2J_{\text{CF}} = 27.5$  Hz); 43.8 (t, 1.4 Hz); 35.6 (dd,  $^3J_{\text{CF}} = 5.1$  Hz,  $^3J_{\text{CF}} = 2.5$  Hz); 33.1 (t,  $^2J_{\text{CF}} = 24.3$  Hz); 31.9; 29.5 (2C); 29.4; 29.3; 22.7; 21.1 (t,  $^3J_{\text{CF}} = 3.9$  Hz); 14.1.  $^{19}\text{F}$  NMR ( $\text{CDCl}_3$ , 282 MHz),  $\delta$  ppm: -102.23 (ddt,  $J_{\text{FF}} = 250.8$  Hz,  $J_{\text{FH}} = 26.9$  Hz, 11.8 Hz); -104.38 (dddd,  $J_{\text{FF}} = 250.8$  Hz,  $J_{\text{FH}} = 27.3$  Hz, 11.5 Hz, 6.6 Hz). HRMS (ESI) calcd for  $\text{C}_{20}\text{H}_{29}\text{F}_2\text{N}_2\text{Br}^{79}\text{BrNa}$ :  $[\text{M} + \text{Na}]^+$  :  $m/z$  437.13799. Found:  $m/z$  437.1382 (0 ppm).

## 4. General procedure for the synthesis of pyrrolines (6)

To a solution of *gem*-difluoroenone **3** (1 equiv) and Schiff base **5** (1 equiv) in CH<sub>2</sub>Cl<sub>2</sub> (1.5 ml per mmol) cooled to 5 °C was added DBU (0.5 equiv). After stirring at 25 °C for the appropriate time (monitored by <sup>19</sup>F NMR), HCl (12 N, 1.5 equiv) was added and the mixture was stirred at 25 °C for the time *t* (monitored by <sup>19</sup>F NMR). Then water was added and the mixture was extracted with CH<sub>2</sub>Cl<sub>2</sub>. The organic layers were combined, dried over MgSO<sub>4</sub>, filtered and concentrated in vacuo. The crude residue was then purified by flash chromatography over silica gel.

### 4.1. Synthesis of 3-(1,1-difluorodecyl)-5-phenyl-3,4-dihydro-2*H*-pyrrole-2-carboxylic acid ethyl ester ((±)-**6a**)

The reaction was performed from **3a** (400 mg, 1.29 mmol) according to the general procedure. After purification by chromatography on silica gel, pyrroline **6a** was obtained as beige crystals (378 mg, 74% yield). Mp: 66-68 °C. *R*<sub>f</sub> = 0.31 (Et<sub>2</sub>O/pentane 2/8). <sup>1</sup>H NMR (C<sub>6</sub>D<sub>6</sub>, 300 MHz), δ ppm: 7.85-7.75 (dd, 2H, *J* = 7.7 Hz, *J* = 1.4 Hz); 7.11-7.03 (m, 3H); 5.23 (dt, 1H, *J* = 6.5 Hz, <sup>4</sup>*J*<sub>HF</sub> = 1.7 Hz); 4.41-3.94 (m, 2H); 3.51-3.29 (m, 1H); 2.92 (ddd, 1H, *J* = 17.4 Hz, *J* = 7.2 Hz, <sup>4</sup>*J*<sub>HF</sub> = 1.7 Hz); 2.82 (ddd, 1H, *J* = 17.4 Hz, *J* = 10.0 Hz, <sup>4</sup>*J*<sub>HF</sub> = 2.3 Hz); 1.73-1.62 (m, 2H); 1.56-1.43 (m, 2H); 1.33-1.12 (m, 12H); 0.96 (t, 3H, *J* = 7.1 Hz), 0.91 (t, 3H, *J* = 6.6 Hz). <sup>13</sup>C NMR (CDCl<sub>3</sub>, 75 MHz), δ ppm: 174.1; 171.8; 133.2; 131.2; 128.4 (2C); 128.0 (2C); 124.4 (t, <sup>1</sup>*J*<sub>CF</sub> = 243.1 Hz); 75.5 (dd, <sup>3</sup>*J*<sub>CF</sub> = 4.0 Hz, <sup>3</sup>*J*<sub>CF</sub> = 2.7 Hz); 61.6; 46.1 (t, <sup>2</sup>*J*<sub>CF</sub> = 25.1 Hz); 36.7 (dd, <sup>3</sup>*J*<sub>CF</sub> = 5.0 Hz, <sup>3</sup>*J*<sub>CF</sub> = 2.7 Hz); 35.3 (t, <sup>2</sup>*J*<sub>CF</sub> = 25.1 Hz); 31.8; 29.4; 29.32; 29.27; 29.2; 22.6; 21.8 (t, <sup>3</sup>*J*<sub>CF</sub> = 4.3 Hz); 14.11; 14.05. <sup>19</sup>F NMR (C<sub>6</sub>D<sub>6</sub>, 282 MHz), δ ppm: -103.05 (dq, 1F, *J*<sub>FF</sub> = 244.1 Hz, *J*<sub>FH</sub> = 16.5 Hz); -104.8 (dq, 1F, *J*<sub>FF</sub> = 244.1 Hz, *J*<sub>FH</sub> = 16.2 Hz). HRMS (ESI) calcd for C<sub>23</sub>H<sub>33</sub>F<sub>2</sub>NO<sub>2</sub><sup>79</sup>BrNa: [M + Na]<sup>+</sup> : *m/z* 416.23771. Found: *m/z* 416.2370 (2 ppm).

### 4.2. Synthesis of 3-(1,1-Difluorodecyl)-5-(pyridin-3-yl)-3,4-dihydro-2*H*-pyrrole-2-carboxylic acid ethyl ester ((±)-**6b**)

The reaction was performed from **3b** (205 mg, 0.66 mmol) according to the general procedure. After purification by chromatography on silica gel, pyrroline **6b** was obtained as

white crystals (191 mg, 73% yield). Mp: 43-45 °C.  $R_f$  = 0.32 (Et<sub>2</sub>O/pentane 7/3). <sup>1</sup>H NMR (C<sub>6</sub>D<sub>6</sub>, 300 MHz),  $\delta$  ppm: 8.91 (d, 1H,  $J$  = 1.2 Hz); 8.46 (dd, 1H,  $J$  = 4.6 Hz,  $J$  = 1.2 Hz); 7.94 (dt, 1H,  $J$  = 8.0 Hz,  $J$  = 1.8 Hz); 6.61 (ddd, 1H,  $J$  = 8.0 Hz,  $J$  = 4.6 Hz,  $J$  = 0.6 Hz); 5.19 (dt, 1H,  $J$  = 6.5 Hz,  $^4J_{HF}$  = 1.7 Hz); 4.10-3.94 (m, 2H); 3.45-3.21 (m, 1H); 2.74 (ddd, 1H,  $J$  = 17.5 Hz,  $J$  = 7.2 Hz,  $^4J_{HF}$  = 1.7 Hz); 2.63 (ddd, 1H,  $J$  = 17.5 Hz,  $J$  = 10.0 Hz,  $^4J_{HF}$  = 2.4 Hz); 1.75-1.59 (m, 2H); 1.54-1.45 (m, 2H); 1.28-1.13 (m, 12H); 0.96 (t, 3H,  $J$  = 7.1 Hz), 0.92 (t, 3H,  $J$  = 7.0 Hz). <sup>13</sup>C NMR (CDCl<sub>3</sub>, 75 MHz),  $\delta$  ppm: 171.9; 171.5; 152.0; 149.3; 135.1; 129.0; 127.5; 124.3 (t,  $^1J_{CF}$  = 243.3 Hz); 123.5; 75.6 (dd,  $^3J_{CF}$  = 4.2 Hz,  $^3J_{CF}$  = 2.8 Hz); 61.8; 46.1 (t,  $^2J_{CF}$  = 25.3 Hz); 36.6 (dd,  $^3J_{CF}$  = 5.2 Hz,  $^3J_{CF}$  = 2.7 Hz); 35.7 (t,  $^2J_{CF}$  = 24.8 Hz); 31.8; 29.4; 29.34; 29.30; 29.2; 22.6; 21.8 (t,  $^3J_{CF}$  = 3.9 Hz); 14.1; 14.0. <sup>19</sup>F NMR (CDCl<sub>3</sub>, 282 MHz),  $\delta$  ppm: -103.55 (dq, 1F,  $J_{FF}$  = 244.4 Hz,  $J_{FH}$  = 17.8 Hz); -105.86 (dq, 1F,  $J_{FF}$  = 244.5 Hz,  $J_{FH}$  = 15.5 Hz). HRMS (ESI) calcd for C<sub>22</sub>H<sub>32</sub>F<sub>2</sub>N<sub>2</sub>O<sub>2</sub><sup>79</sup>BrNa: [M + Na]<sup>+</sup> :  $m/z$  417.23295. Found:  $m/z$  417.2328 (0 ppm).

#### 4.3. Synthesis of 3-(1,1-difluorodecyl)-5-(furan-2-yl)-3,4-dihydro-2H-pyrrole-2-carboxylic acid ethyl ester ((±)-6c)

The reaction was performed from **3c** (236 mg, 0.79 mmol) according to the general procedure. After purification by chromatography on silica gel, pyrroline **6c** was obtained as beige crystals (227 mg, 75% yield). Mp: 64-66 °C.  $R_f$  = 0.28 (Et<sub>2</sub>O/pentane 3/7). <sup>1</sup>H NMR (C<sub>6</sub>D<sub>6</sub>, 300 MHz),  $\delta$  ppm: 6.96 (d, 1H,  $J$  = 1.5 Hz); 6.74 (d, 1H,  $J$  = 3.5 Hz); 5.94 (dd, 1H,  $J$  = 3.5 Hz,  $J$  = 1.5 Hz); 5.21 (dt, 1H,  $J$  = 6.3 Hz,  $^4J_{HF}$  = 1.9 Hz); 4.07-3.91 (m, 2H); 3.43-3.21 (m, 1H); 2.95 (ddd, 1H,  $J$  = 17.7 Hz,  $J$  = 7.4 Hz,  $^4J_{HF}$  = 1.8 Hz); 2.86 (ddd, 1H,  $J$  = 17.7 Hz,  $J$  = 9.9 Hz,  $^4J_{HF}$  = 2.1 Hz); 1.74-1.56 (m, 2H); 1.52-1.38 (m, 2H); 1.34-1.08 (m, 12H); 0.94 (t, 3H,  $J$  = 7.2 Hz), 0.91 (t, 3H,  $J$  = 6.9 Hz). <sup>13</sup>C NMR (C<sub>6</sub>D<sub>6</sub>, 75 MHz),  $\delta$  ppm: 171.7; 164.4; 150.0; 144.5; 124.8 (t,  $^1J_{CF}$  = 243.0 Hz); 113.3; 111.8; 76.3 (dd,  $^3J_{CF}$  = 3.7 Hz,  $^3J_{CF}$  = 2.9 Hz); 61.3; 46.2 (t,  $^2J_{CF}$  = 25.3 Hz); 36.9 (dd,  $^3J_{CF}$  = 4.9 Hz,  $^3J_{CF}$  = 3.0 Hz); 35.9 (t,  $^2J_{CF}$  = 25.1 Hz); 32.1; 29.7; 29.6; 29.5; 29.4; 22.9; 22.1 (t,  $^3J_{CF}$  = 4.2 Hz); 14.2; 13.9. <sup>19</sup>F NMR (C<sub>6</sub>D<sub>6</sub>, 282 MHz),  $\delta$  ppm: -103.43 (dq, 1F,  $J_{FF}$  = 244.3 Hz,  $J_{FH}$  = 16.4 Hz); -104.57 (dq, 1F,  $J_{FF}$  = 244.3 Hz,  $J_{FH}$  = 15.9 Hz). HRMS (ESI) calcd for C<sub>21</sub>H<sub>31</sub>F<sub>2</sub>NO<sub>3</sub><sup>79</sup>BrNa: [M + Na]<sup>+</sup> :  $m/z$  406.21697. Found:  $m/z$  406.2168 (0 ppm).

#### 4.4. Synthesis of 3-(1,1-difluorodecyl)-5-(thiophen-2-yl)-3,4-dihydro-2H-pyrrole-2-carboxylic acid ethyl ester ((±)-6d)

The reaction was performed from **3d** (250 mg, 0.79 mmol) according to the general procedure. After purification by chromatography on silica gel, pyrroline **6d** was obtained as white crystals (235 mg, 74% yield). Mp: 67-69 °C.  $R_f$  = 0.24 (Et<sub>2</sub>O/pentane 2/8). <sup>1</sup>H NMR (C<sub>6</sub>D<sub>6</sub>, 400 MHz),  $\delta$  ppm: 6.87 (dd, 1H,  $J$  = 3.6 Hz,  $J$  = 0.8 Hz); 6.81 (dd, 1H,  $J$  = 4.9 Hz,  $J$  = 0.8 Hz); 6.59 (dd, 1H,  $J$  = 4.9 Hz,  $J$  = 3.6 Hz); 5.14 (dt, 1H,  $J$  = 6.4 Hz,  $^4J_{HF}$  = 1.4 Hz); 4.08-3.92 (m, 2H); 3.49-3.29 (m, 1H); 2.91 (ddd, 1H,  $J$  = 17.2 Hz,  $J$  = 7.1 Hz,  $^4J_{HF}$  = 1.5 Hz); 2.80 (ddd, 1H,  $J$  = 17.2 Hz,  $J$  = 10.1 Hz,  $^4J_{HF}$  = 2.2 Hz); 1.73-1.61 (m, 2H); 1.55-1.42 (m, 2H); 1.32-1.09 (m, 12H); 0.93 (t, 3H,  $J$  = 7.2 Hz), 0.88 (t, 3H,  $J$  = 6.8 Hz). <sup>13</sup>C NMR (C<sub>6</sub>D<sub>6</sub>, 75 MHz),  $\delta$  ppm: 171.8; 168.2; 150.0; 138.7; 130.4; 130.3; 127.3; 124.9 (t,  $^1J_{CF}$  = 243.0 Hz); 76.0 (dd,  $^3J_{CF}$  = 4.2 Hz,  $^3J_{CF}$  = 1.2 Hz); 61.5; 47.0 (t,  $^2J_{CF}$  = 25.3 Hz); 37.4 (dd,  $^3J_{CF}$  = 4.9 Hz,  $^3J_{CF}$  = 1.9 Hz); 36.0 (t,  $^2J_{CF}$  = 25.1 Hz); 32.2; 29.8; 29.71; 29.66; 29.59; 23.1; 22.2 (t,  $^3J_{CF}$  = 4.2 Hz); 14.3; 14.0. <sup>19</sup>F NMR (C<sub>6</sub>D<sub>6</sub>, 282 MHz),  $\delta$  ppm: -102.73 (dq, 1F,  $J_{FF}$  = 244.3 Hz,  $J_{FH}$  = 16.8 Hz); -104.8 (dq, 1F,  $J_{FF}$  = 244.3 Hz,  $J_{FH}$  = 16.1 Hz). HRMS (ESI) calcd for C<sub>21</sub>H<sub>31</sub>F<sub>2</sub>NO<sub>2</sub>S<sup>79</sup>BrNa: [M + Na]<sup>+</sup> : m/z 422.19413. Found: m/z 422.1927 (3 ppm).

#### 4.5. Synthesis of 5-(4-bromophenyl)-3-(1,1-difluorodecyl)-3,4-dihydro-2H-pyrrole-2-carboxylic acid ethyl ester ((±)-6e)

The reaction was performed from **3e** (380 mg, 0.98 mmol) according to the general procedure. After purification by chromatography on silica gel, pyrroline **6e** was obtained as white crystals (363 mg, 78% yield). Mp: 45-47 °C.  $R_f$  = 0.29 (Et<sub>2</sub>O/pentane 1/9). <sup>1</sup>H NMR (C<sub>6</sub>D<sub>6</sub>, 400 MHz),  $\delta$  ppm: 7.40 (d, 1H,  $J$  = 8.6 Hz,  $J$  = 1.9 Hz); 7.17 (dd, 1H,  $J$  = 8.6 Hz,  $J$  = 1.6 Hz); 5.16 (dt, 1H,  $J$  = 6.5 Hz,  $^4J_{HF}$  = 1.7 Hz); 4.09-3.95 (m, 2H); 3.48-3.21 (m, 1H); 2.78 (ddd, 1H,  $J$  = 17.4 Hz,  $J$  = 7.3 Hz,  $^4J_{HF}$  = 1.5 Hz); 2.65 (ddd, 1H,  $J$  = 17.4 Hz,  $J$  = 10.1 Hz,  $^4J_{HF}$  = 2.3 Hz); 1.76-1.64 (m, 2H); 1.57-1.45 (m, 2H); 1.34-1.14 (m, 12H); 0.91 (t, 3H,  $J$  = 7.1 Hz), 0.86 (t, 3H,  $J$  = 6.5 Hz). <sup>13</sup>C NMR (CDCl<sub>3</sub>, 75 MHz),  $\delta$  ppm: 173.2; 171.7; 132.1; 131.8 (2C); 129.6 (2C); 125.9; 124.4 (t,  $^1J_{CF}$  = 243.2 Hz); 75.6 (dd,  $^3J_{CF}$  = 4.1 Hz,  $^3J_{CF}$  = 2.6 Hz); 61.8; 46.2 (t,  $^2J_{CF}$  = 25.2 Hz); 36.7 (dd,  $^3J_{CF}$  = 5.1 Hz,  $^3J_{CF}$  = 2.6 Hz); 35.7 (t,  $^2J_{CF}$  = 24.9 Hz); 31.9; 29.4; 29.39; 29.34; 29.28; 22.7; 21.9 (t,  $^3J_{CF}$  = 4.1 Hz); 14.2; 14.1. <sup>19</sup>F NMR (CDCl<sub>3</sub>, 282 MHz),  $\delta$  ppm: -103.48 (dq, 1F,  $J_{FF}$  = 244.5 Hz,  $J_{FH}$  = 13.6 Hz); -105.73 (dq, 1F,  $J_{FF}$  = 244.5 Hz,  $J_{FH}$  = 15.6 Hz). HRMS (ESI) calcd for C<sub>23</sub>H<sub>32</sub>F<sub>2</sub>NO<sub>2</sub>Br<sup>79</sup>BrNa: [M + Na]<sup>+</sup> : m/z 494.14822. Found: m/z 494.1483 (0 ppm).

## 5. General procedure for the Suzuki–Miyaura reaction

A solution of brominated derivatives **4e** or **6e** (1 equiv), phenylboronic acid (2 equiv), palladium dichlorobistriphenylphosphine (5 mol %) and potassium carbonate (2 equiv) in a 5/1 mixture of dioxane and water (1 ml per 0.1 mmol) was stirred at 90 °C for 24 h. After addition of MgSO<sub>4</sub> and filtration, the residues were washed with ether and the solution concentrated in vacuo. The crude residue was then purified by flash chromatography on silica gel.

### 5.1. Synthesis of 3-biphenyl-4-yl-5(1,1-difluorodecyl)-1-methyl-4,5-dihydro-1H-pyrazole ((±)-**7e**)

The reaction was performed from **4e** (78 mg, 0.19 mmol) according to the general procedure. After purification by chromatography on silica gel, the product **7e** was isolated as a sticky syrup (64 mg, 82% yield).  $R_f$  = 0.31 (Et<sub>2</sub>O/pentane 5/95). <sup>1</sup>H NMR (CDCl<sub>3</sub>, 300 MHz),  $\delta$  ppm: 7.72-7.67(m, 2H); 7.64-7.57(m, 4H); 7.49-7.34 (m, 3H); 3.54 (dddd, 1H,  $J$  = 12.0 Hz,  $J$  = 11.7 Hz,  $^3J_{HF}$  = 11.7 Hz,  $^3J_{HF}$  = 6.6 Hz); 3.29 (dd, 1H,  $J$  = 16.9 Hz,  $J$  = 11.7 Hz); 3.02 (dd, 1H,  $J$  = 16.9 Hz,  $J$  = 12.0 Hz); 3.00 (s, 3H); 2.09-1.74 (m, 2H); 1.63-1.51 (m, 2H); 1.43-1.18 (m, 12H); 0.87 (t, 3H,  $J$  = 6.7 Hz). <sup>13</sup>C NMR (CDCl<sub>3</sub>, 75 MHz),  $\delta$  ppm: 149.3; 141.7; 140.3; 130.8; 128.82 (2C); 127.6; 127.2 (2C); 127.0 (2C); 126.4 (2C); 124.5 (t,  $^1J_{CF}$  = 242.8 Hz); 71.1 (dd,  $^2J_{CF}$  = 28.4 Hz,  $^2J_{CF}$  = 27.4 Hz); 44.0; 35.8 (dd,  $^3J_{CF}$  = 5.1 Hz,  $^3J_{CF}$  = 2.1 Hz); 33.0 (t,  $^2J_{CF}$  = 24.4 Hz); 31.8; 29.43 (2C); 29.40; 29.3; 22.7; 21.1 (t,  $^3J_{CF}$  = 4.1 Hz); 14.1. <sup>19</sup>F NMR (CDCl<sub>3</sub>, 282 MHz),  $\delta$  ppm: -102.13 (ddt,  $J_{FF}$  = 250.5 Hz,  $J_{FH}$  = 26.8 Hz, 11.7 Hz); -104.33 (dddd,  $J_{FF}$  = 250.5 Hz,  $J_{FH}$  = 27.2 Hz, 11.5 Hz, 6.6 Hz). HRMS (ESI) calcd for C<sub>26</sub>H<sub>34</sub>F<sub>2</sub>N<sub>2</sub><sup>79</sup>BrNa: [M + Na]<sup>+</sup> : 435.25878. m/z Found: 435.2584 (1 ppm).

### 5.2. Synthesis of 5-biphenyl-4-yl-3-(1,1-difluorodecyl)-3,4-dihydro-2H-pyrrole-2-carboxylic acid ethyl ester (±)-**10e**

The reaction was performed from **6e** (67 mg, 0.14 mmol) according to the general procedure. After purification by chromatography on silica gel, the product **10e** was isolated as a sticky syrup (52 mg, 78% yield).  $R_f$  = 0.35 (Et<sub>2</sub>O/pentane 2/8). <sup>1</sup>H NMR (C<sub>6</sub>D<sub>6</sub>, 300 MHz),  $\delta$  ppm: 7.88-7.79 (m, 2H); 7.43-7.34 (m, 4H); 7.24-7.16 (m, 3H); 5.28 (dt, 1H,  $J$  = 6.4 Hz,  $^4J_{HF}$  = 1.5 Hz); 4.06-3.92 (m, 2H); 3.55-3.32 (m, 1H); 3.01 (ddd, 1H,  $J$  = 17.4 Hz,  $J$  = 7.3 Hz,  $^4J_{HF}$  = 1.6



Hz); 2.88 (ddd, 1H,  $J = 17.4$  Hz,  $J = 10.1$  Hz,  $^4J_{HF} = 2.3$  Hz); 1.84-1.63 (m, 2H); 1.61-1.48 (m, 2H); 1.36-1.12 (m, 12H); 0.99 (t, 3H,  $J = 7.1$  Hz), 0.92 (t, 3H,  $J = 7.0$  Hz).  $^{13}\text{C}$  NMR ( $\text{C}_6\text{D}_6$ , 75 MHz),  $\delta$  ppm: 173.3; 172.1; 144.0; 140.7; 132.9; 129.2 (2C); 129.1 (2C); 127.3 (2C); 127.2 (2C); 125.1 (t,  $^1J_{CF} = 242.9$  Hz); 76.4 (dd,  $^3J_{CF} = 3.7$  Hz,  $^3J_{CF} = 2.7$  Hz); 61.5; 46.8 (t,  $^2J_{CF} = 24.8$  Hz); 36.9 (dd,  $^3J = 4.6$  Hz,  $^3J_{CF} = 2.7$  Hz); 35.1 (t,  $^2J_{CF} = 25.1$  Hz); 32.2; 29.84; 29.75; 29.68; 29.65; 23.1; 22.3 (t,  $^3J_{CF} = 4.3$  Hz); 14.3; 14.1.  $^{19}\text{F}$  NMR ( $\text{C}_6\text{D}_6$ , 282 MHz),  $\delta$  ppm: -102.9 (dq, 1F,  $J_{FF} = 243.8$  Hz,  $J_{FH} = 16.7$  Hz); -104.8 (dq, 1F,  $J_{FF} = 243.8$  Hz,  $J_{FH} = 16.2$  Hz). HRMS (ESI) calcd for  $\text{C}_{29}\text{H}_{37}\text{F}_2\text{NO}_2$   $^{79}\text{BrNa}$ :  $[\text{M} + \text{Na}]^+ : m/z$  492.26901. Found:  $m/z$  492.2682 (2 ppm).

## 6. General procedure for the Heck reaction

$\text{Et}_3\text{N}$  (1 ml per 0.1 mmol) was first degassed by bubbling argon for 10 min. Then were added successively: bromo-compound **4e** or **6e** (1 equiv), palladium acetate (10 mol %), tri-*o*-tolylphosphine (0.2 equiv) and methyl acrylate (3.2 equiv). The reaction mixture was stirred under argon at 100 °C for 12 h. After addition of ether, the reaction mixture was washed with water and the aqueous phase was extracted with ether. The combined organic phases were dried ( $\text{MgSO}_4$ ), filtered and concentrated in vacuo. The crude residue was then purified by flash chromatography on silica gel.

### 6.1. Synthesis of 3-{4-[5-(1,1-difluorodecyl)-1-methyl-4,5-dihydro-1*H*-pyrazol-3-yl]-phenyl}-acrylic acid methyl ester ((±)-**8e**)

The reaction was performed from **4e** (111 mg, 0.27 mmol) according to the general procedure. After purification by chromatography on silica gel, the product **8e** was isolated as a sticky syrup (81 mg, 72% yield).  $R_f = 0.30$  ( $\text{Et}_2\text{O}$ /pentane 1/9).  $^1\text{H}$  NMR ( $\text{CDCl}_3$ , 300 MHz),  $\delta$  ppm: 7.67 (d, 1H,  $J = 16.1$  Hz); 7.61 (d, 2H,  $J = 8.4$  Hz); 7.50 (d, 2H,  $J = 8.4$  Hz); 6.45 (d, 1H,  $J = 16.1$  Hz); 3.80 (s, 3H); 3.58 (dddd, 1H,  $J = 12.0$  Hz,  $^3J_{HF} = 11.9$  Hz,  $J = 11.7$  Hz,  $^3J_{HF} = 6.5$  Hz); 3.33 (dd, 1H,  $J = 16.8$  Hz,  $J = 11.7$  Hz); 3.02 (dd, 1H,  $J = 16.8$  Hz,  $J = 12.0$  Hz); 3.01 (s, 3H); 2.08-1.76 (m, 2H); 1.63-1.50 (m, 2H); 1.39-1.17 (m, 12H); 0.88 (t, 3H,  $J = 6.7$  Hz).  $^{13}\text{C}$  NMR ( $\text{CDCl}_3$ , 75 MHz),  $\delta$  ppm: 167.3; 148.1; 144.0; 134.6; 133.9; 128.2 (2C); 126.2 (2C); 124.5 (t,  $^1J_{CF} = 242.6$  Hz); 118.0; 71.2 (t,  $^2J_{CF} = 28.8$  Hz); 51.7; 43.7; 35.5 (dd,  $^3J_{CF} = 5.0$  Hz,  $^3J_{CF} = 2.3$  Hz); 33.0 (t,  $^2J_{CF} = 24.3$  Hz); 31.8; 29.41 (2C); 29.37; 29.2; 22.6; 21.1 (t,  $^3J_{CF} = 4.0$  Hz); 14.1.  $^{19}\text{F}$  NMR ( $\text{CDCl}_3$ , 282 MHz),  $\delta$  ppm: -102.22 (ddt,  $J_{FF} = 250.5$  Hz,  $J_{FH} =$

27.0 Hz, 11.9 Hz); -104.34 (dddd,  $J_{FF} = 250.9$  Hz,  $J_{FH} = 26.7$  Hz, 12.2 Hz, 6.5 Hz). HRMS (ESI) calcd for  $C_{24}H_{34}F_2N_2O_2Na$ :  $[M + Na]^+$  :  $m/z$  443.24860. Found:  $m/z$  443.2787 (0 ppm).

## 6.2. Synthesis of 3-(1,1-difluorodecyl)-5-[4-(2-methoxycarbonyl-vinyl)-phenyl]-3,4-dihydro-2H-pyrrole-2-carboxylic acid ethyl ester ((±)-11e)

The reaction was performed from **6e** (124 mg, 0.26 mmol) according to the general procedure. After purification by chromatography on silica gel, the product **11e** was isolated as a sticky syrup (80 mg, 64% yield).  $R_f = 0.14$  (Et<sub>2</sub>O/pentane 2/8). <sup>1</sup>H NMR (C<sub>6</sub>D<sub>6</sub>, 300 MHz),  $\delta$  ppm: 7.70 (d, 1H,  $J = 16.1$  Hz); 7.62 (d, 2H,  $J = 8.3$  Hz); 7.00 (d, 2H,  $J = 8.3$  Hz); 6.37 (d, 1H,  $J = 16.1$  Hz); 5.23 (dt, 1H,  $J = 6.4$  Hz,  $^4J_{HF} = 1.8$  Hz); 4.12-3.94 (m, 2H); 3.48 (s, H); 3.47-3.29 (m, 1H); 2.83 (ddd, 1H,  $J = 17.4$  Hz,  $J = 7.3$  Hz,  $^4J_{HF} = 1.6$  Hz); 2.65 (ddd, 1H,  $J = 17.4$  Hz,  $J = 10.1$  Hz,  $^4J_{HF} = 2.3$  Hz); 1.80-1.62 (m, 2H); 1.60-1.45 (m, 2H); 1.31-1.13 (m, 12H); 0.98 (t, 3H,  $J = 7.1$  Hz), 0.92 (t, 3H,  $J = 6.5$  Hz). <sup>13</sup>C NMR (C<sub>6</sub>D<sub>6</sub>, 75 MHz),  $\delta$  ppm: 173.0; 171.9; 166.7; 143.8; 137.1; 135.1; 128.8 (2C); 128.2; 124.4 (t,  $^1J_{CF} = 242.7$  Hz); 119.6; 75.4 (dd,  $^3J_{CF} = 4.2$  Hz,  $^3J_{CF} = 2.7$  Hz); 61.6; 51.3; 46.7 (t,  $^2J_{CF} = 25.4$  Hz); 36.8 (dd,  $^3J_{CF} = 5.0$  Hz,  $^3J_{CF} = 2.7$  Hz); 36.1 (t,  $^2J_{CF} = 25.0$  Hz); 32.2; 29.8; 29.73; 29.67; 29.6; 23.1; 22.3 (t,  $^3J_{CF} = 4.0$  Hz); 14.3; 14.1. <sup>19</sup>F NMR (C<sub>6</sub>D<sub>6</sub>, 282 MHz),  $\delta$  ppm: -102.90 (dq, 1F,  $J_{FF} = 244.3$  Hz,  $J_{FH} = 16.2$  Hz); -105.0 (dq, 1F,  $J_{FF} = 244.3$  Hz,  $J_{FH} = 16.8$  Hz). HRMS (ESI) calcd for  $C_{27}H_{37}F_2NO_4Na$ :  $[M + Na]^+$  :  $m/z$  500.25883. Found:  $m/z$  500.2590 (0 ppm).

## 7. General procedure for the Sonogashira reaction

Dioxane (1 ml per 0.1 mmol) was first degassed by bubbling argon. Then were added successively: bromo-compound (**4e** or **6e**) (1 equiv), palladium dichlorobis(triphenylphosphine) (5 mol %), copper iodide (2.5 mol %), potassium carbonate (2 equiv) and ethynylbenzene (1 equiv). The reaction mixture was stirred under argon at 90 °C for 2 d. After addition of ether the reaction mixture was washed with water, the aqueous phase was extracted with ether. The combined organic phases were dried (MgSO<sub>4</sub>), filtered and concentrated in vacuo. The crude residue was then purified by flash chromatography on silica gel.

### 7.1. Synthesis of 5-(1,1-difluorodecyl)-1-methyl-3-(4-phenylethynyl-phenyl)-4,5-dihydro-1H-pyrazole ((±)-9e)

The reaction was performed from **4e** (100 mg, 0.26 mmol) according to the general procedure. After purification by chromatography on silica gel, the product **9e** was isolated as

a sticky syrup (78 mg, 74% yield).  $R_f = 0.29$  (Et<sub>2</sub>O/pentane 5/95). <sup>1</sup>H NMR (CDCl<sub>3</sub>, 300 MHz),  $\delta$  ppm: 7.67-7.53 (m, 6H); 7.42-7.36 (m, 3H); 3.61 (dddd, 1H,  $J = 12.0$  Hz,  $^3J_{HF} = 11.8$  Hz;  $J = 11.7$  Hz,  $^3J_{HF} = 6.4$  Hz); 3.29 (dd, 1H,  $J = 16.8$  Hz,  $J = 11.7$  Hz); 3.00 (dd, 1H,  $J = 16.8$  Hz,  $J = 12.0$  Hz); 3.04 (s, 3H); 2.15-1.81 (m, 2H); 1.63-1.58 (m, 2H); 1.41-1.24 (m, 12H); 0.91 (t, 3H,  $J = 6.5$  Hz). <sup>13</sup>C NMR (CDCl<sub>3</sub>, 75 MHz),  $\delta$  ppm: 148.4; 131.9; 131.7 (2C); 131.6 (2C); 128.4 (2C); 125.9 (2C); 125.3; 124.6 (t,  $^1J_{CF} = 242.7$  Hz); 123.6; 123.1; 90.9; 89.3; 71.3 (dd,  $^2J_{CF} = 28.6$  Hz,  $J_{CF} = 27.4$  Hz); 43.8; 35.5 (dd,  $^3J_{CF} = 5.1$  Hz,  $J_{CF} = 2.3$  Hz); 33.0 (t,  $^2J_{CF} = 24.5$  Hz); 31.9; 29.43 (2C); 29.40; 29.3; 22.7; 21.1 (t,  $^3J_{CF} = 4.1$  Hz); 14.1. <sup>19</sup>F NMR (CDCl<sub>3</sub>, 282 MHz),  $\delta$  ppm: -102.23 (ddt,  $J_{FF} = 250.8$  Hz,  $J_{FH} = 26.9$  Hz, 11.8 Hz); -104.38 (dddd,  $J_{FF} = 250.8$  Hz,  $J_{FH} = 27.3$  Hz, 11.5 Hz, 6.4 Hz). HRMS (ESI) calcd for C<sub>28</sub>H<sub>34</sub>F<sub>2</sub>N<sub>2</sub><sup>79</sup>BrNa: [M + Na]<sup>+</sup> : m/z 459.2583. Found: m/z 459.25877 (0 ppm).

## 7.2. Synthesis of 3-(1,1-difluorodecyl)-5-(4-phenylethynyl-phenyl)-3,4-dihydro-2H-pyrrole-2-carboxylic acid ethyl ester ((±)-12e)

The reaction was performed from **6e** (100 mg, 0.21 mmol) according to the general procedure. After purification by chromatography on silica gel, the product **12e** was isolated as a sticky syrup (73 mg, 70% yield).  $R_f = 0.21$  (Et<sub>2</sub>O/pentane 1/9). <sup>1</sup>H NMR (C<sub>6</sub>D<sub>6</sub>, 400 MHz),  $\delta$  ppm: 7.69-7.61 (m, 2H); 7.55-7.49 (m, 2H); 7.46-7.40 (2H); 7.1-6.8 (3H); 5.22 (dt, 1H,  $J = 6.5$  Hz,  $^4J_{HF} = 1.6$  Hz); 4.13-3.97 (m, 2H); 3.49-3.32 (m, 1H); 2.85 (ddd, 1H,  $J = 17.4$  Hz,  $J = 7.4$  Hz,  $^4J_{HF} = 1.6$  Hz); 2.71 (ddd, 1H,  $J = 17.4$  Hz,  $J = 10.2$  Hz,  $^4J_{HF} = 2.3$  Hz); 1.77-1.64 (m, 2H); 1.57-1.47 (m, 2H); 1.29-1.15 (m, 12H); 0.99 (t, 3H,  $J = 7.1$  Hz), 0.92 (t, 3H,  $J = 6.9$  Hz). <sup>13</sup>C NMR (CDCl<sub>3</sub>, 75 MHz),  $\delta$  ppm: 172.7; 171.6; 133.3; 131.7 (2C); 131.6 (2C); 128.4 (2C); 128.3 (2C); 126.1; 124.7 (t,  $^1J_{CF} = 242.9$  Hz); 92.0; 89.6; 76.1; 61.3; 46.2 (t,  $^2J_{CF} = 25.1$  Hz); 36.5 (dd,  $^3J = 5.0$  Hz,  $^3J_{CF} = 2.0$  Hz); 35.9 (t,  $^2J_{CF} = 25.1$  Hz); 32.0; 29.6; 29.5; 29.4; 22.8; 21.0 (t,  $^3J_{CF} = 3.9$  Hz); 14.1; 13.8. <sup>19</sup>F NMR (C<sub>6</sub>D<sub>6</sub>, 282 MHz),  $\delta$  ppm: -102.91 (dq, 1F,  $J_{FF} = 243.9$  Hz,  $J_{FH} = 16.5$  Hz); -104.75 (dq, 1F,  $J_{FF} = 243.9$  Hz,  $J_{FH} = 16.1$  Hz). HRMS (ESI) calcd for C<sub>31</sub>H<sub>37</sub>F<sub>2</sub>NO<sub>2</sub><sup>79</sup>BrNa: [M + Na]<sup>+</sup> : m/z 516.26901. Found: m/z 516.2689 (0 ppm).

## 8. Analysis of $^{19}\text{F}/^1\text{H}$ HOESY 2D-NMR spectrum of ( $\pm$ )-6a

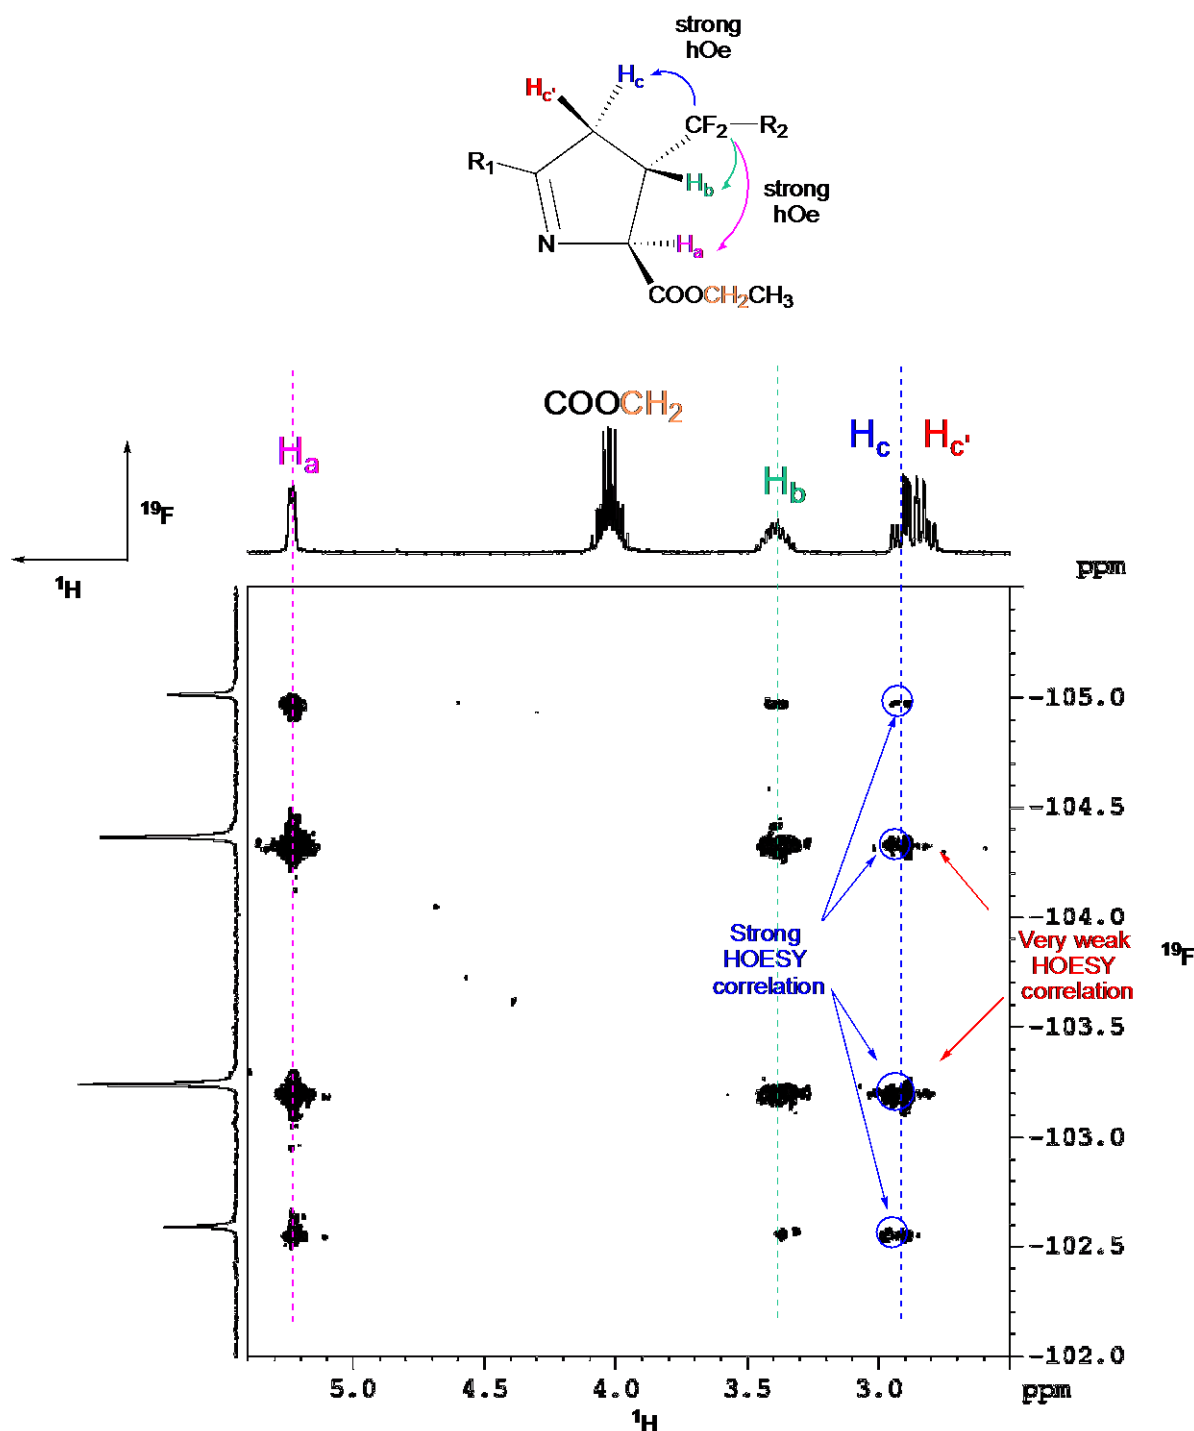

**Figure S-1:** Pulse gradient  $^{19}\text{F}/^1\text{H}$  HOESY 2D-NMR spectrum of ( $\pm$ )-6a in  $\text{C}_6\text{D}_6$  recorded at 300 K and 9.4 T (Bruker avance I NMR spectrometer equipped with a QXO probe, ( $\nu(^{19}\text{F}) = 376,5$  MHz/ $\nu(^1\text{H}) = 400.1$  MHz) and 300 K. The map was recorded using a 2D matrix of  $4096(t_1) \times 256(t_2)$  data points, and then zero-filled to  $4096(t_1) \times 1024(t_2)$  data points. The mixing time was set up at 800 ms. 16 scans were added per  $t_1$  increment. Exponential filtering (LB = 5 Hz) was applied in both spectral dimensions. The  $F_1$  and  $F_2$  projections displayed correspond to  $^{19}\text{F}\{-^1\text{H}\}$  and  $^1\text{H}$  1D spectra, respectively.

## 9. Library of $^1\text{H}$ , $^{13}\text{C}$ - $\{^1\text{H}\}$ , $^{19}\text{F}$ - $\{^1\text{H}\}$ and $^{19}\text{F}$ 1D-NMR spectra

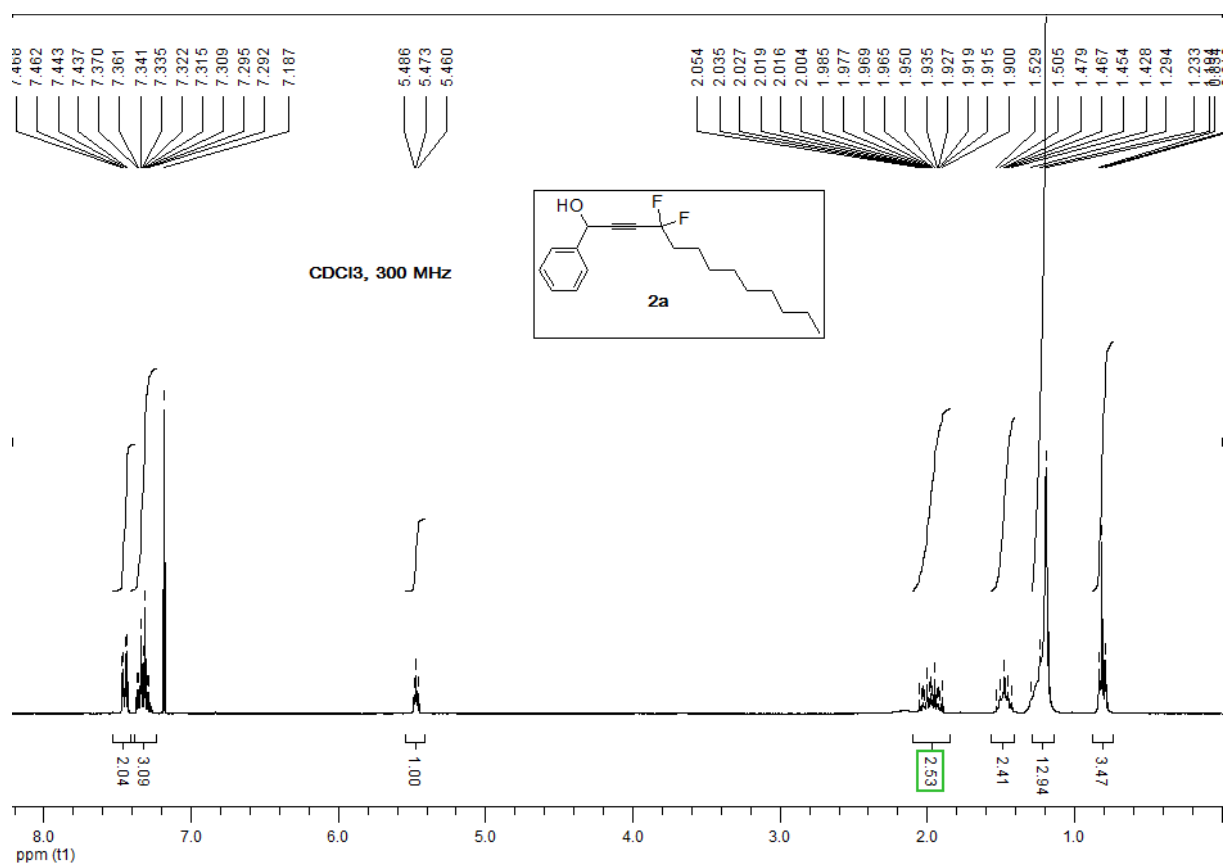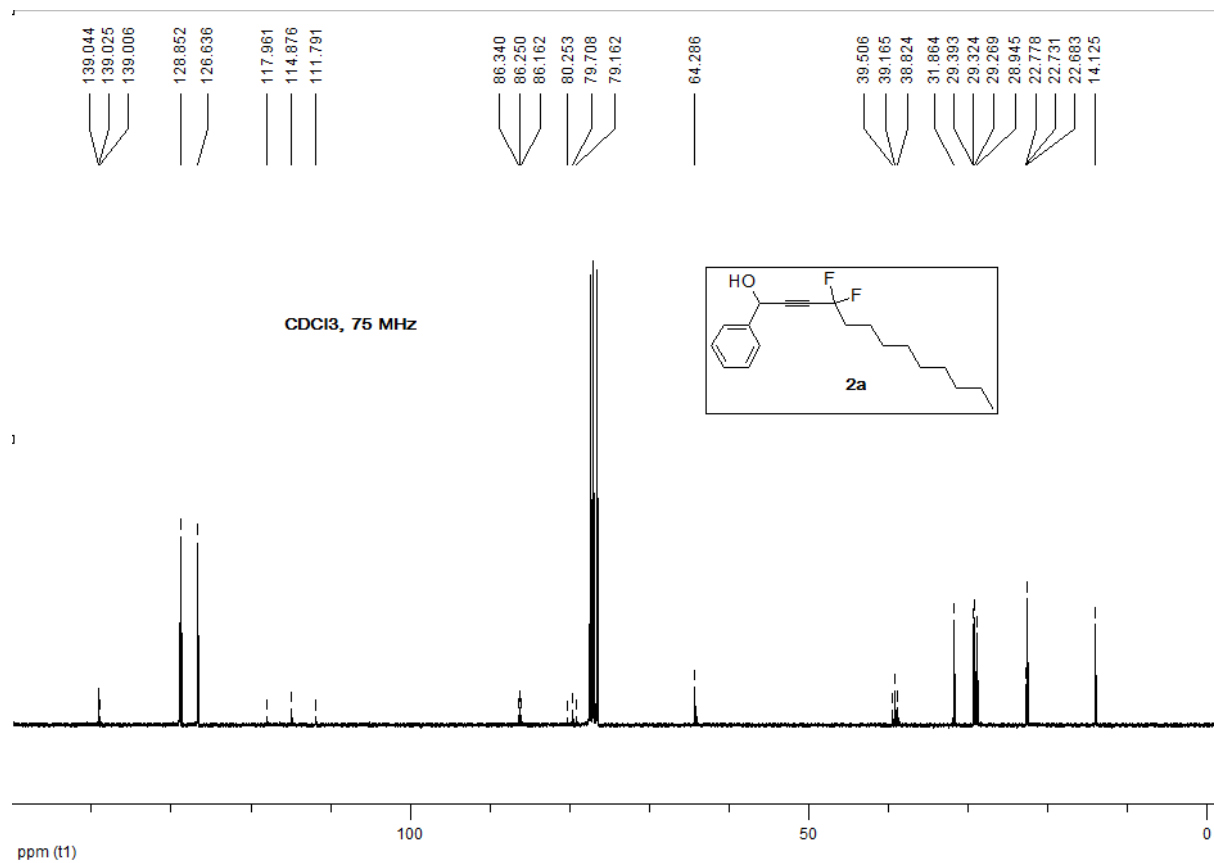

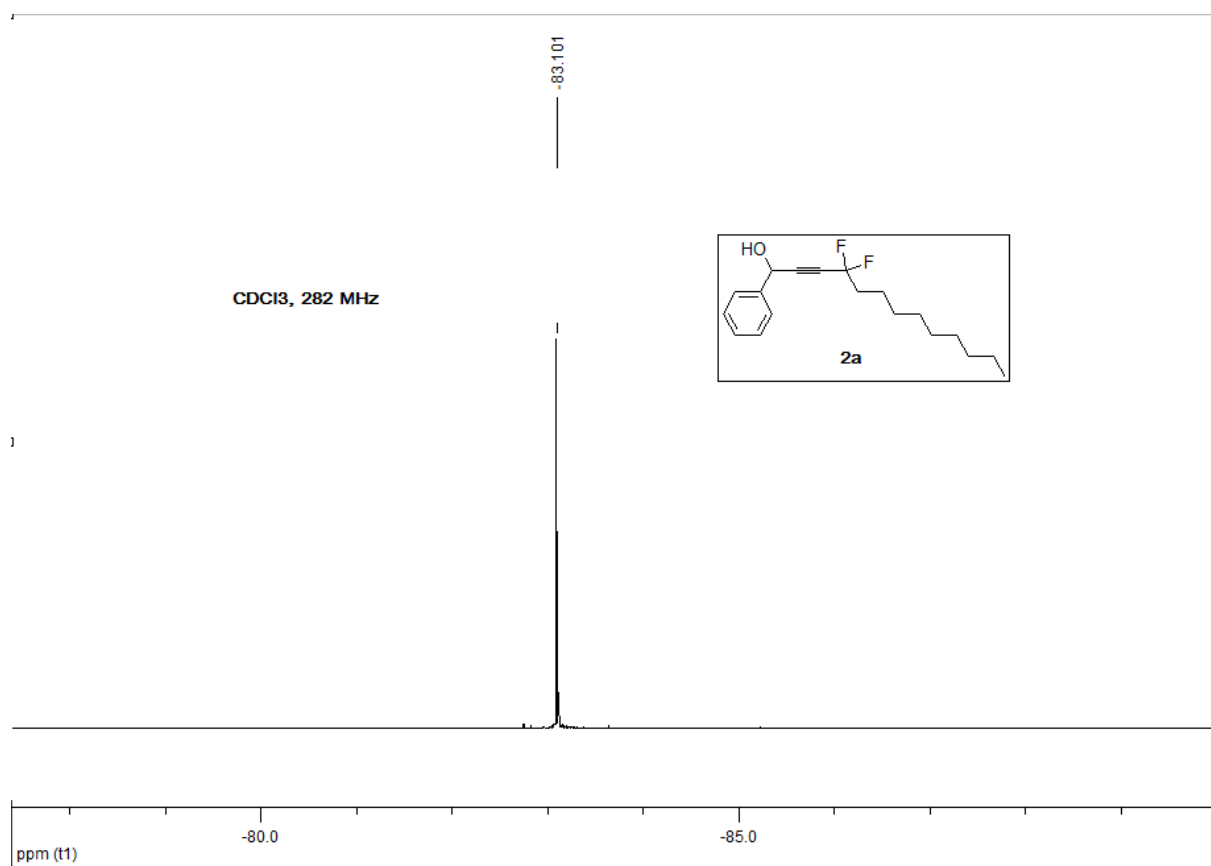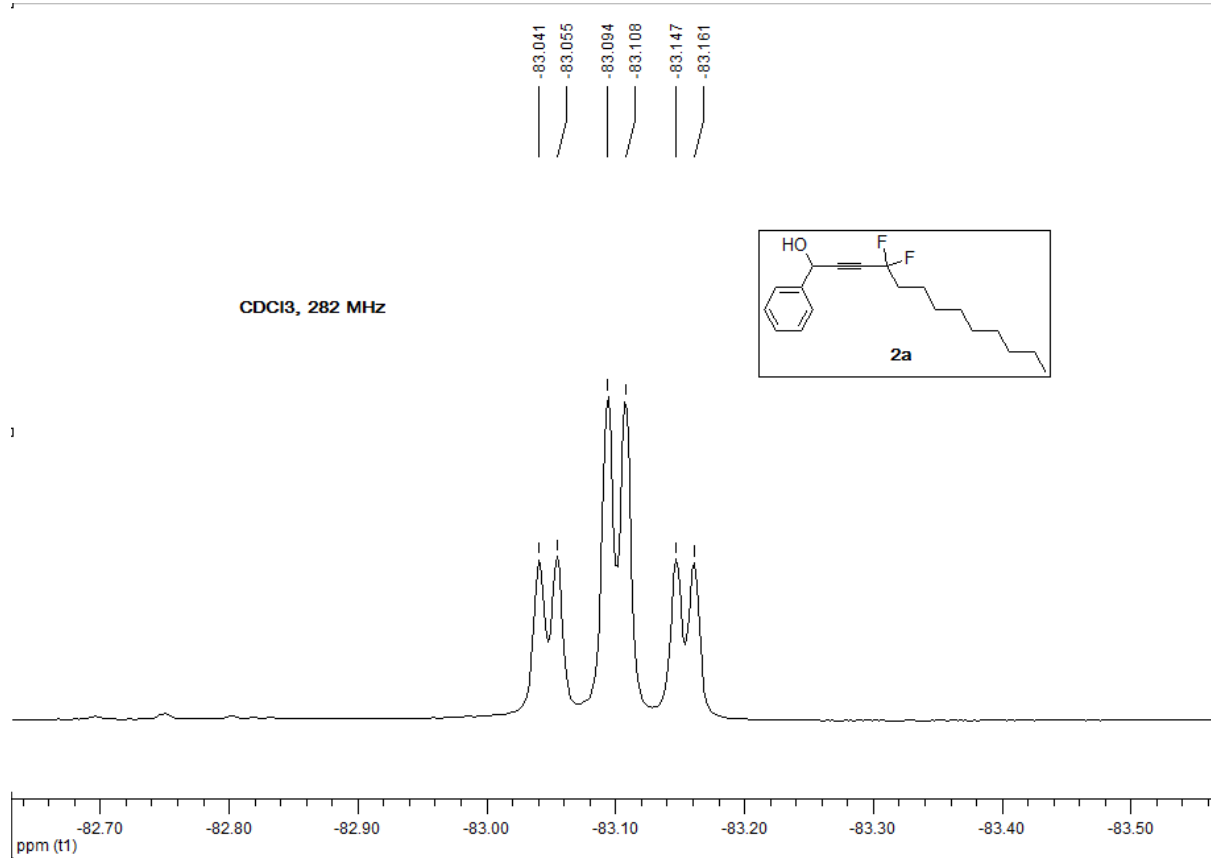

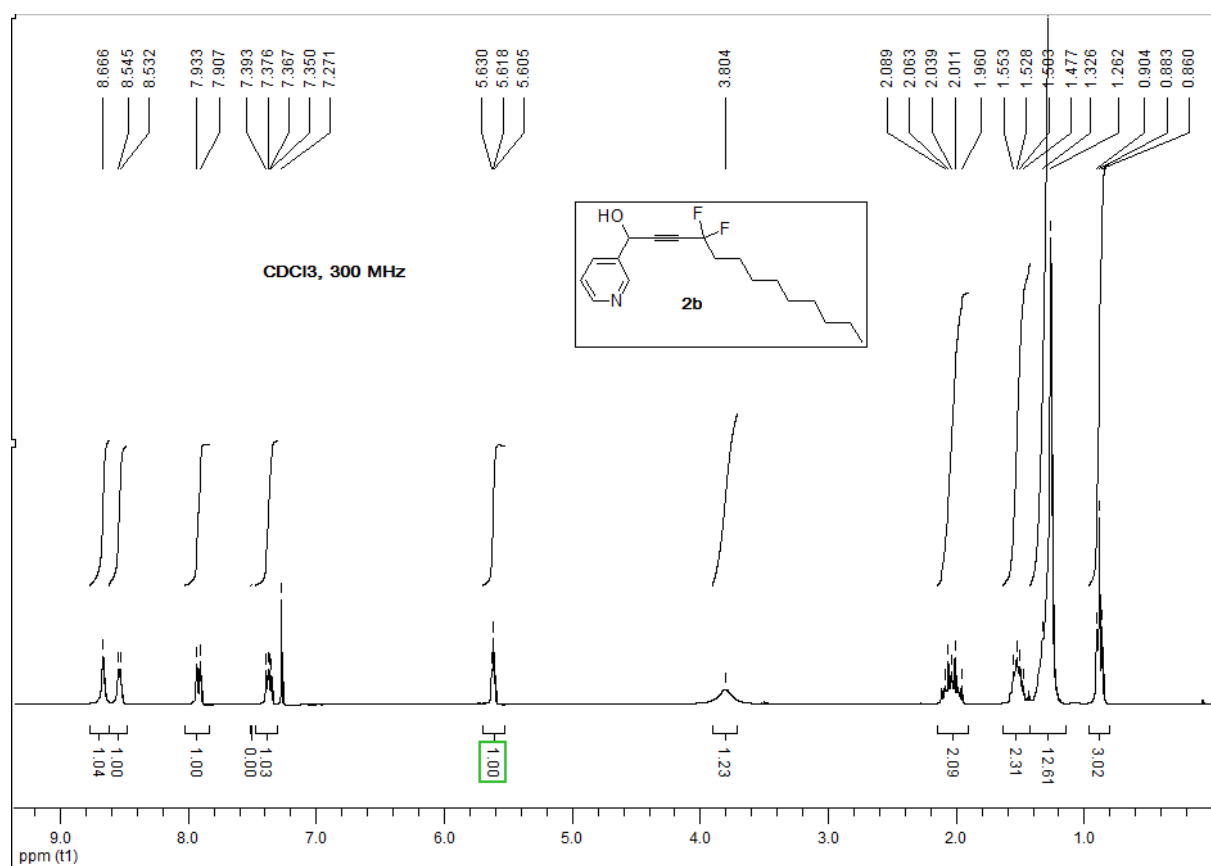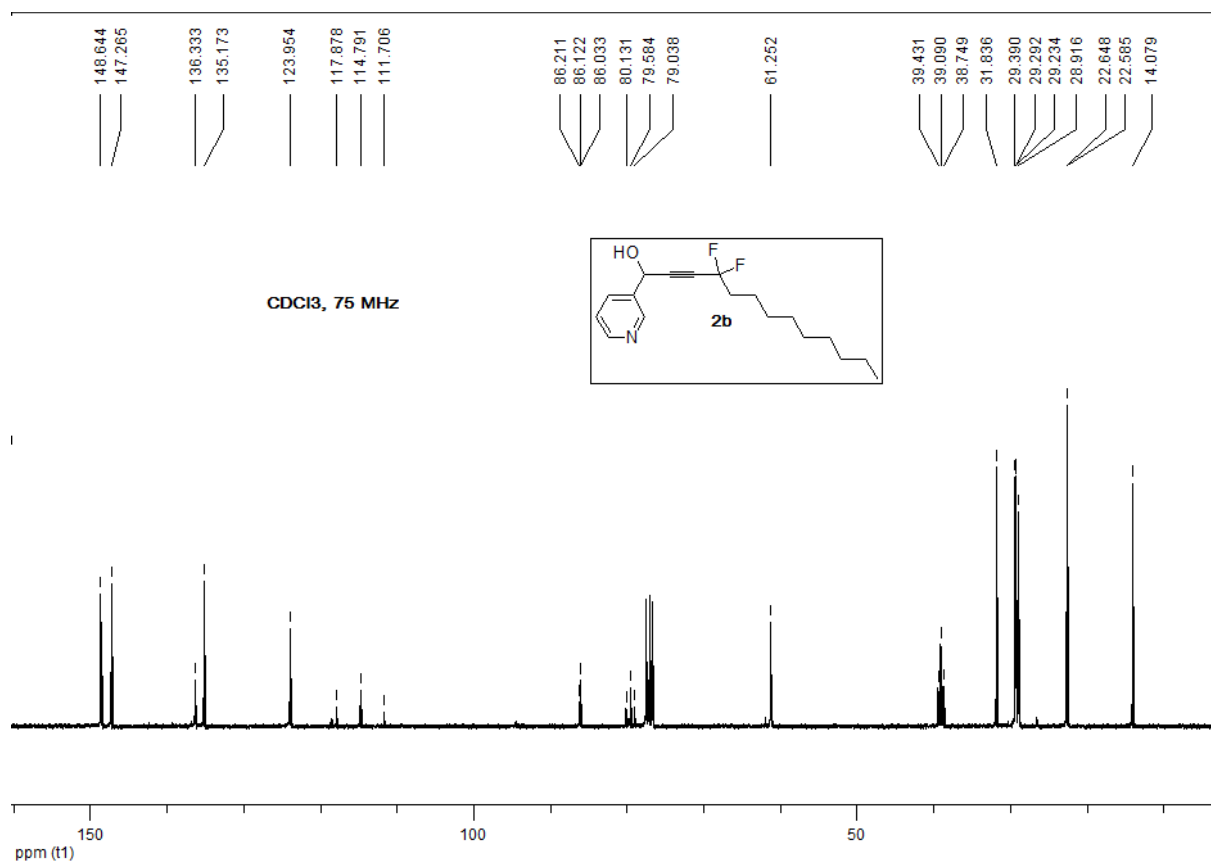

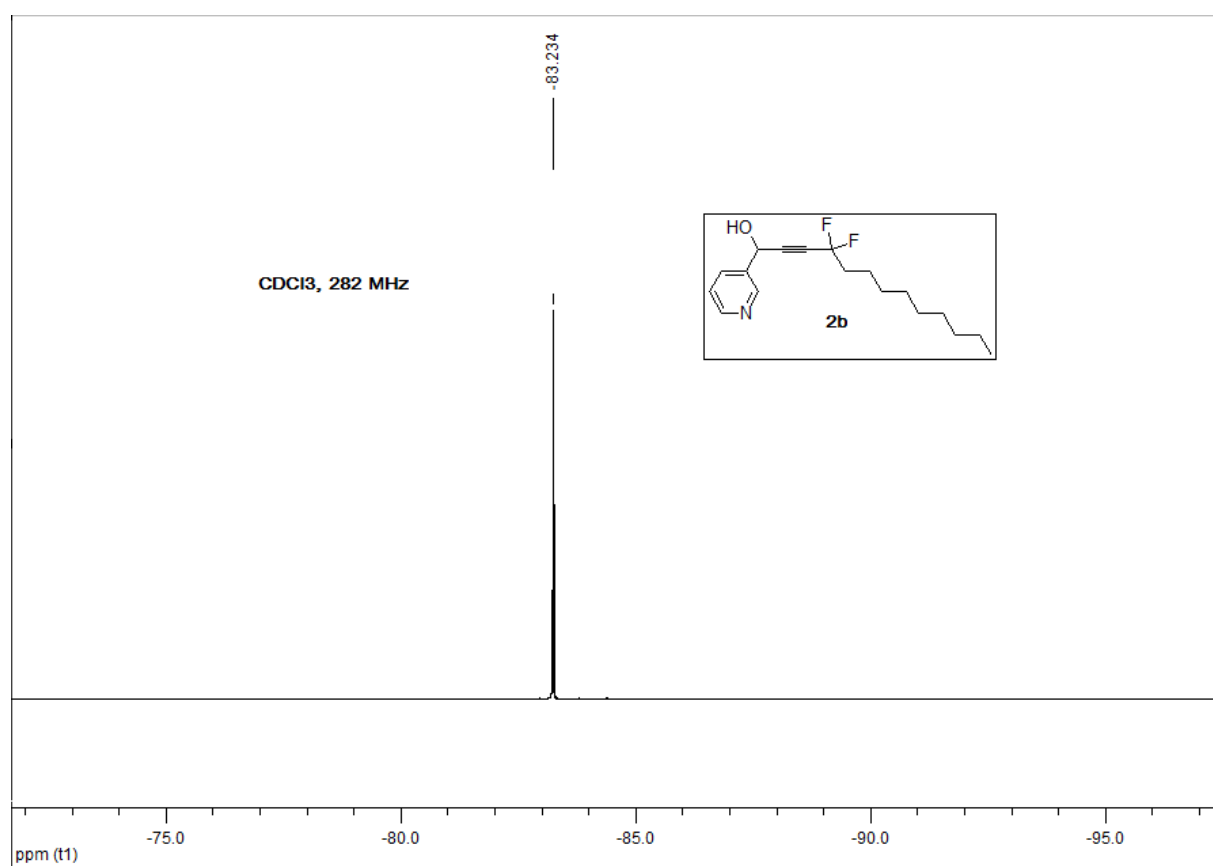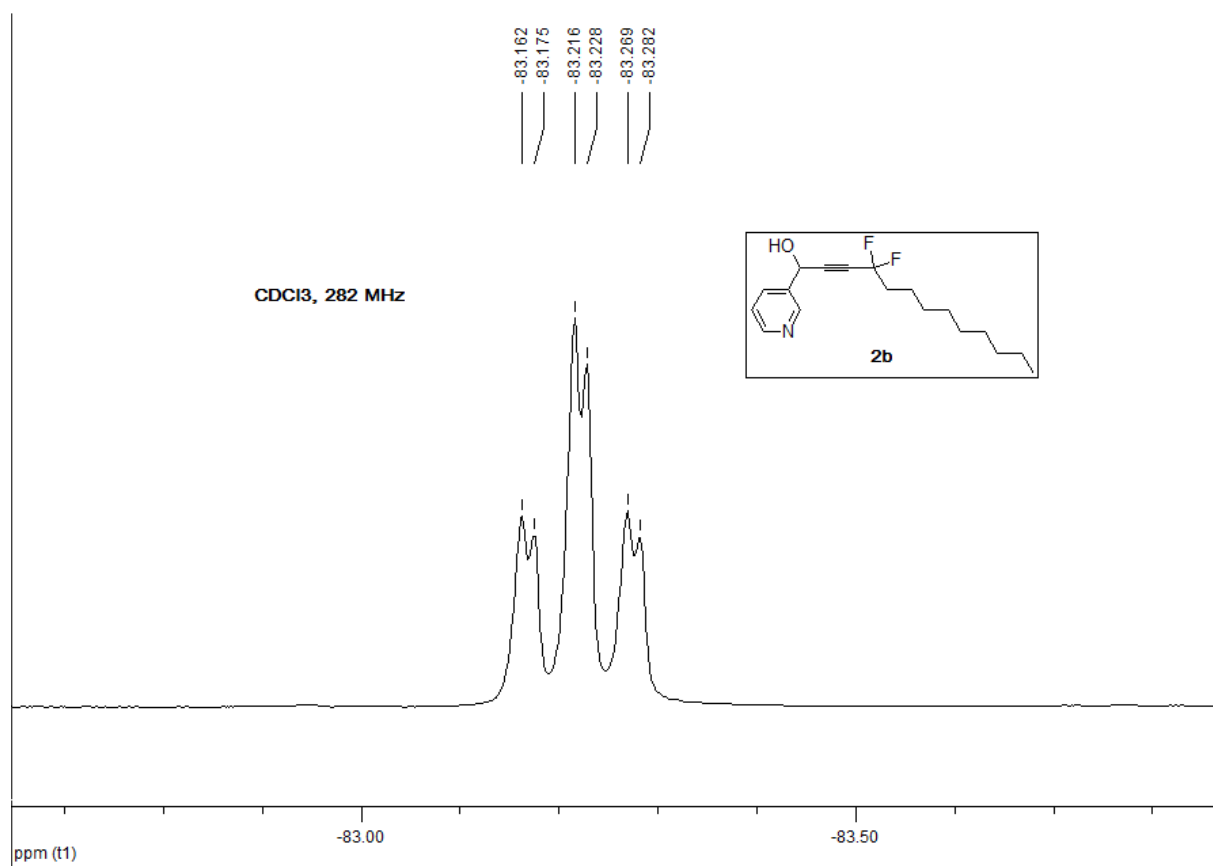



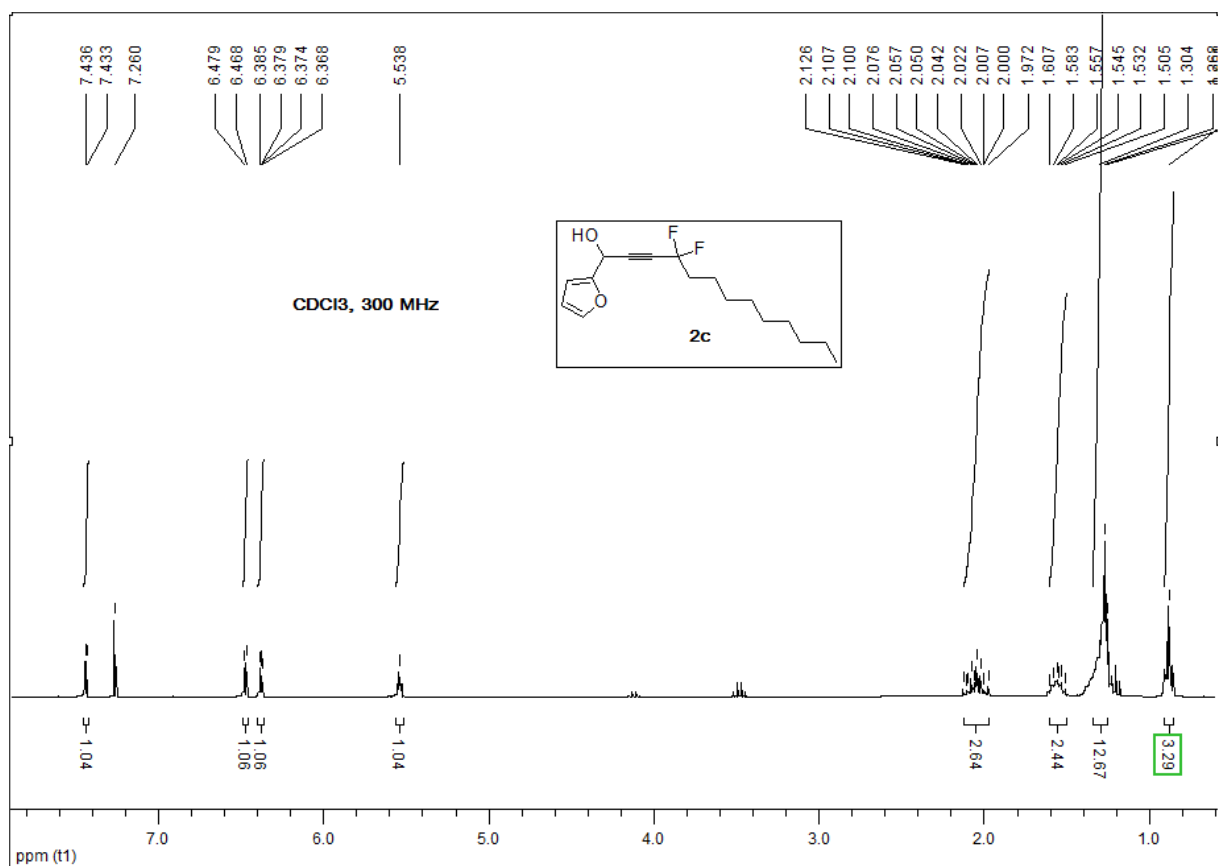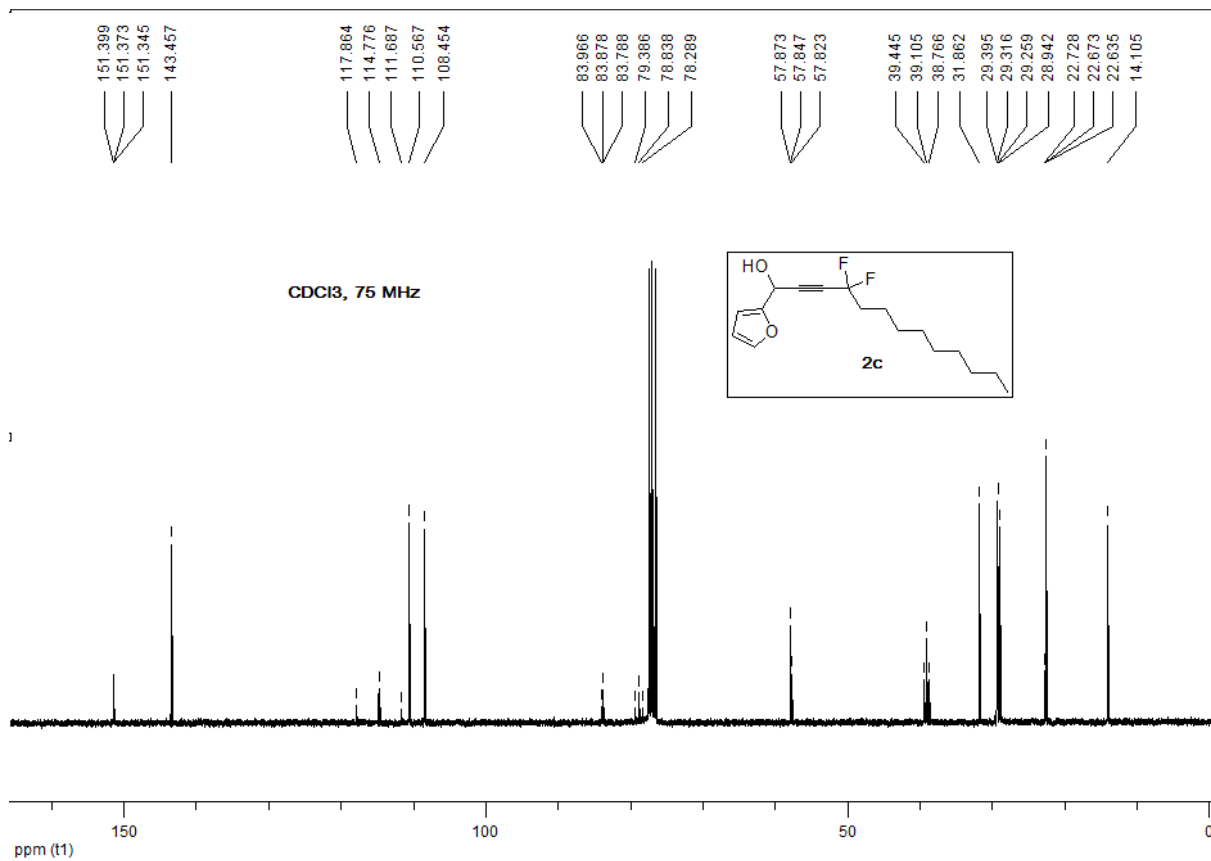

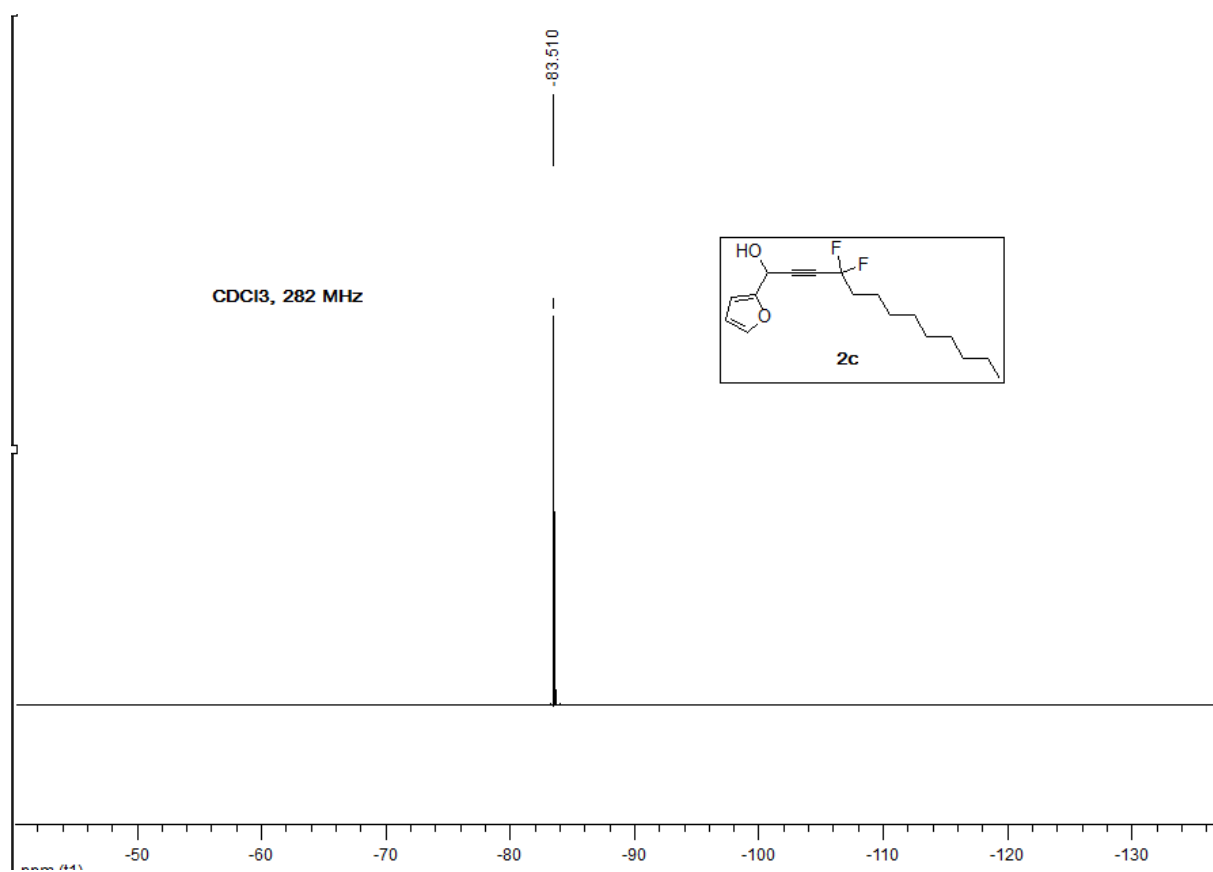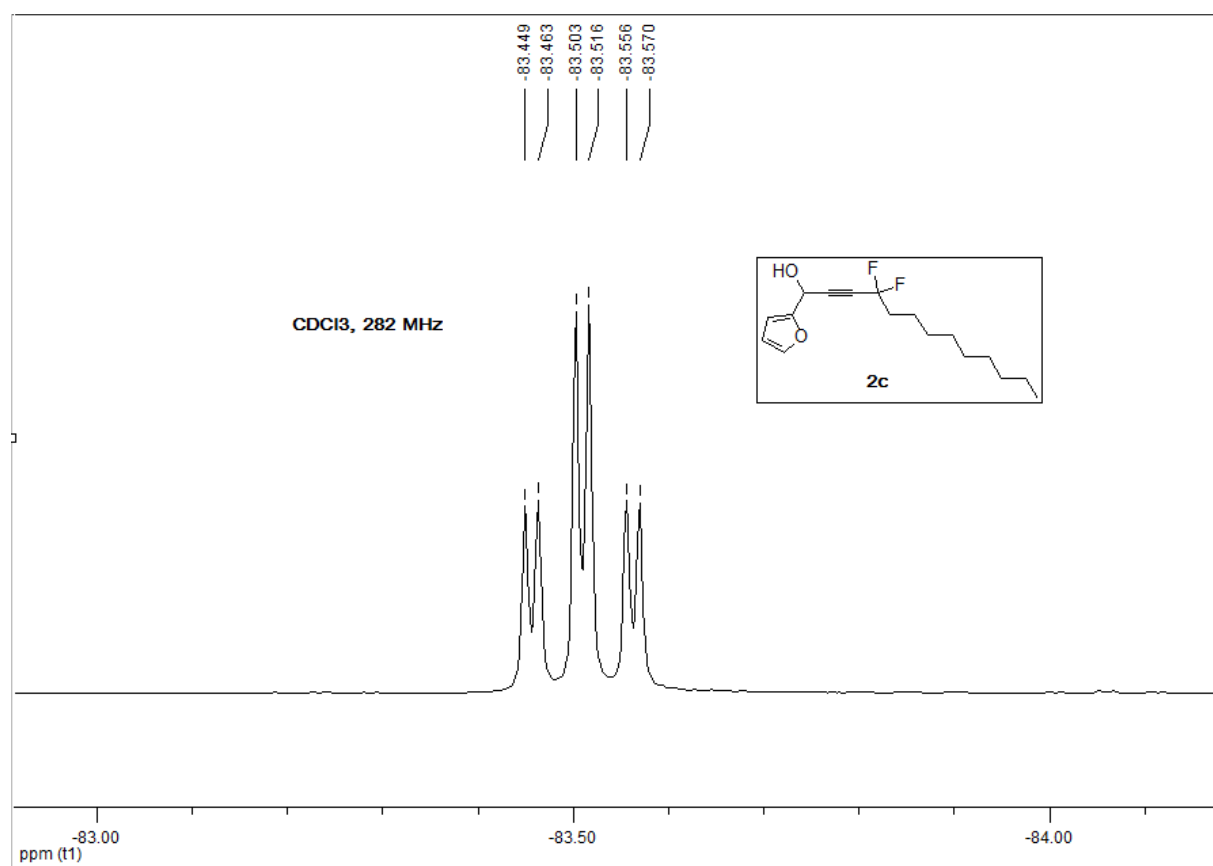

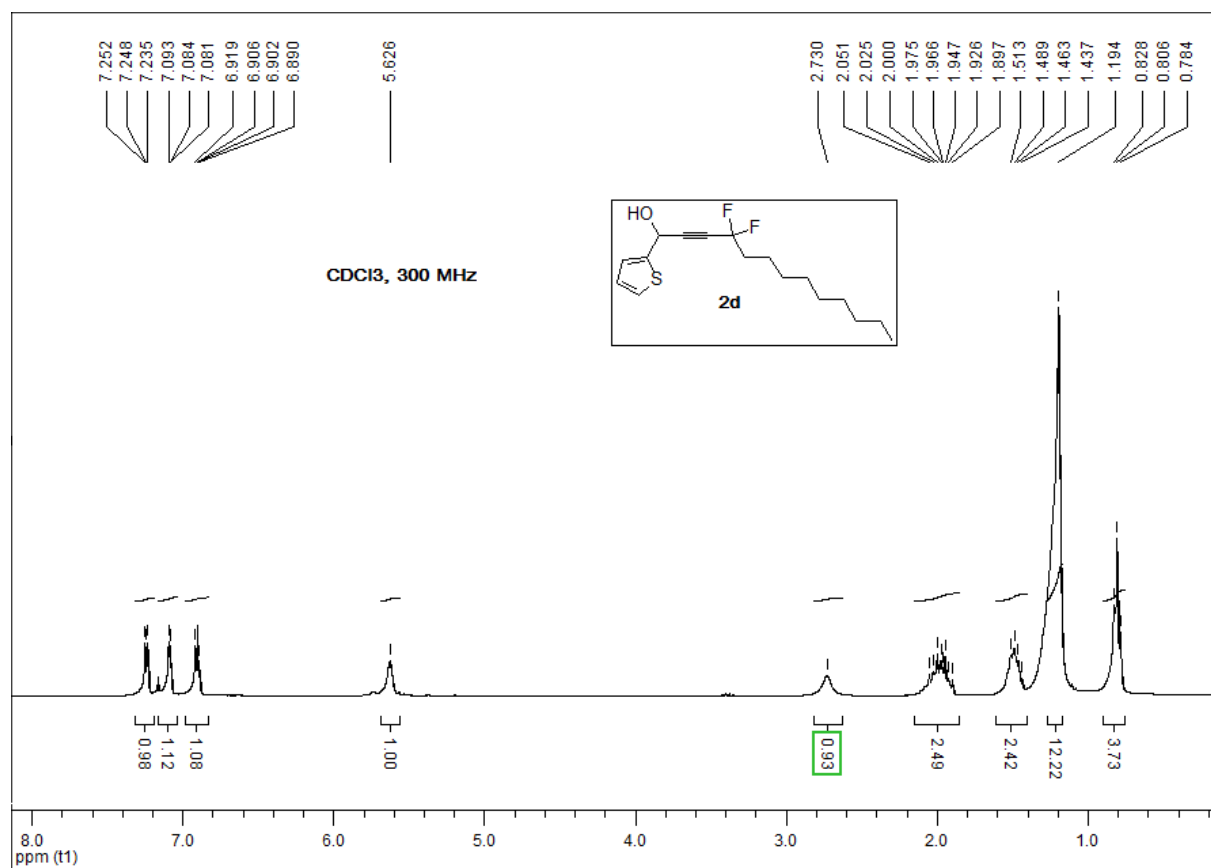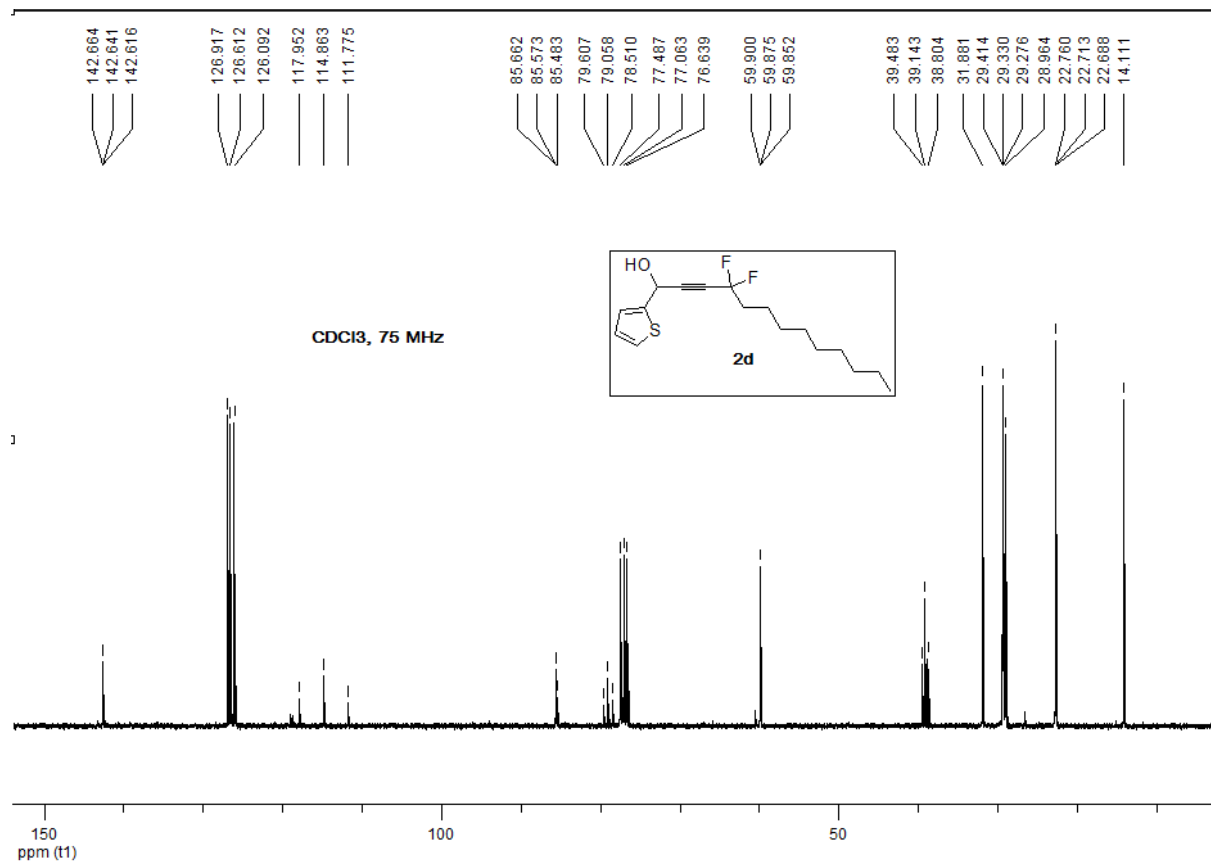

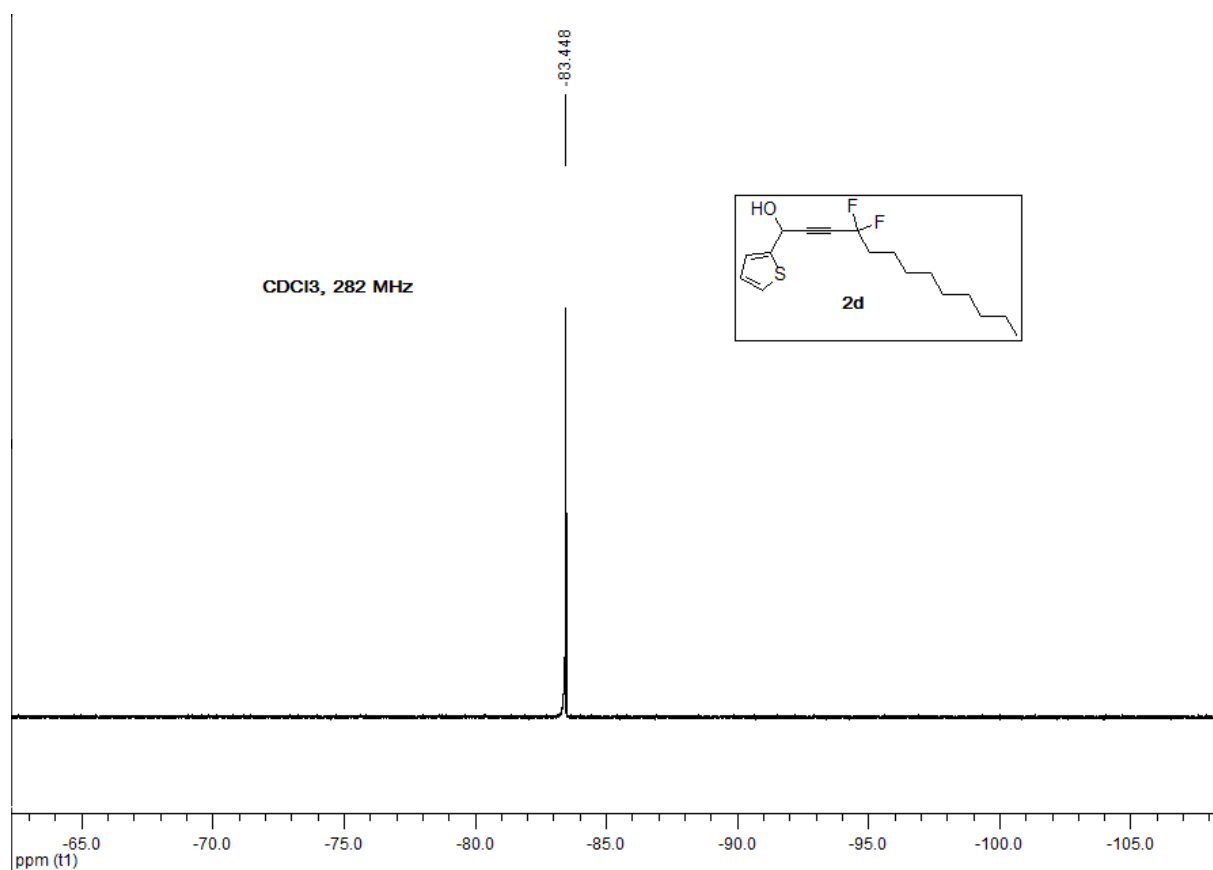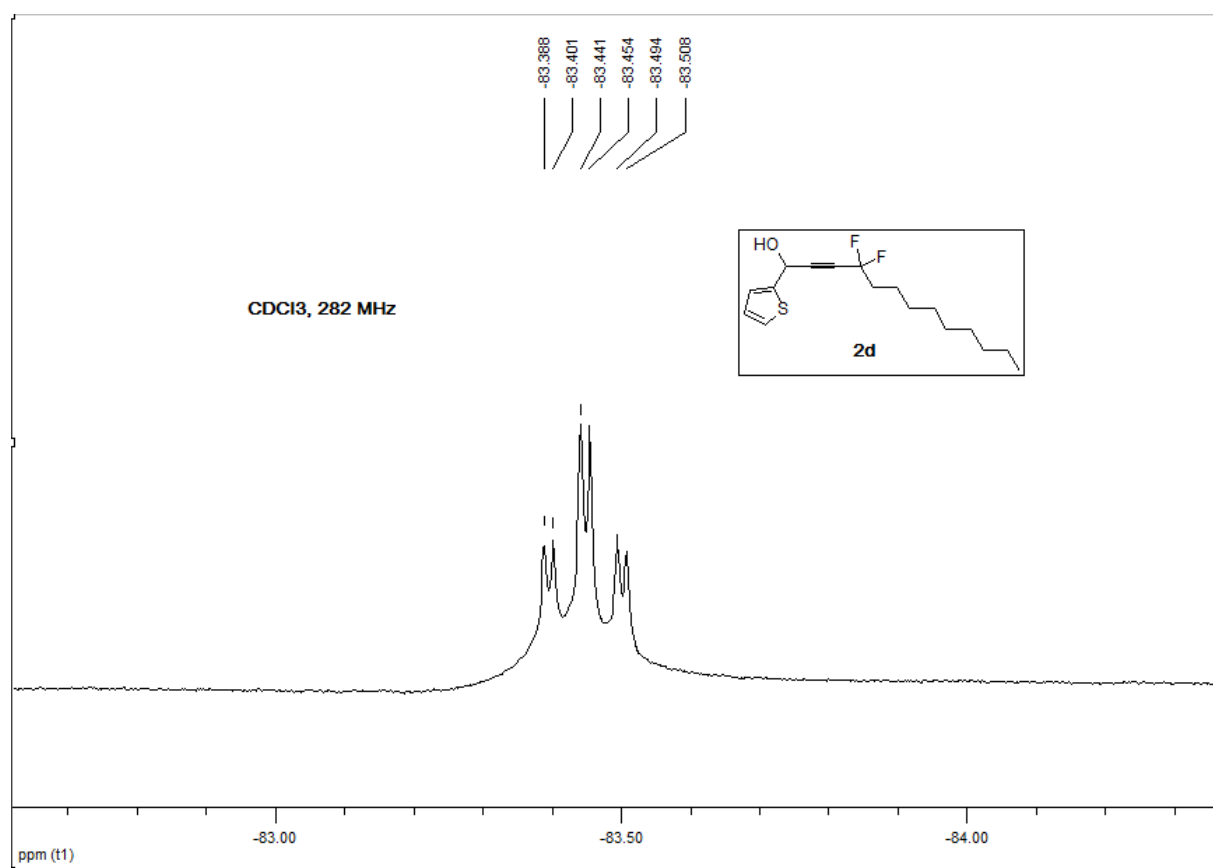

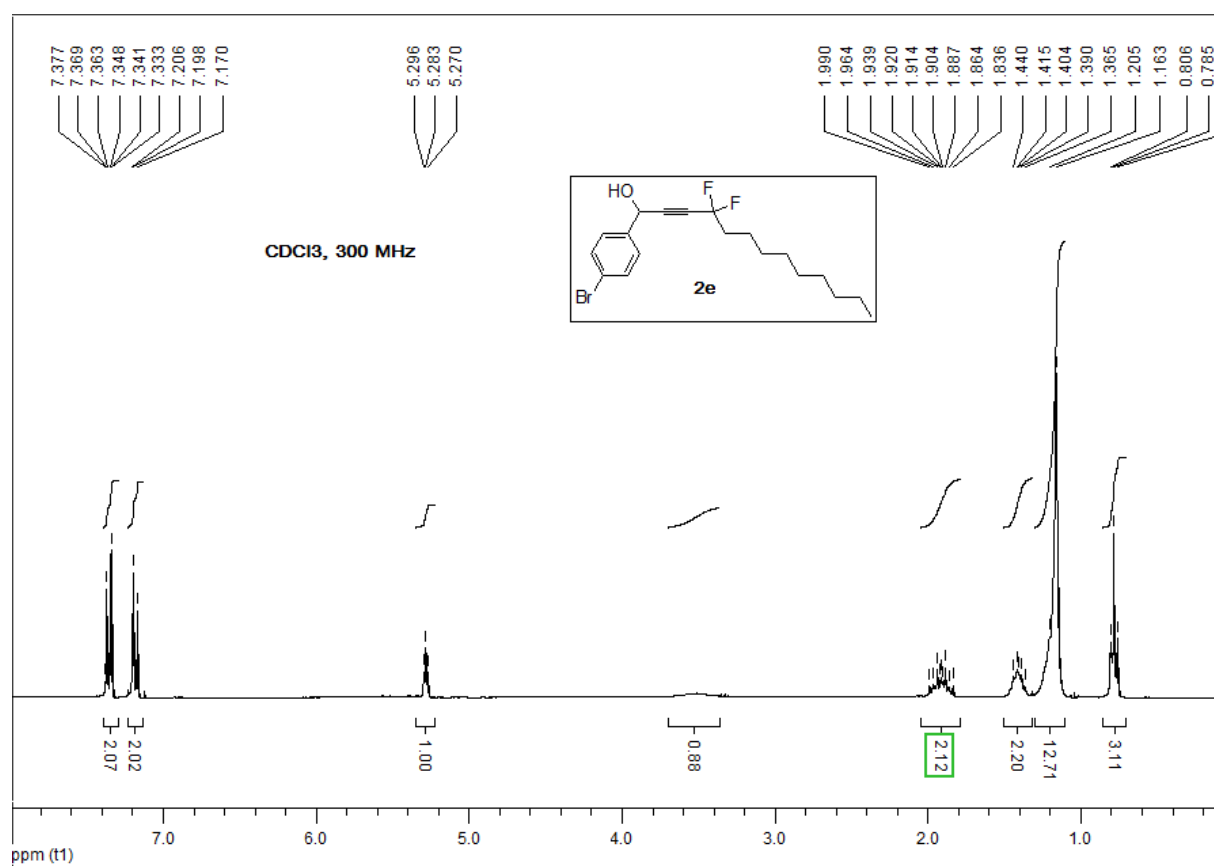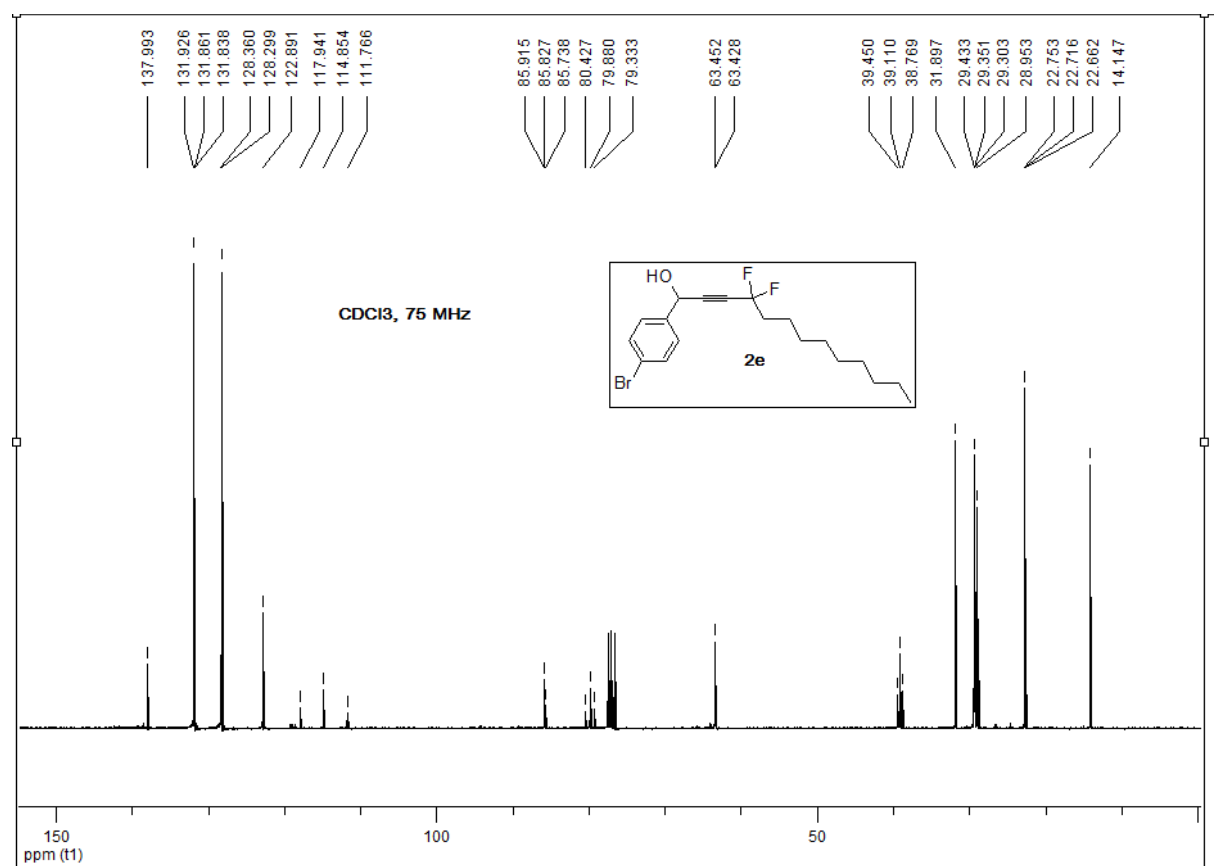

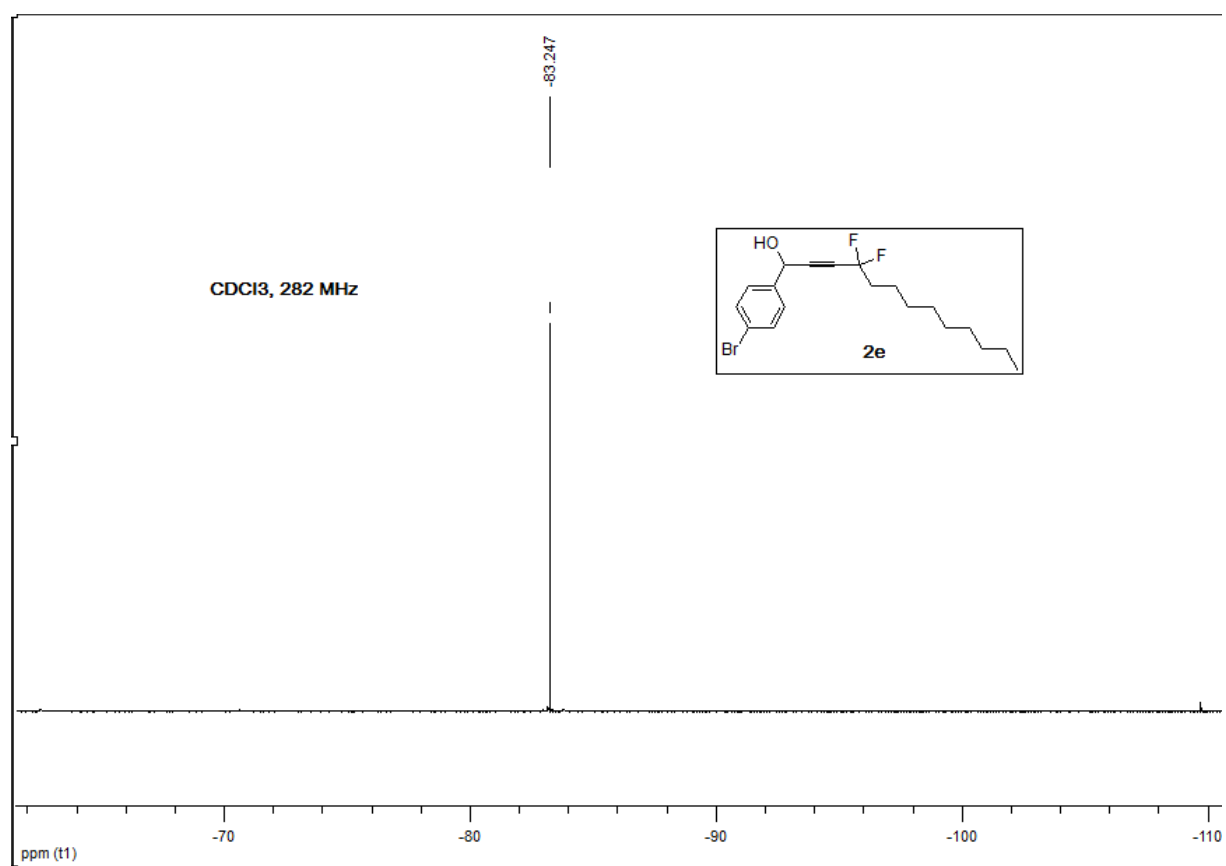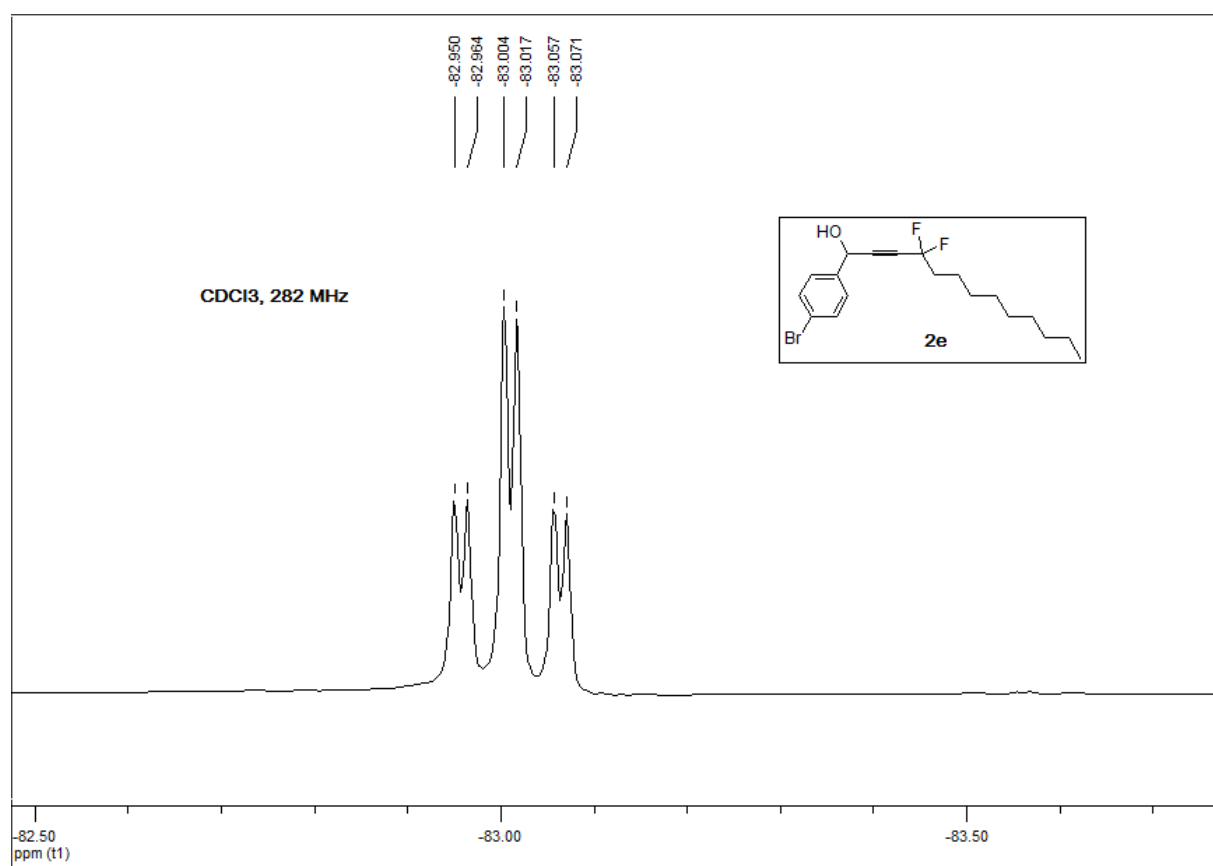

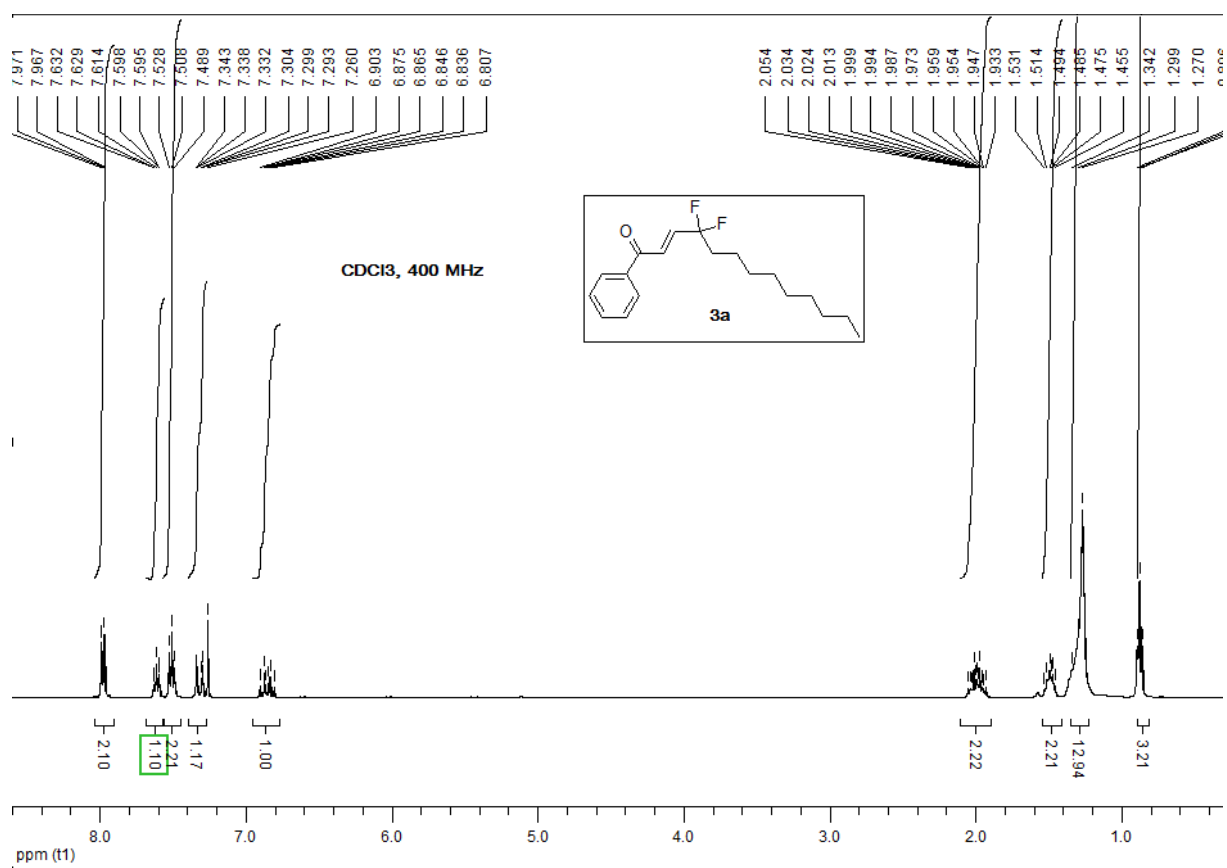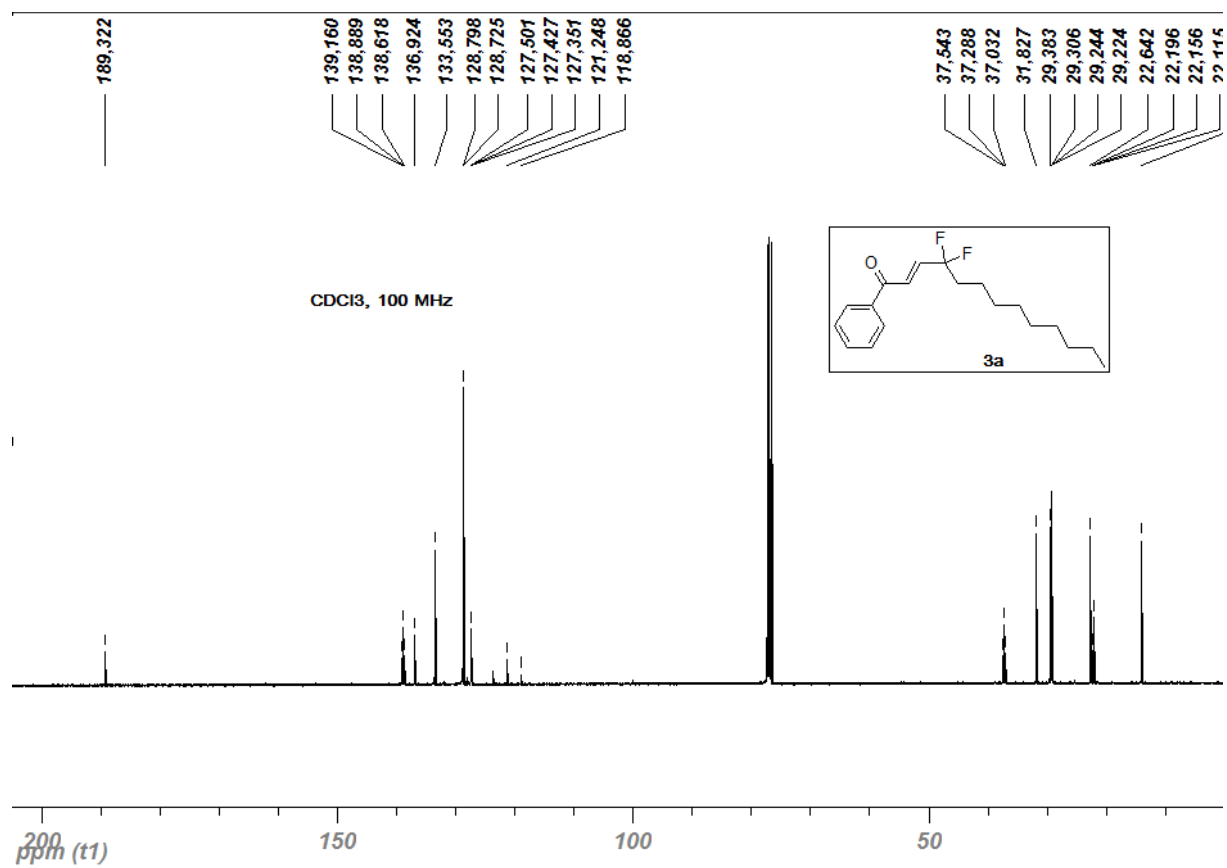

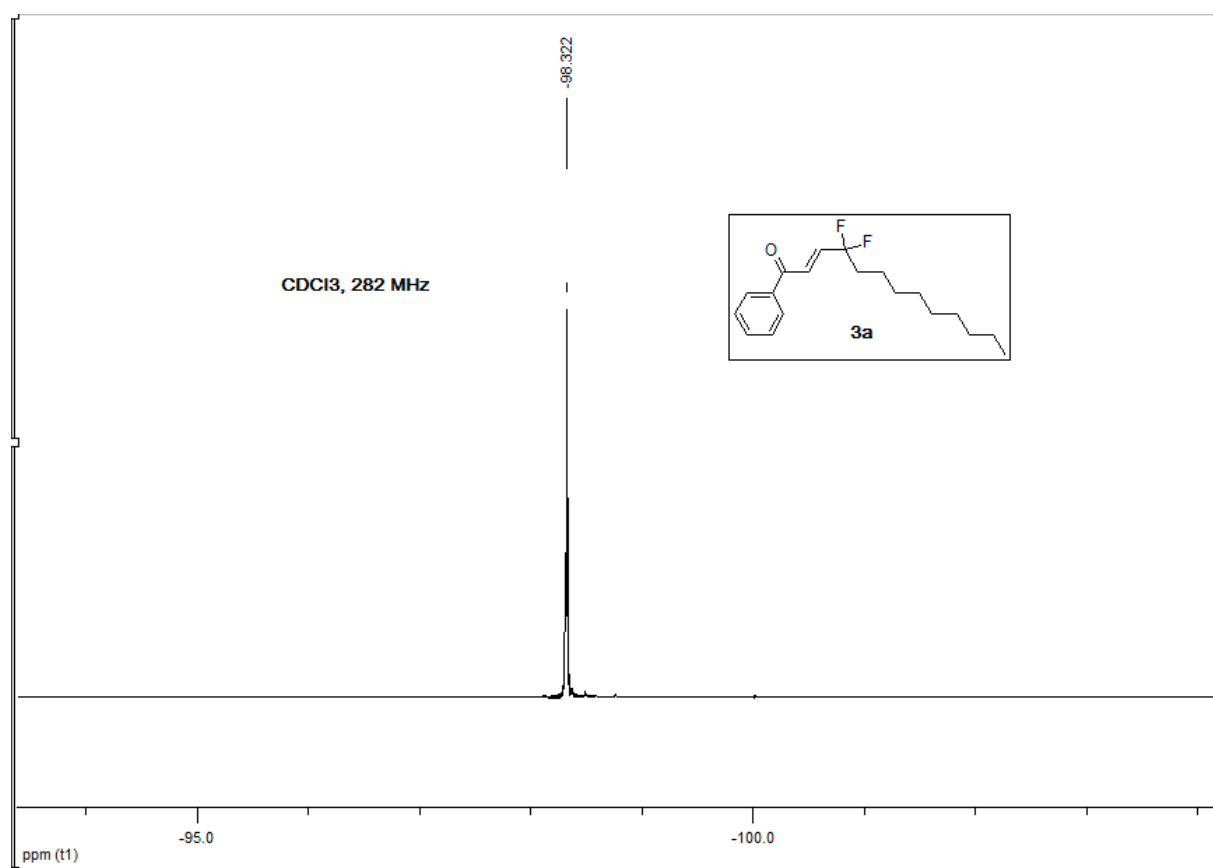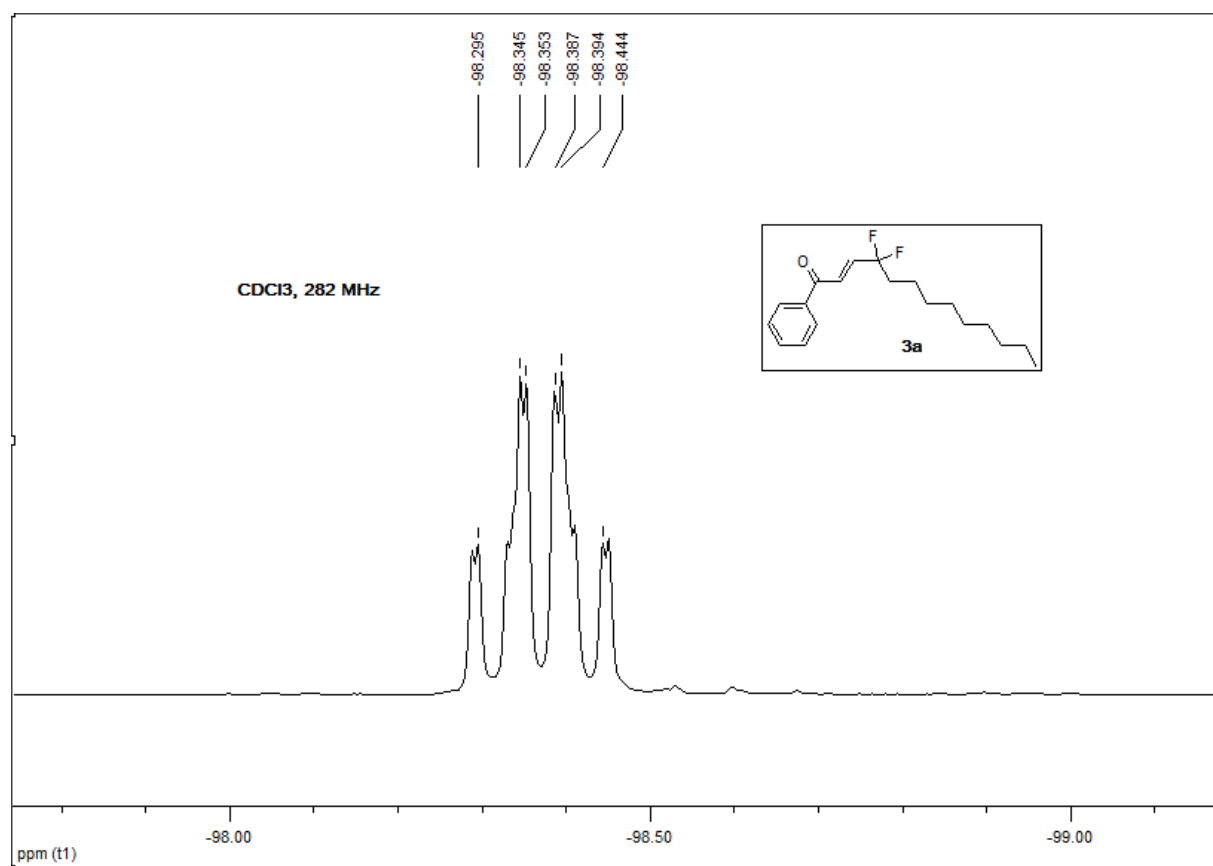



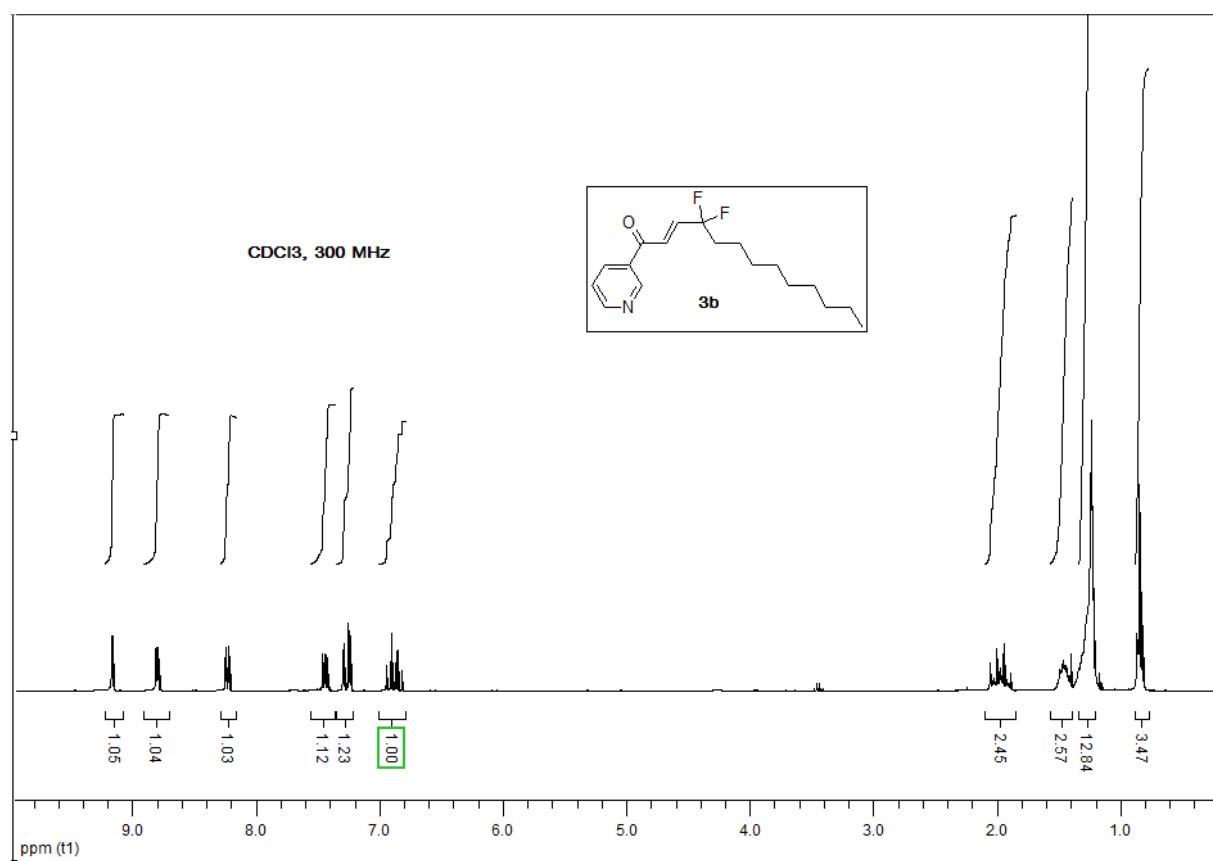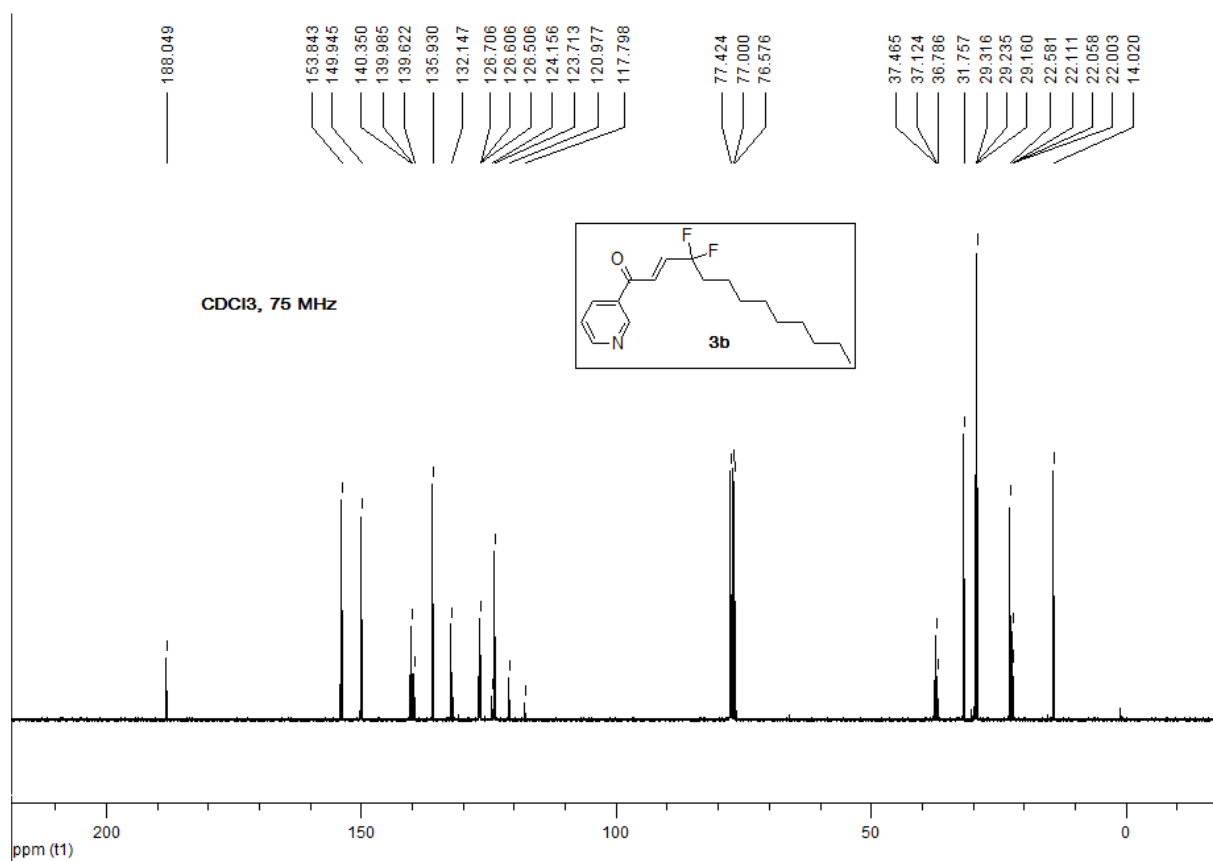

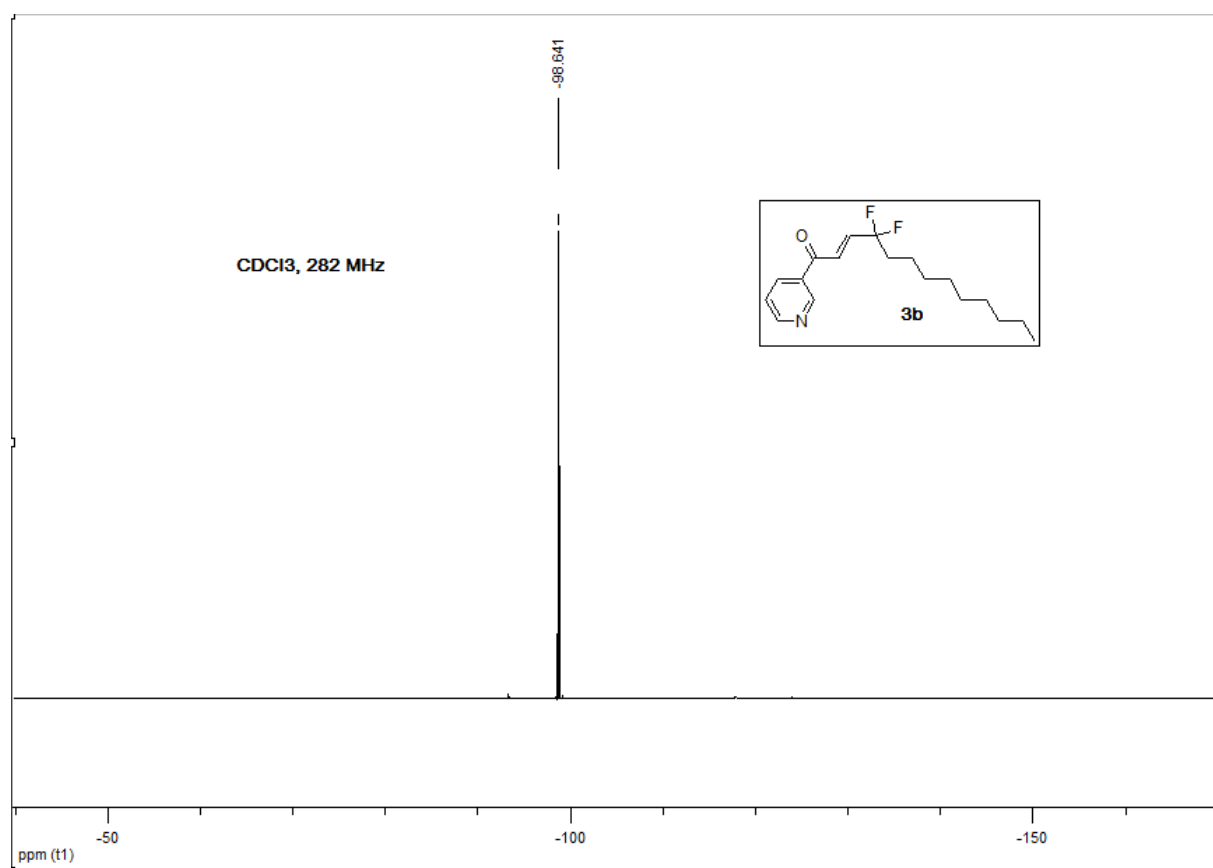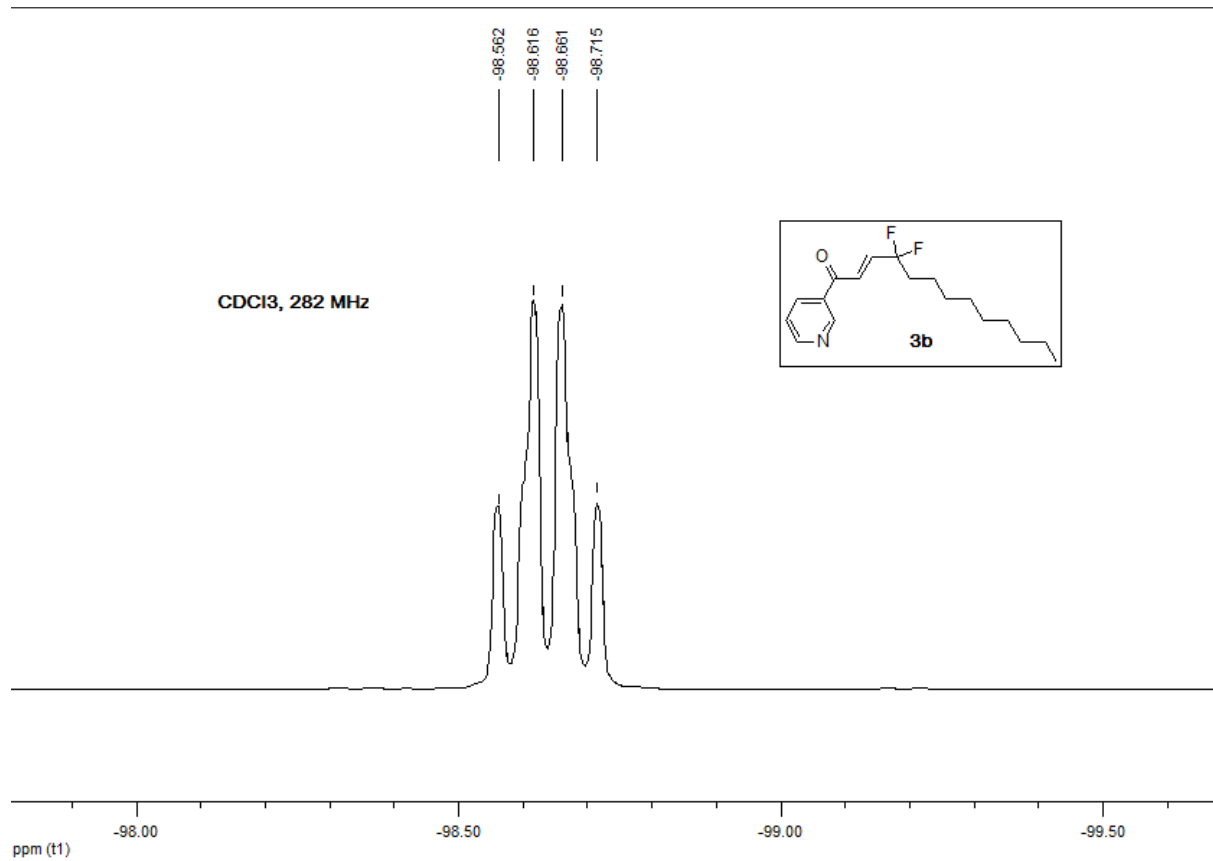

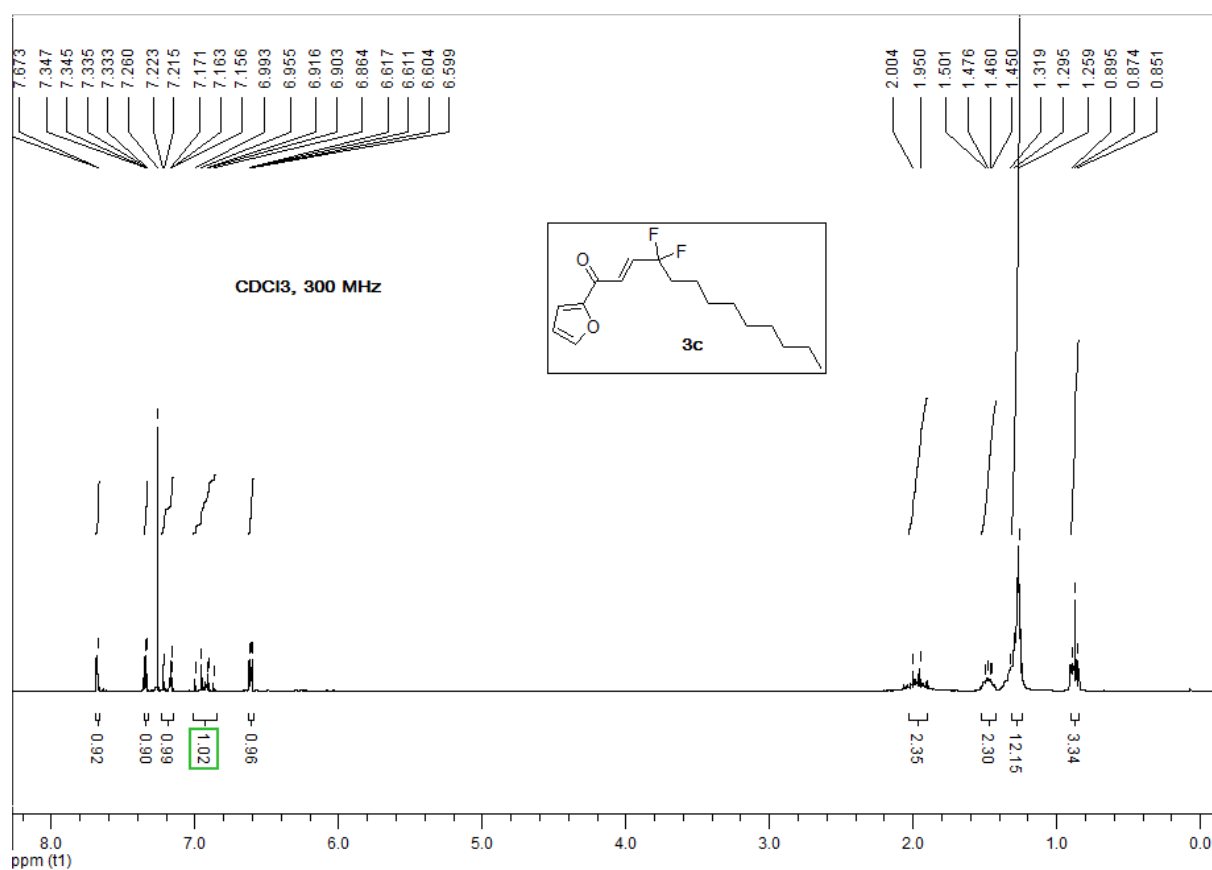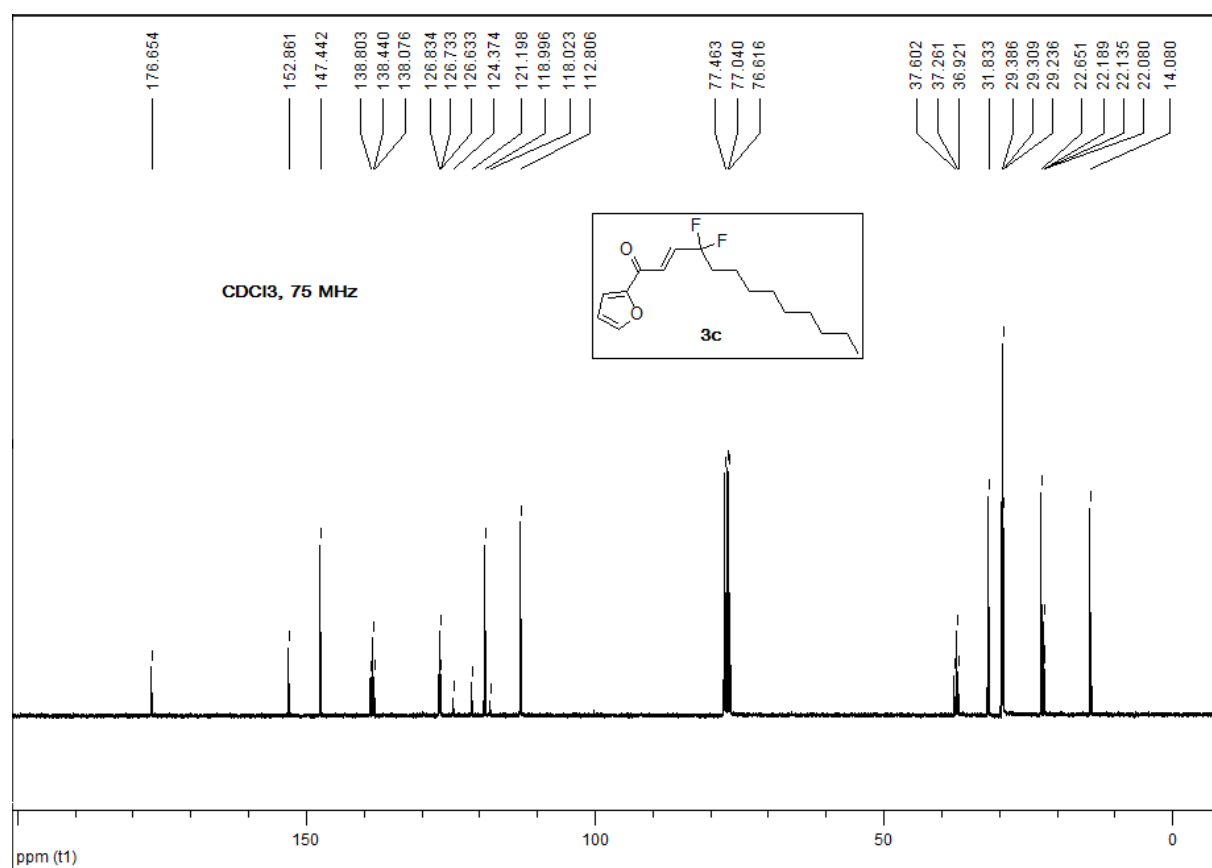

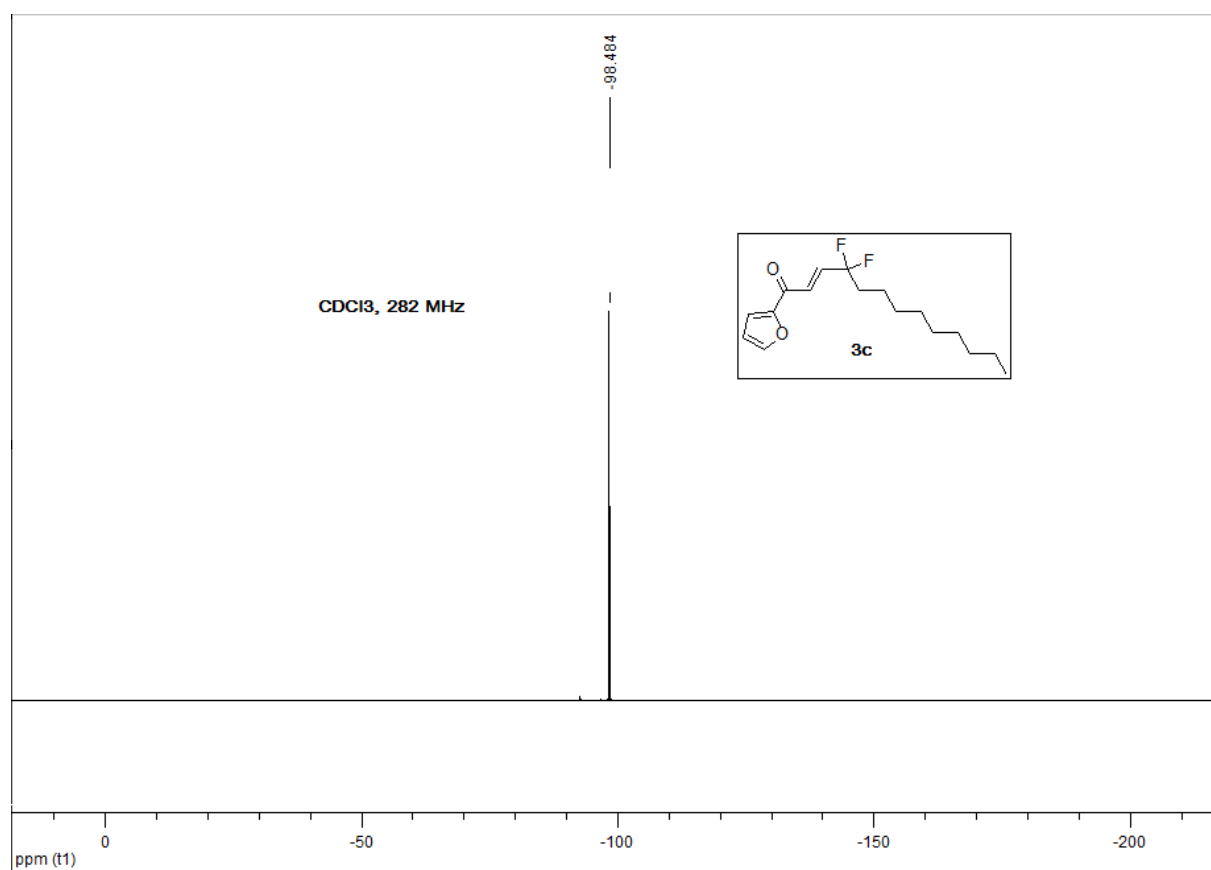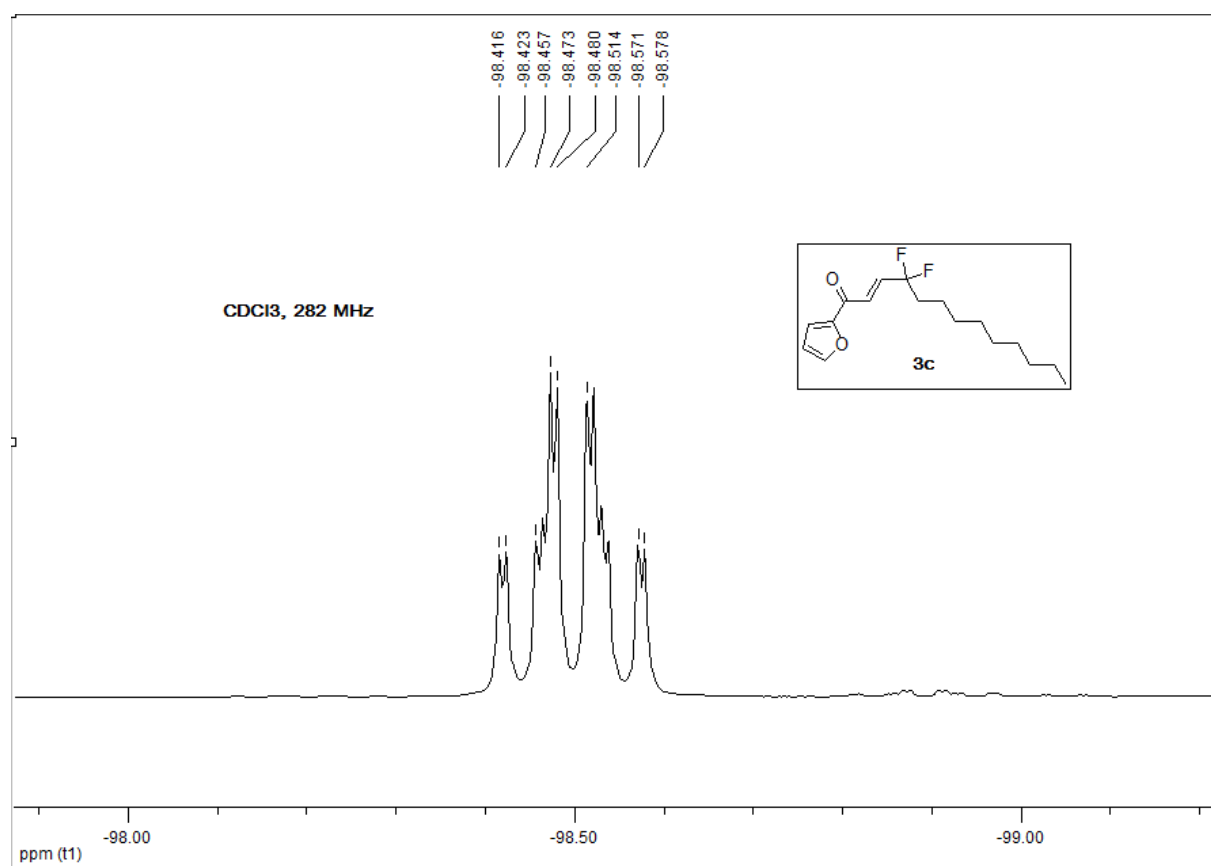

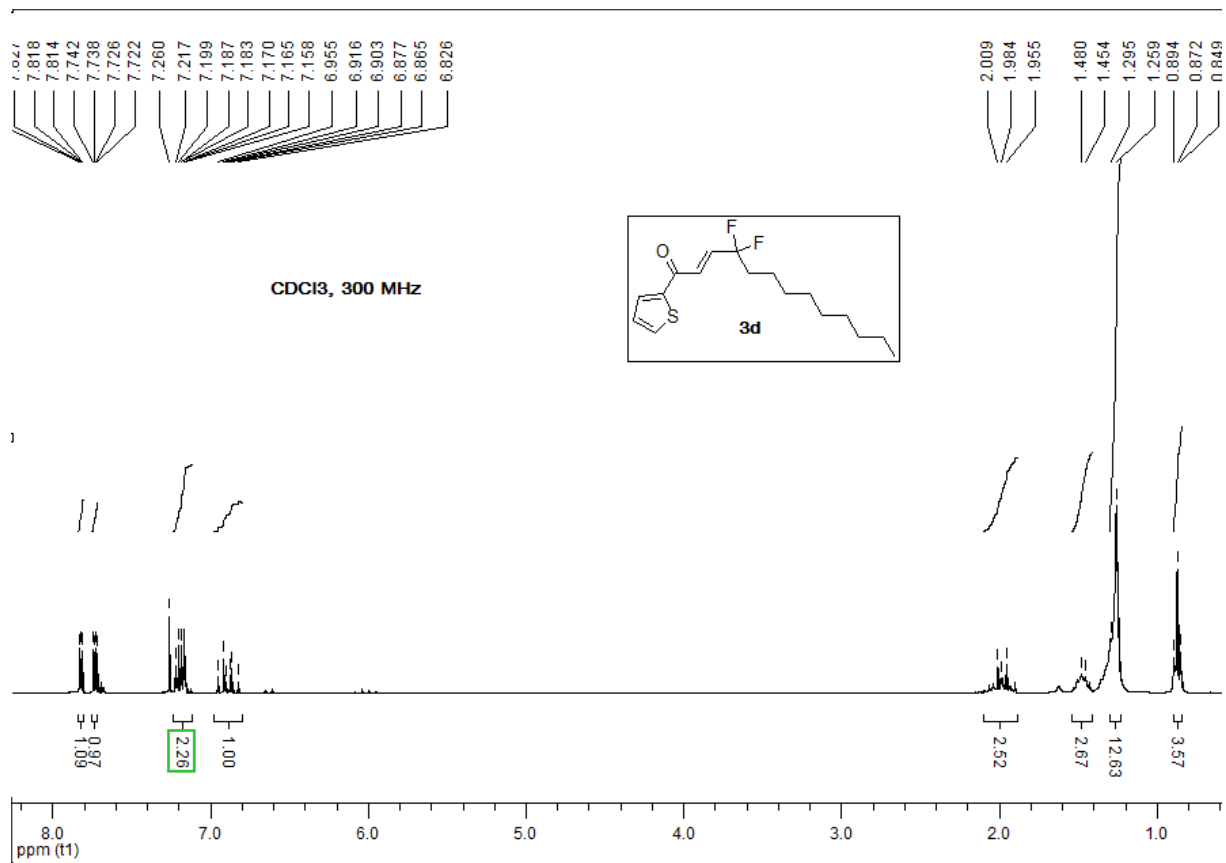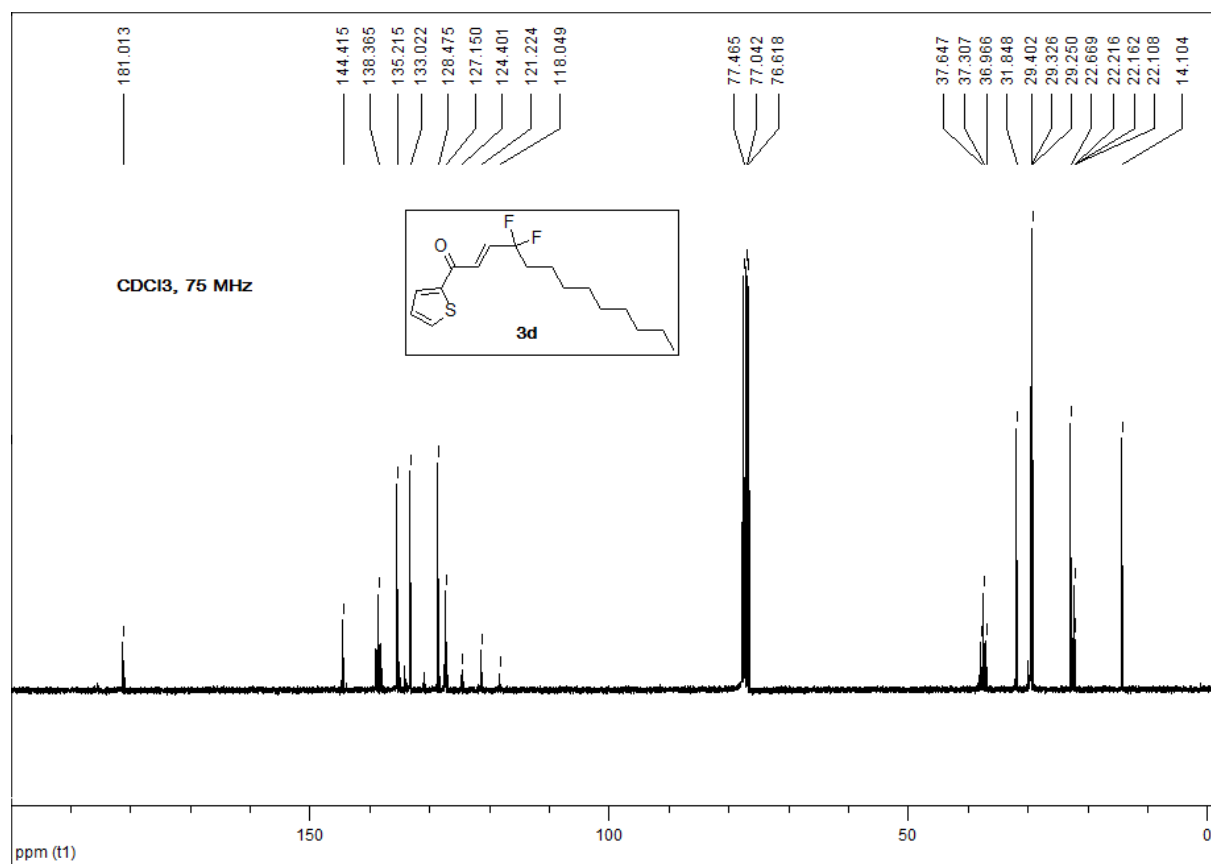

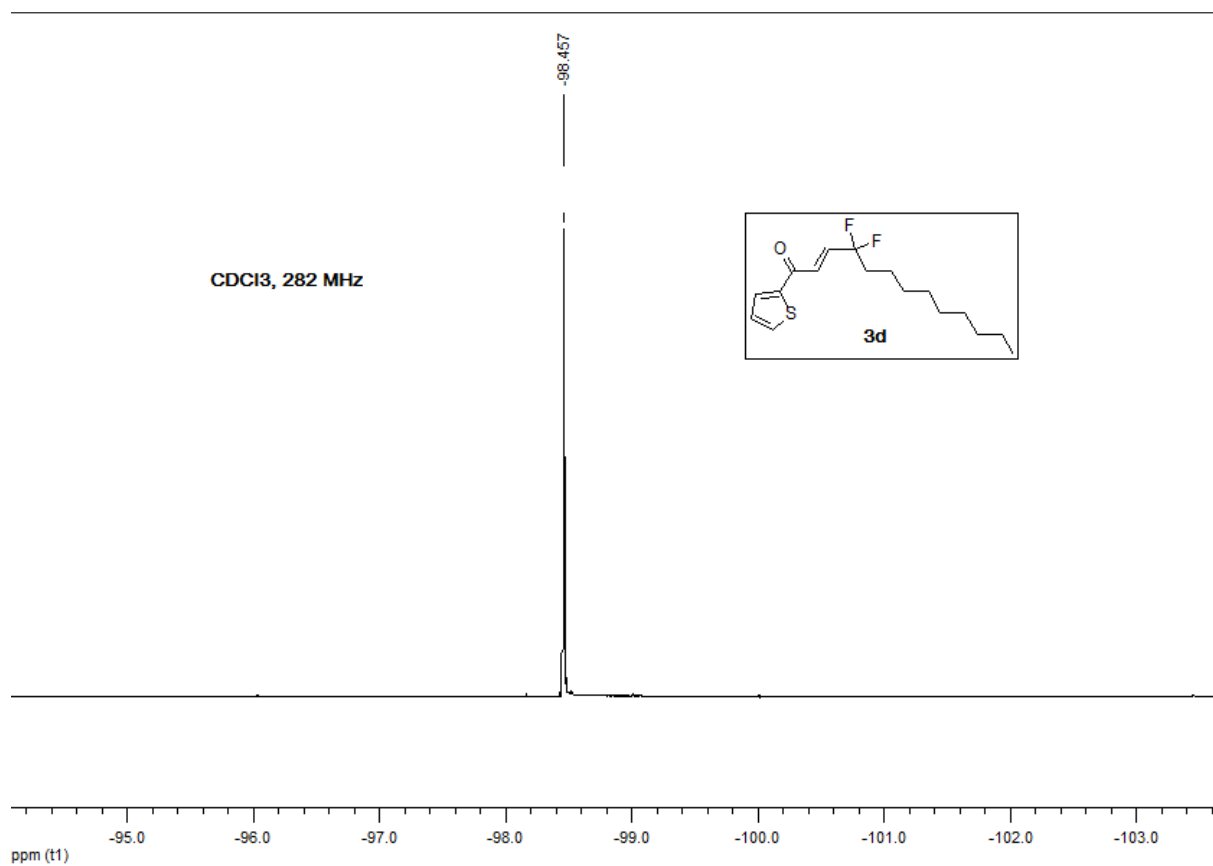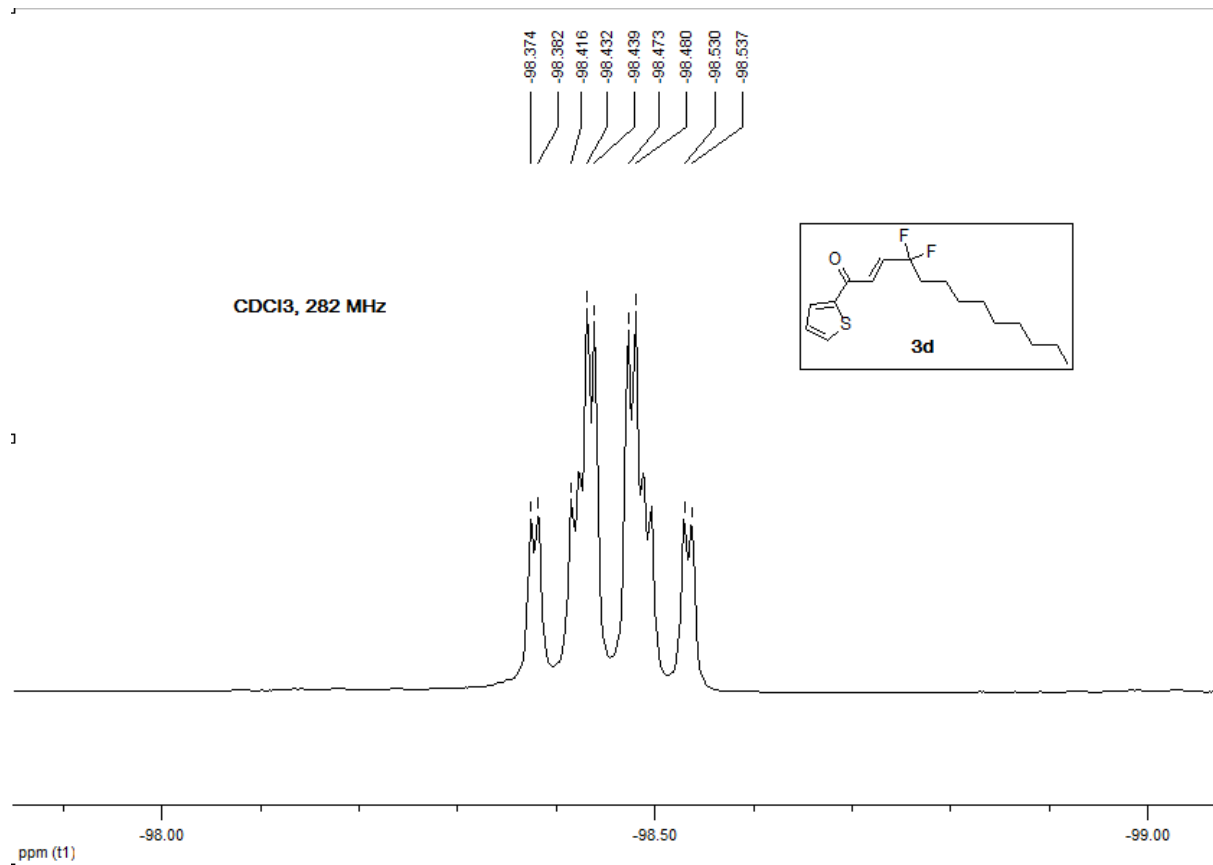

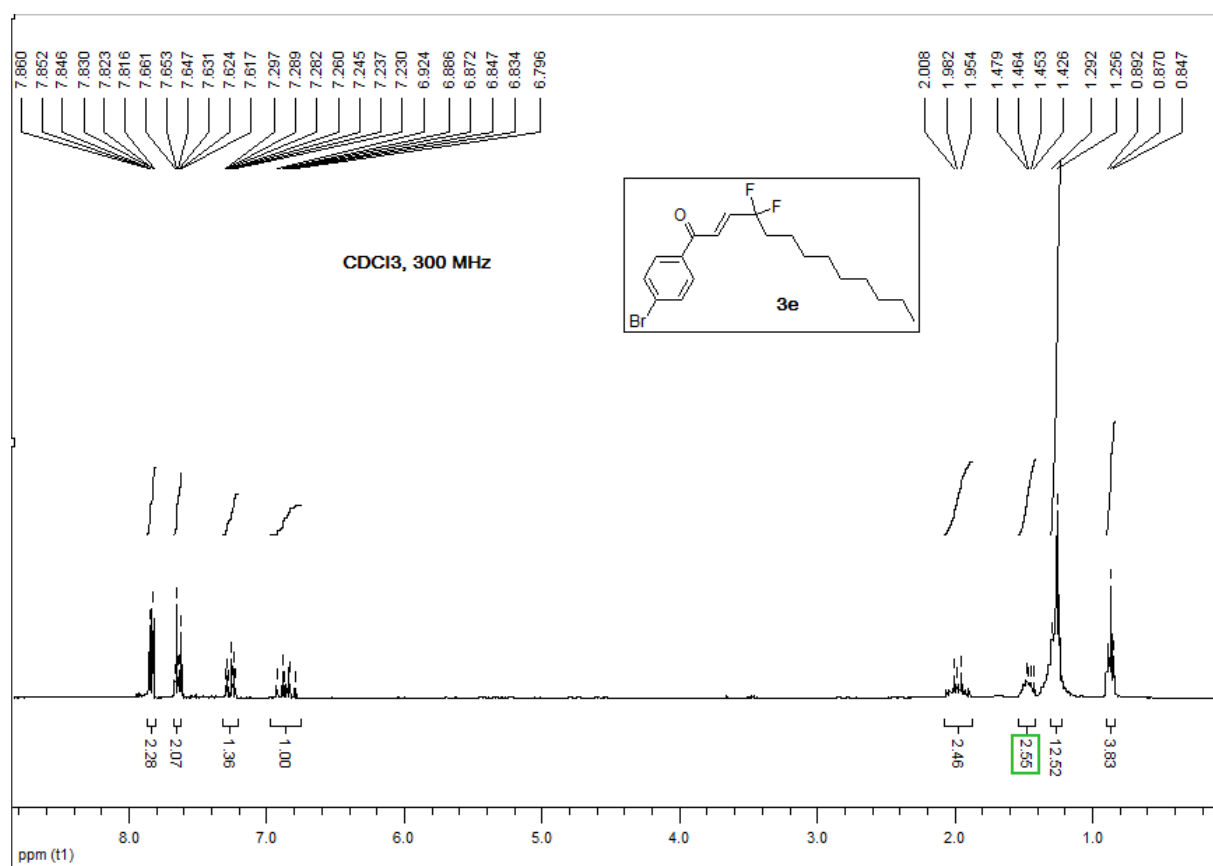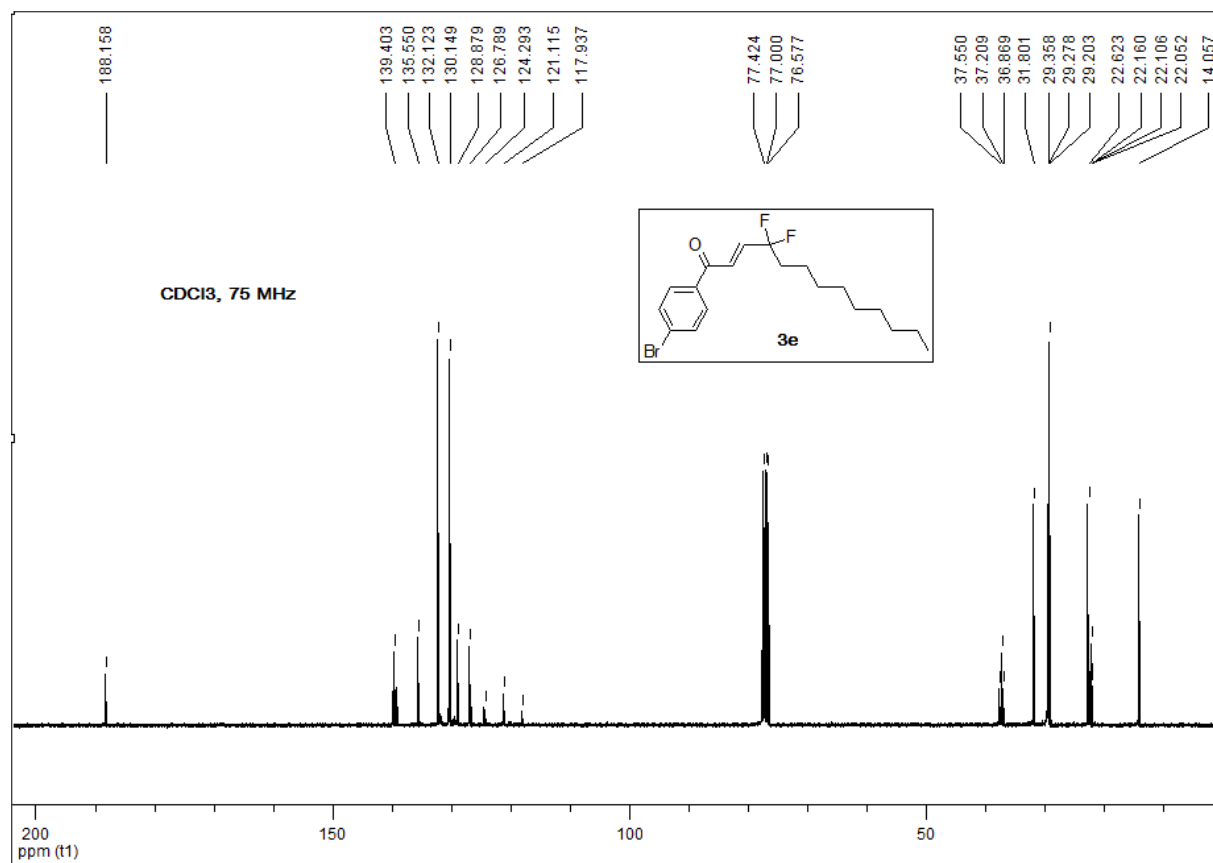

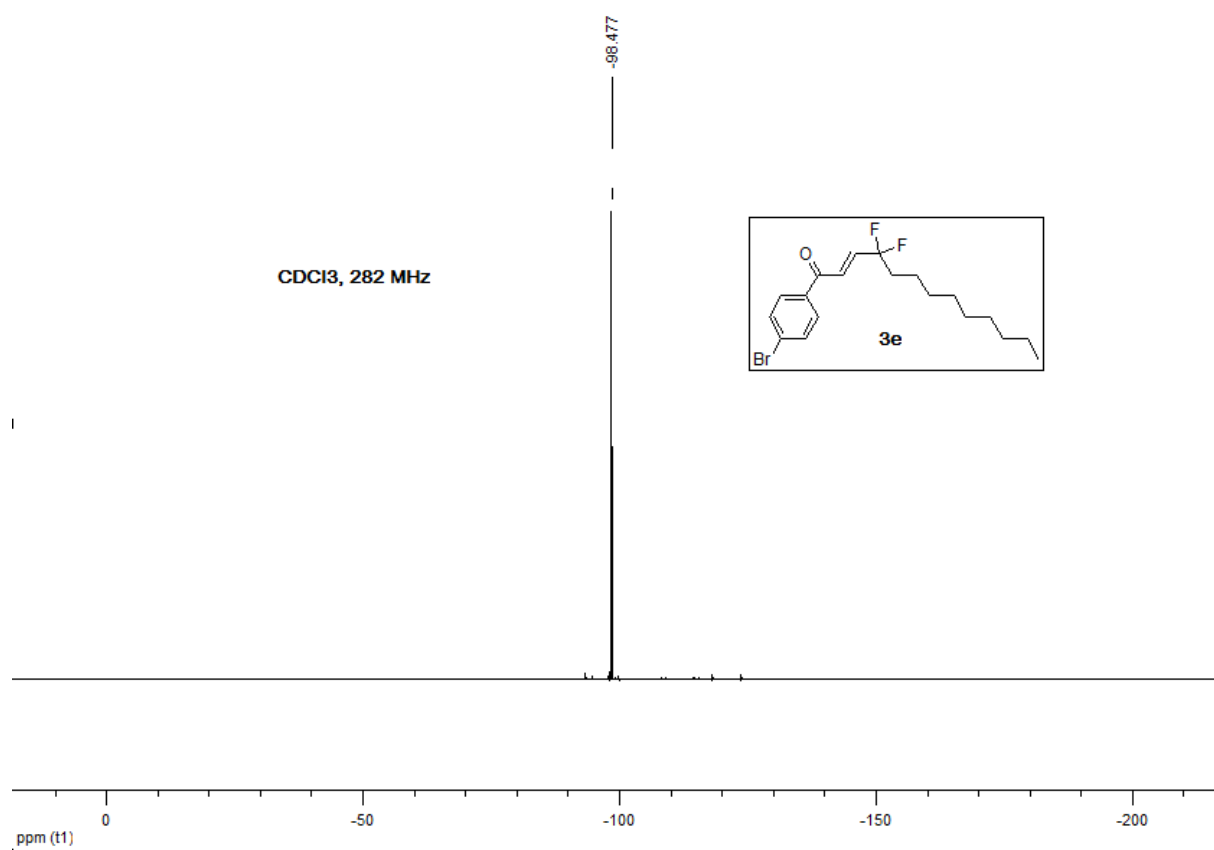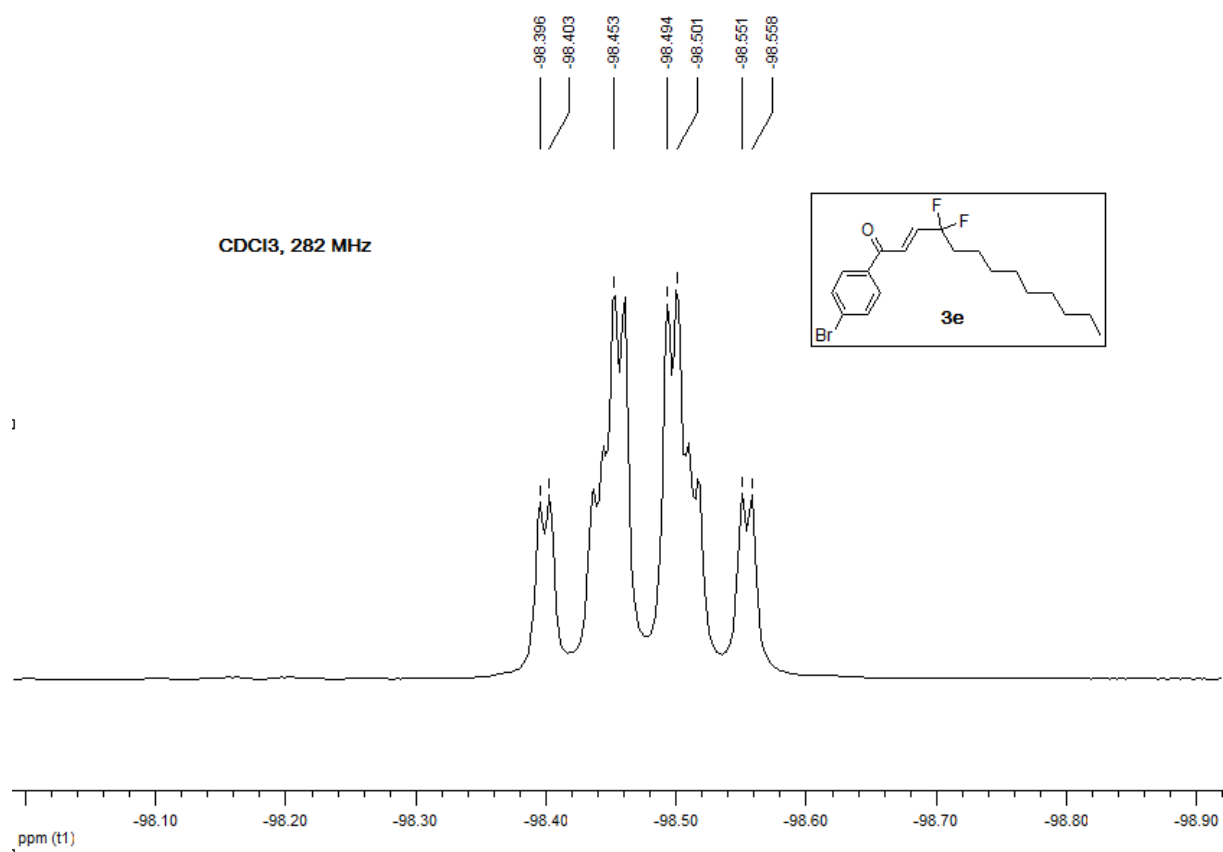



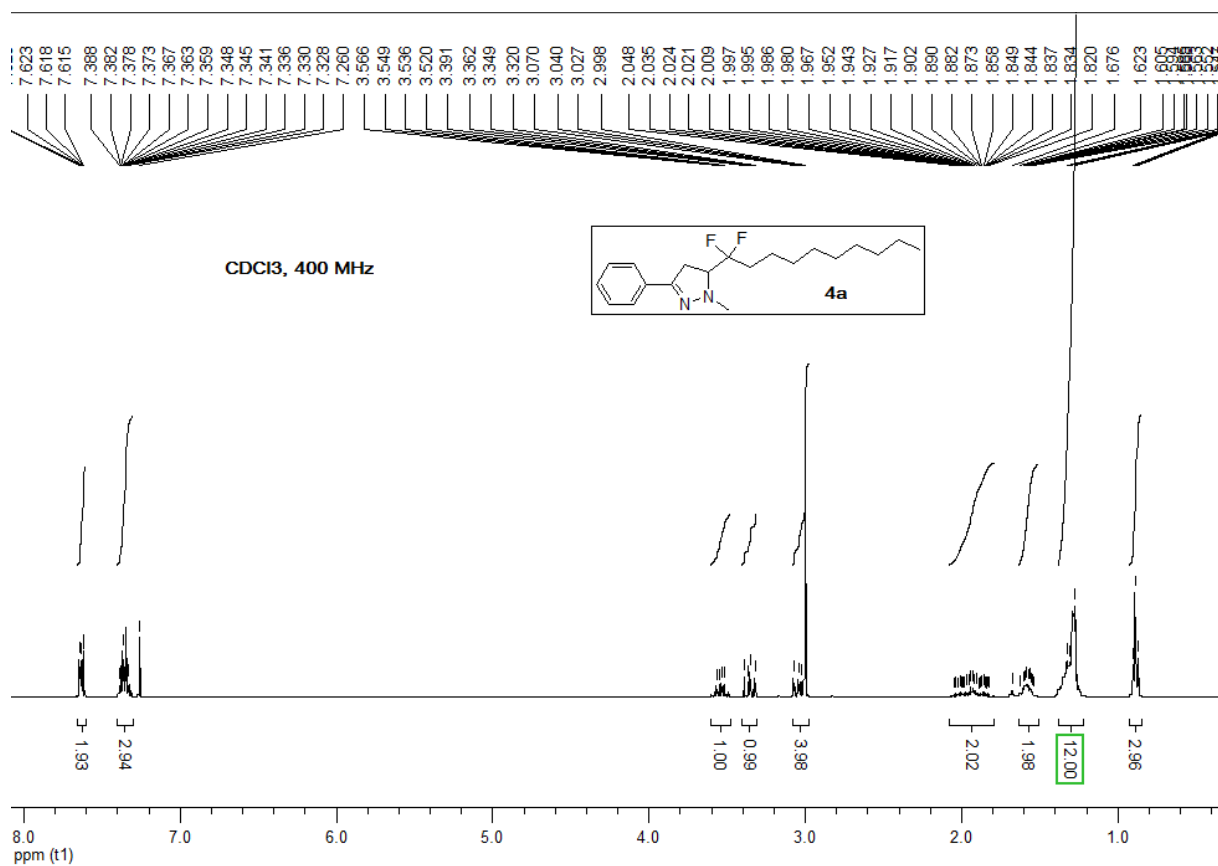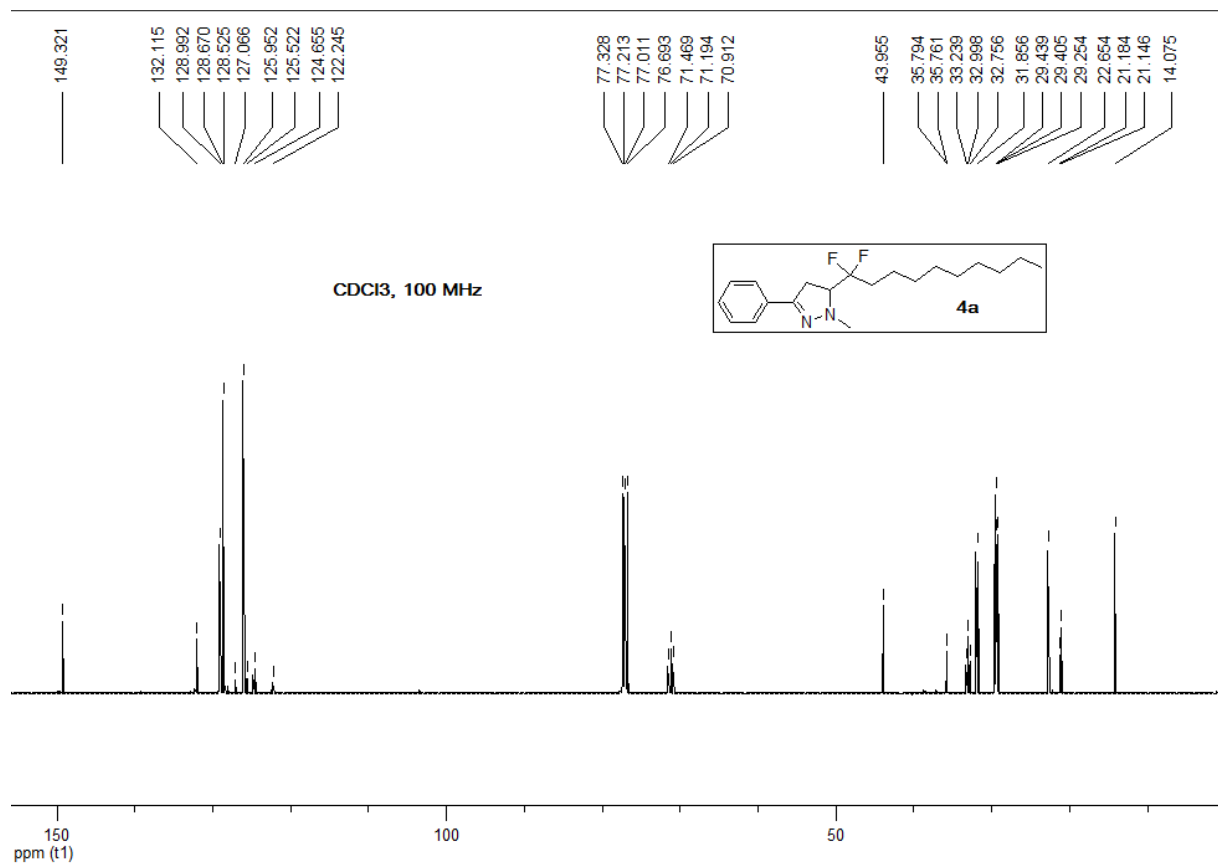

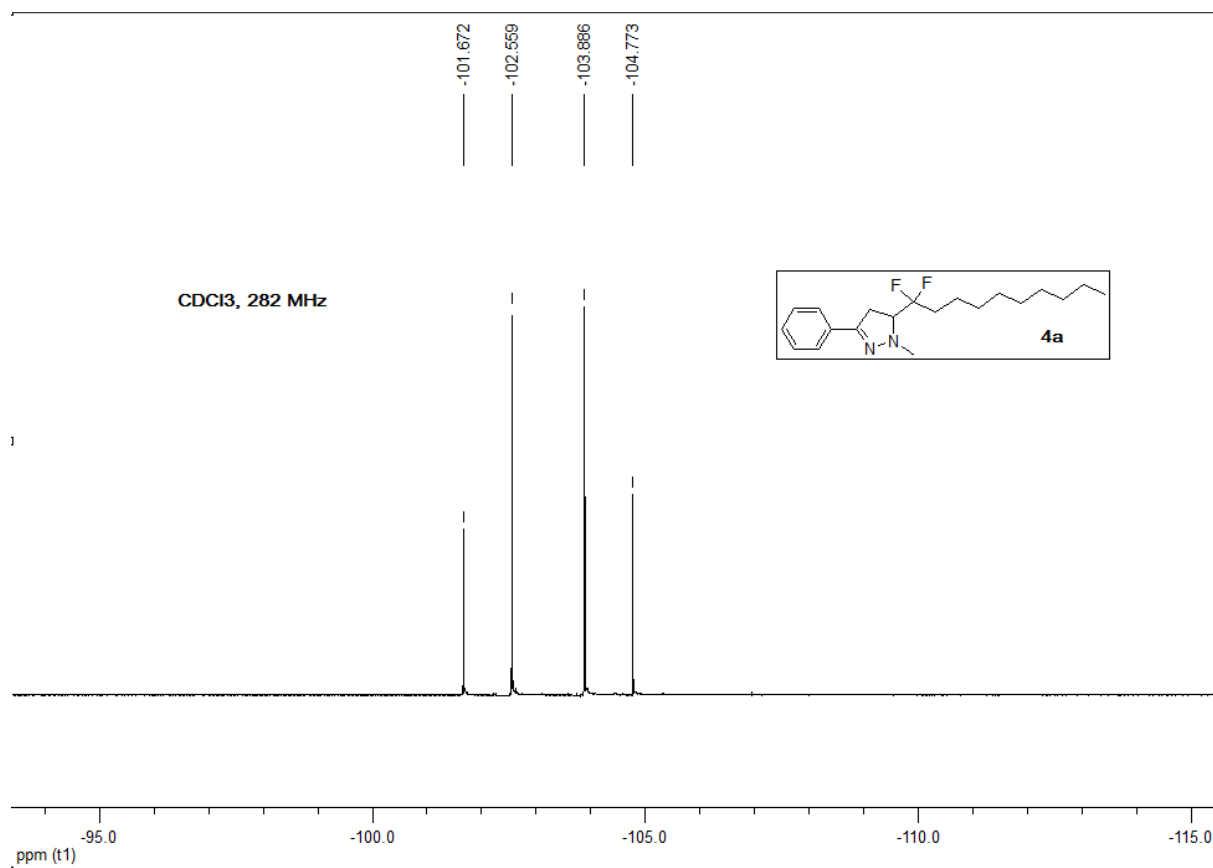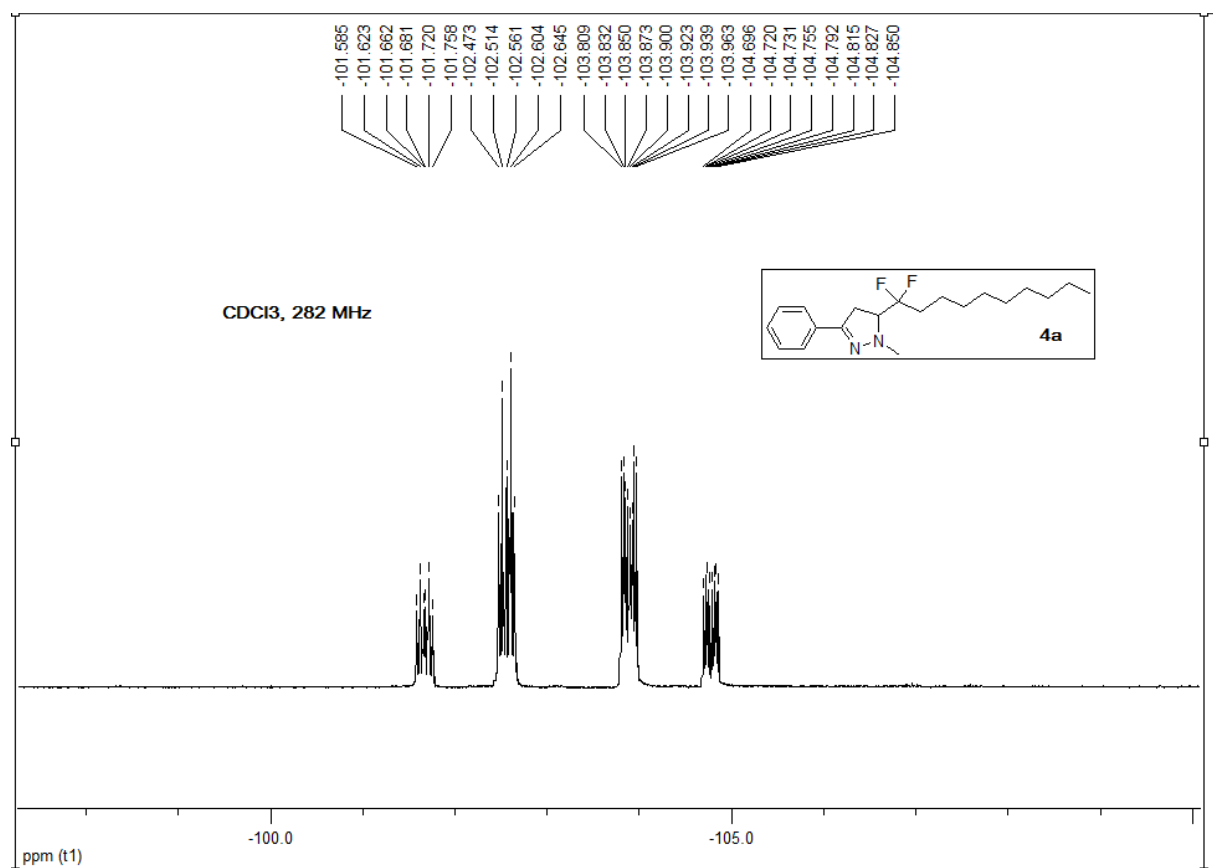

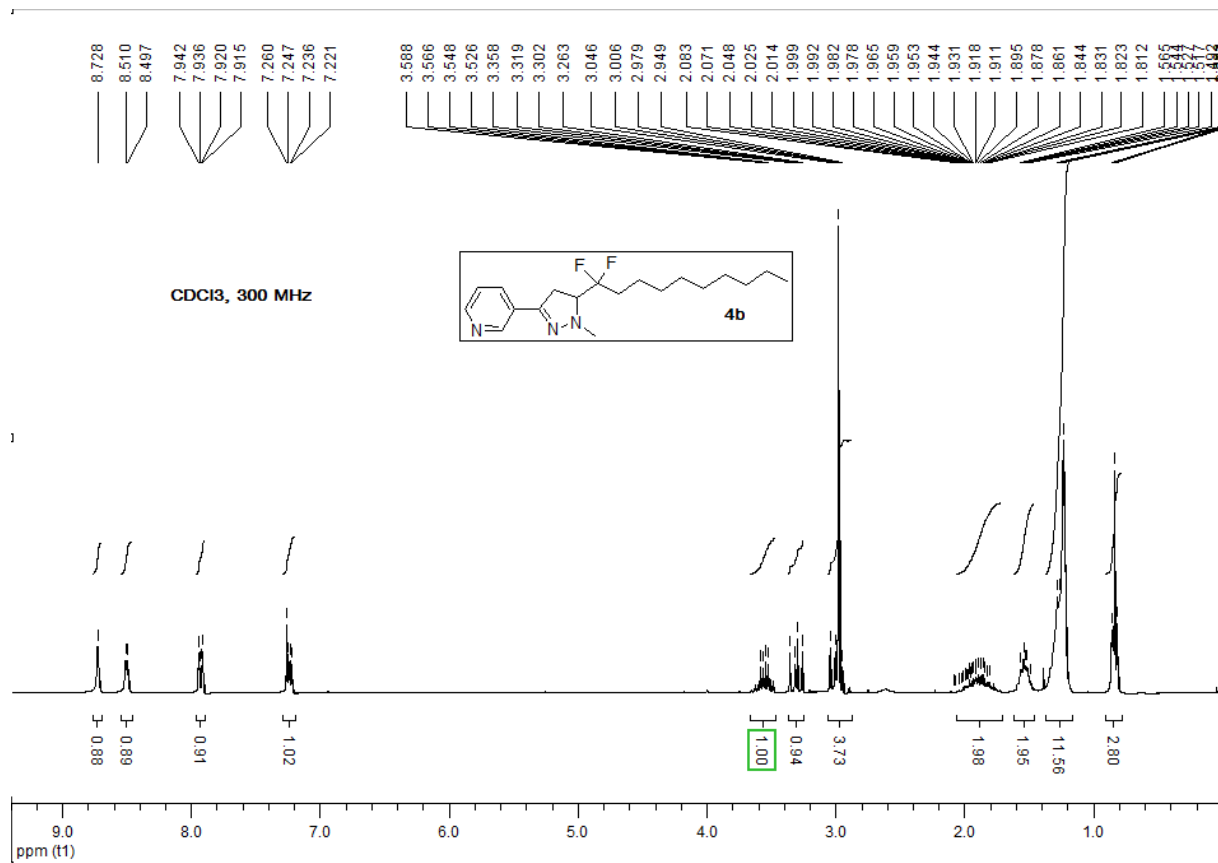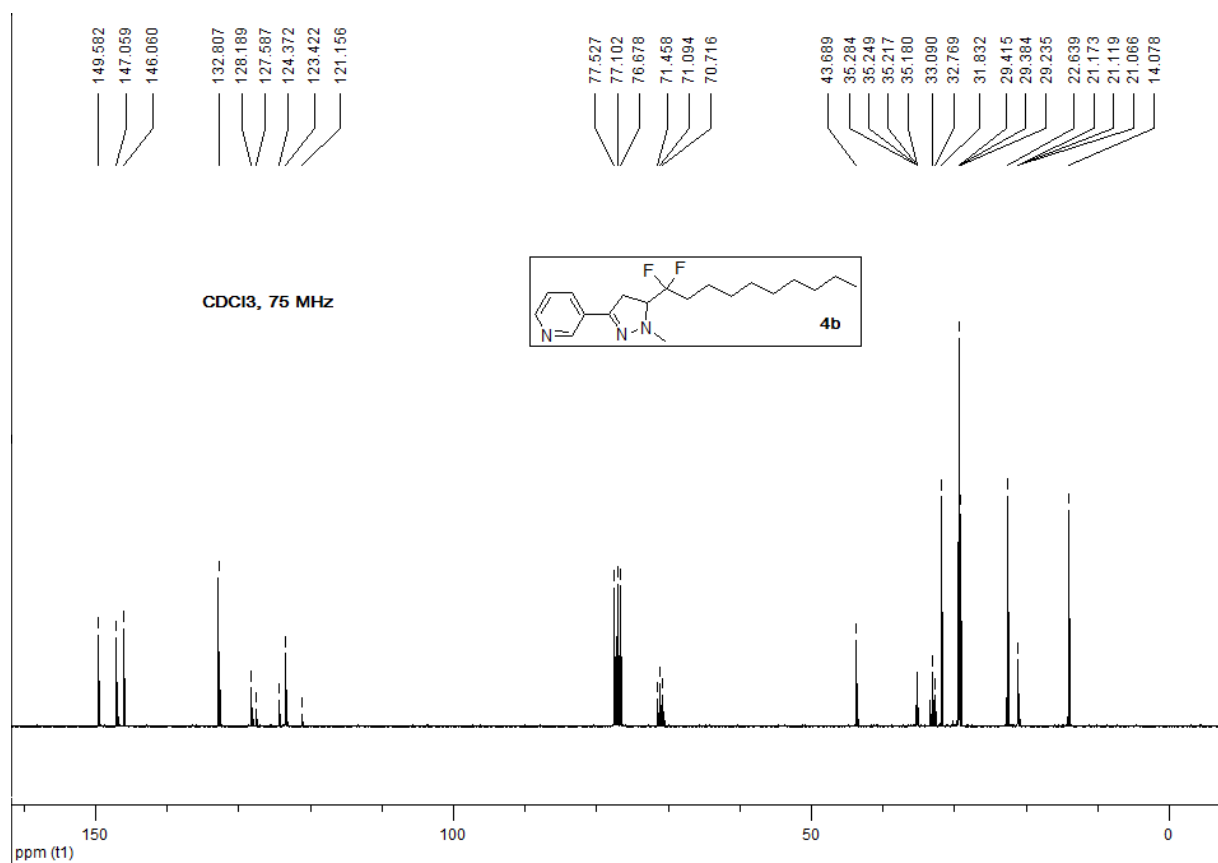

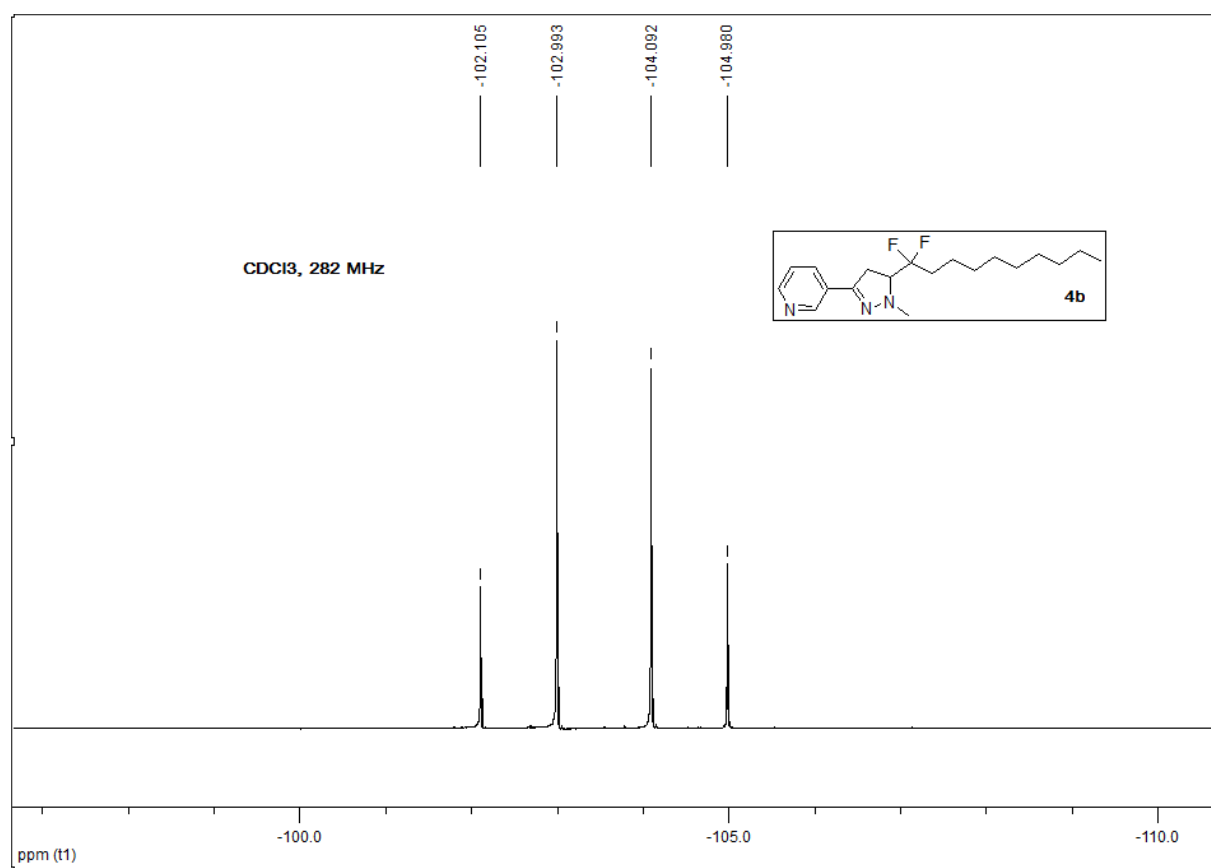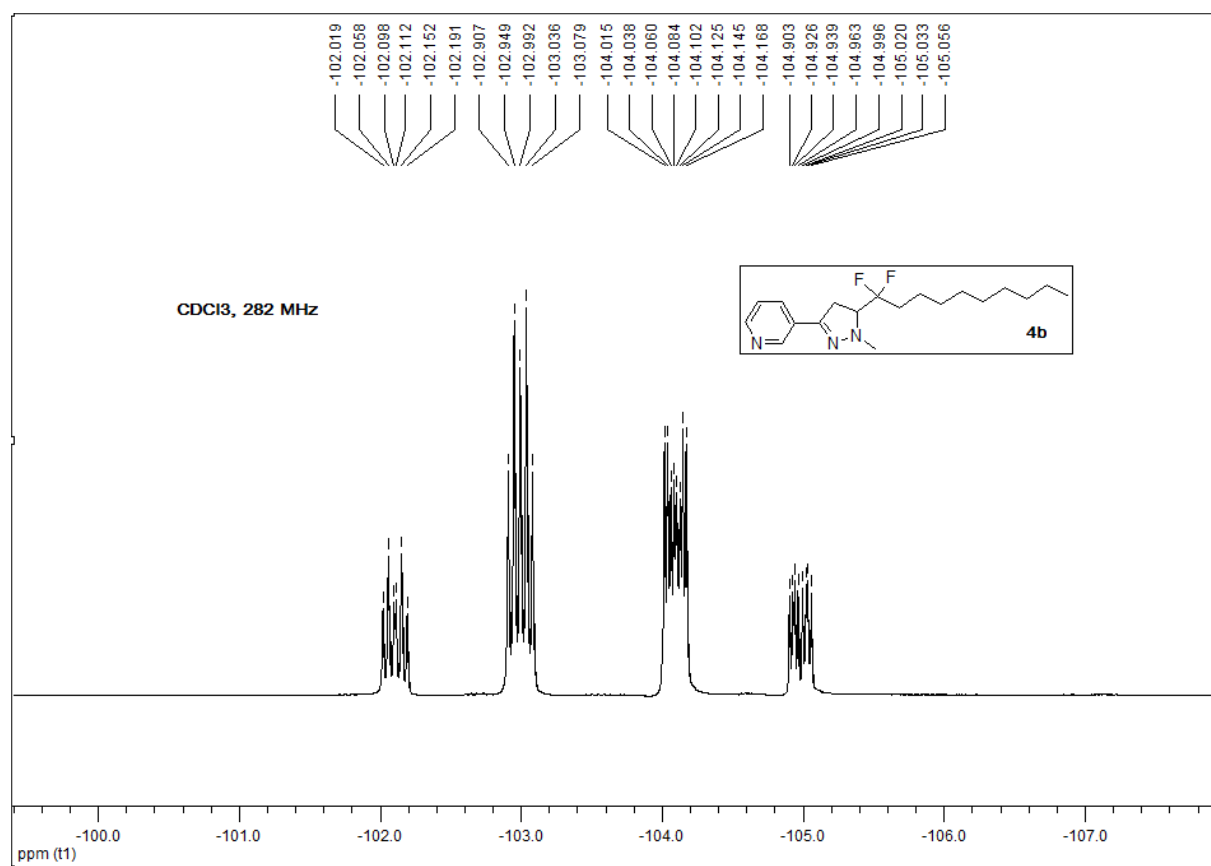

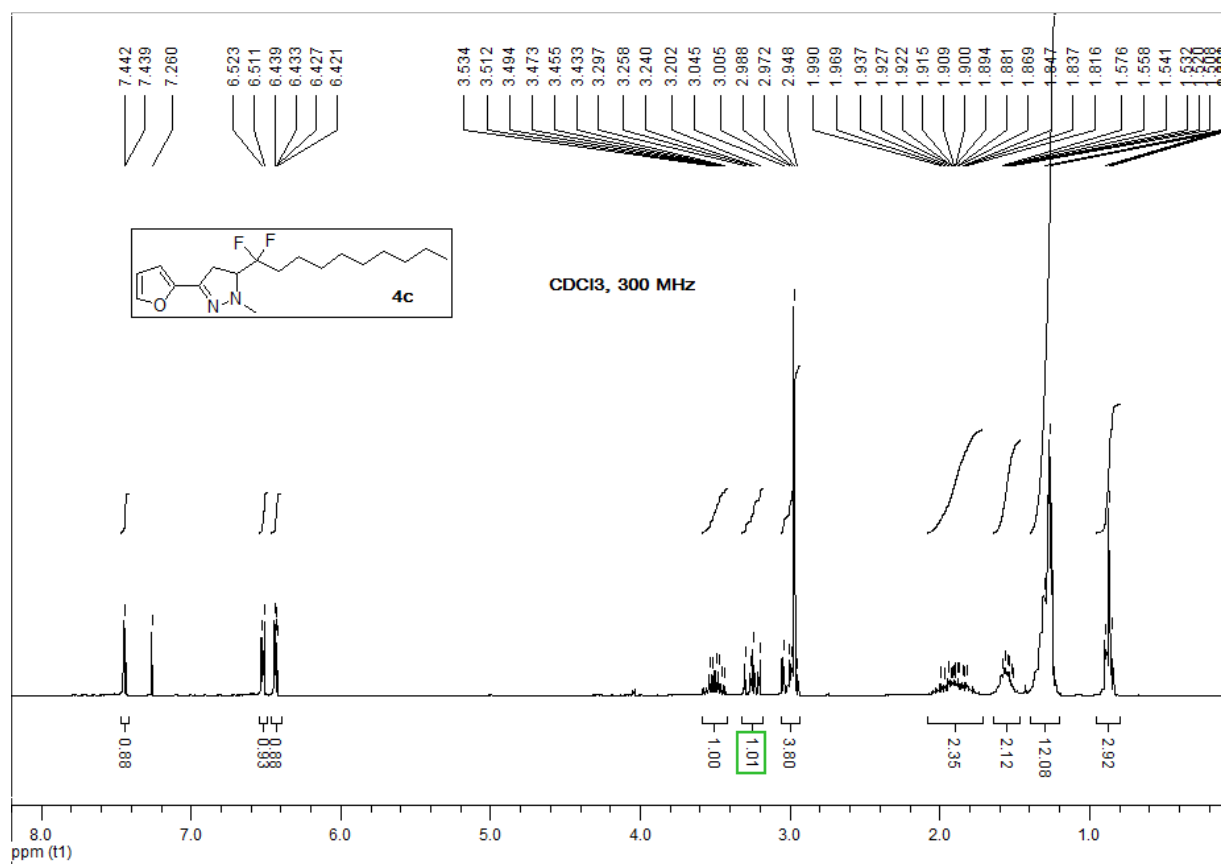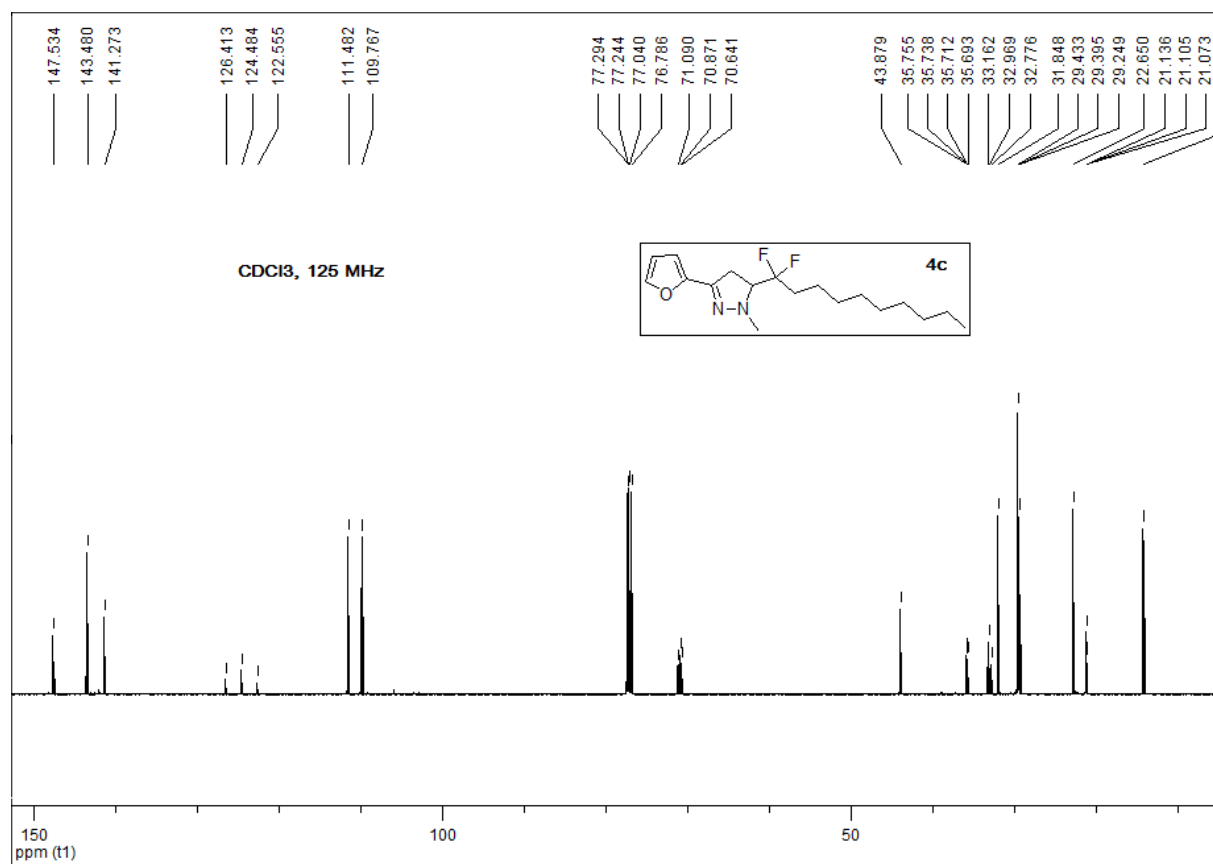

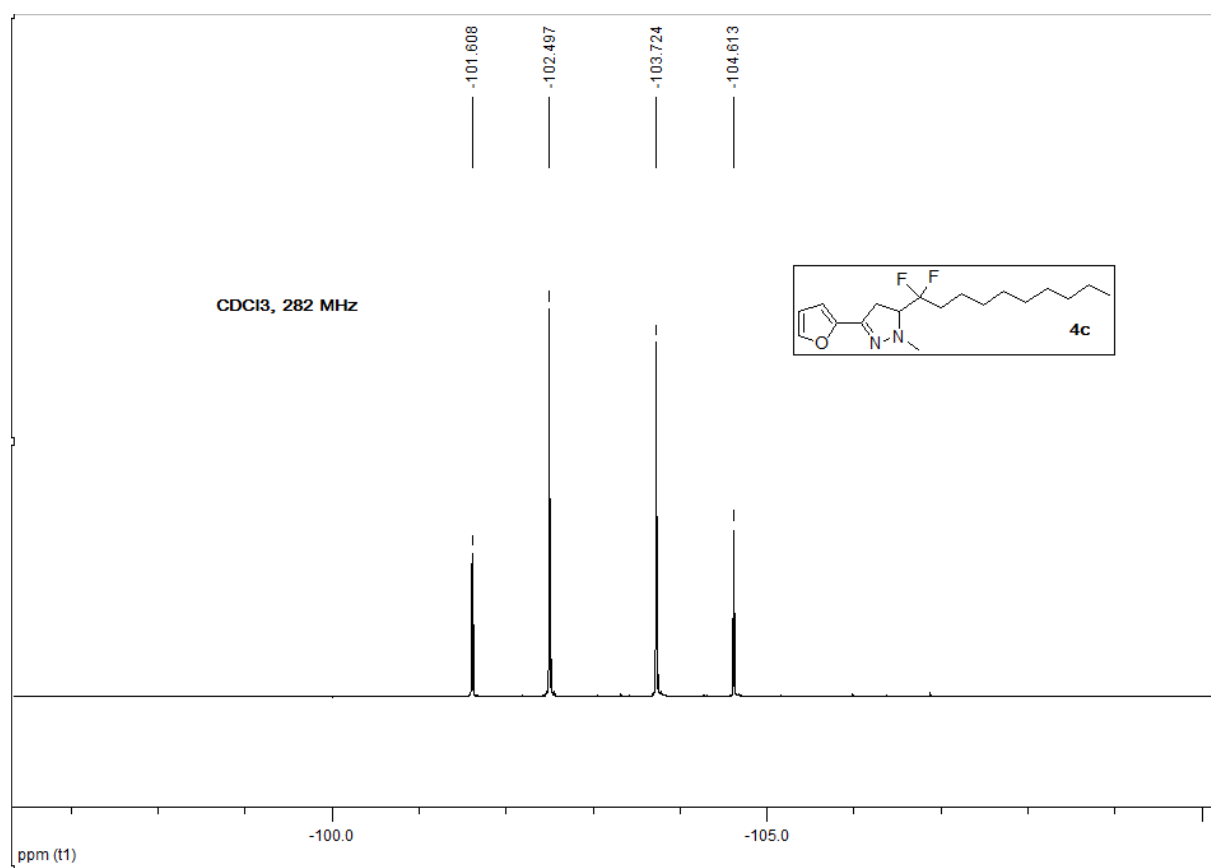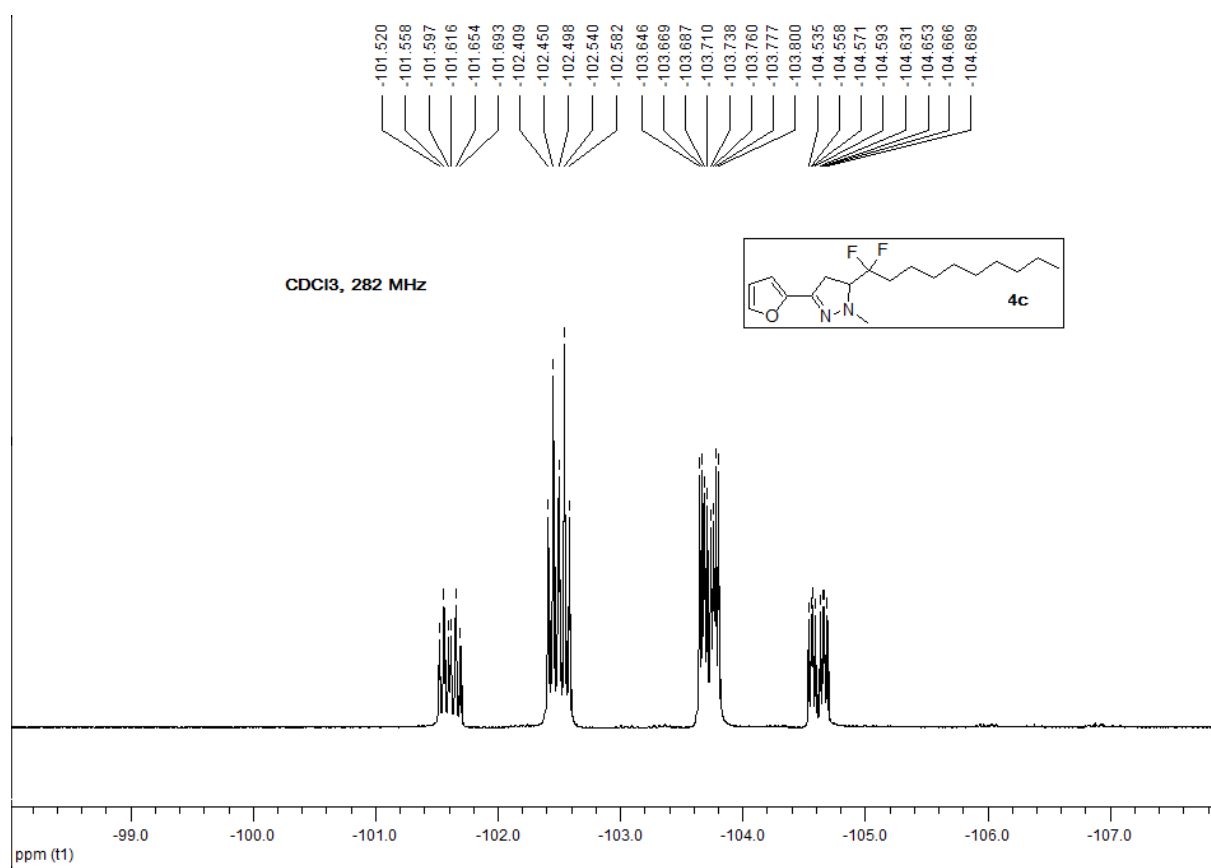

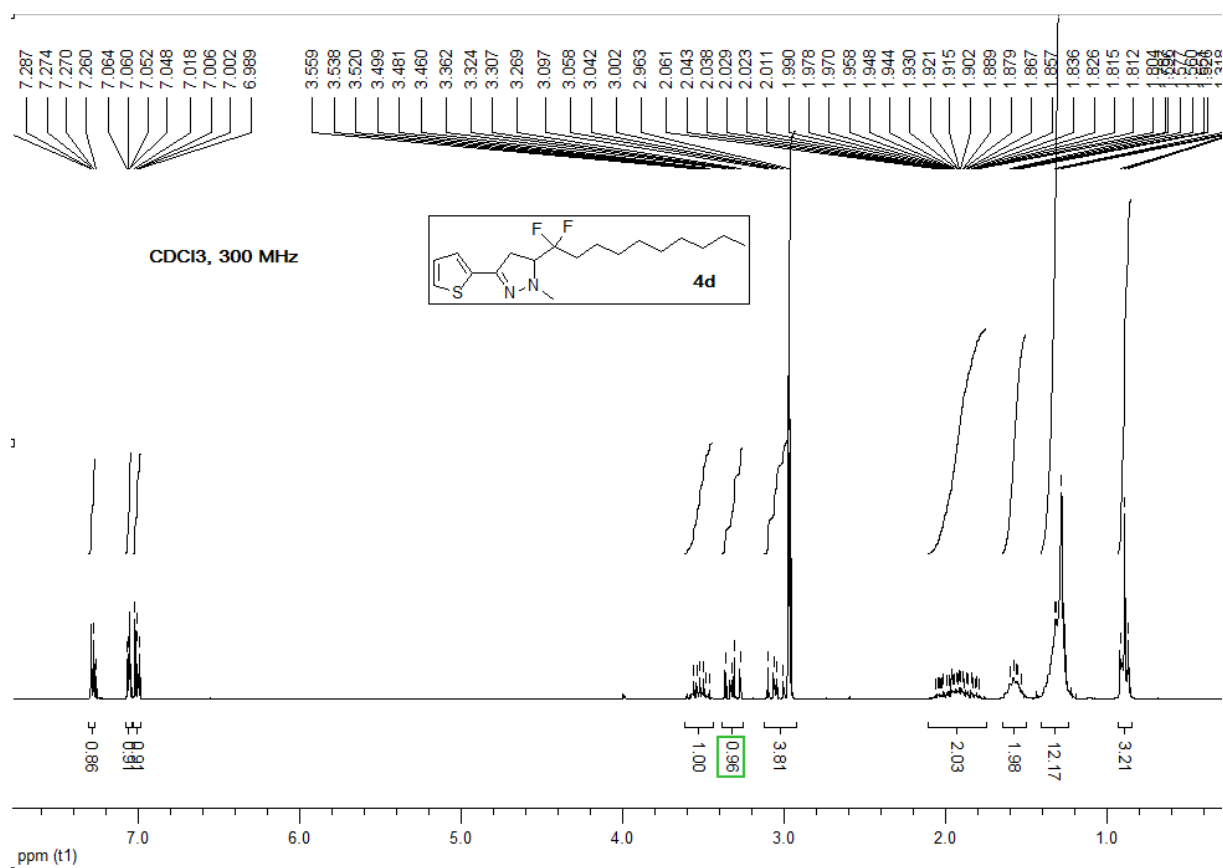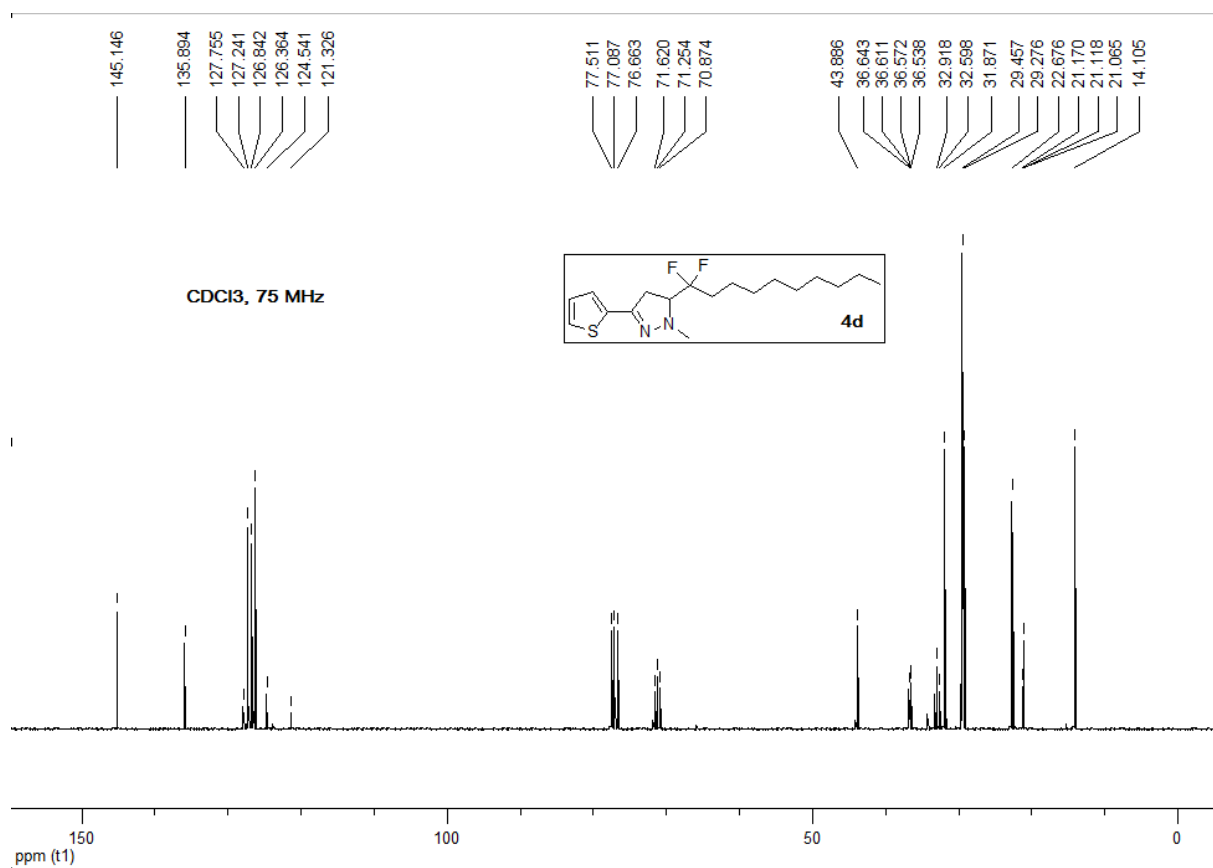

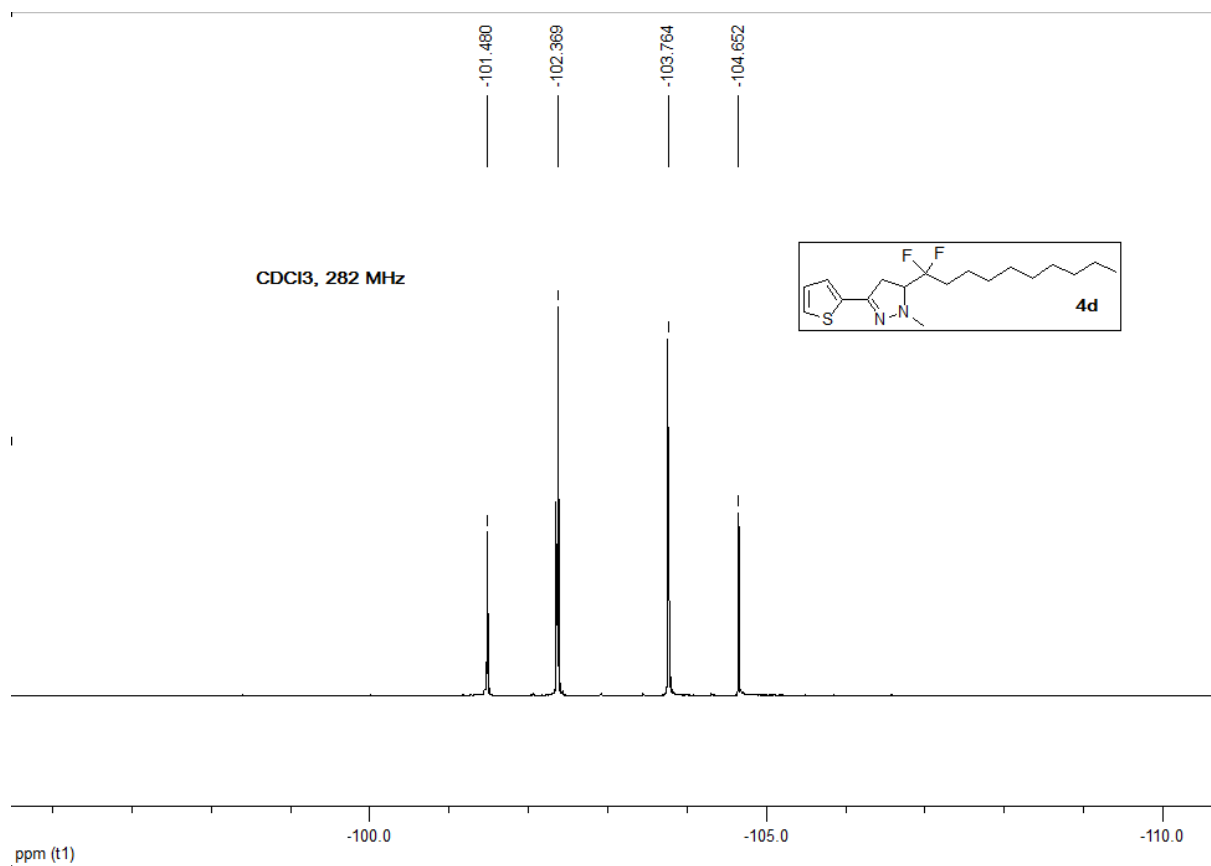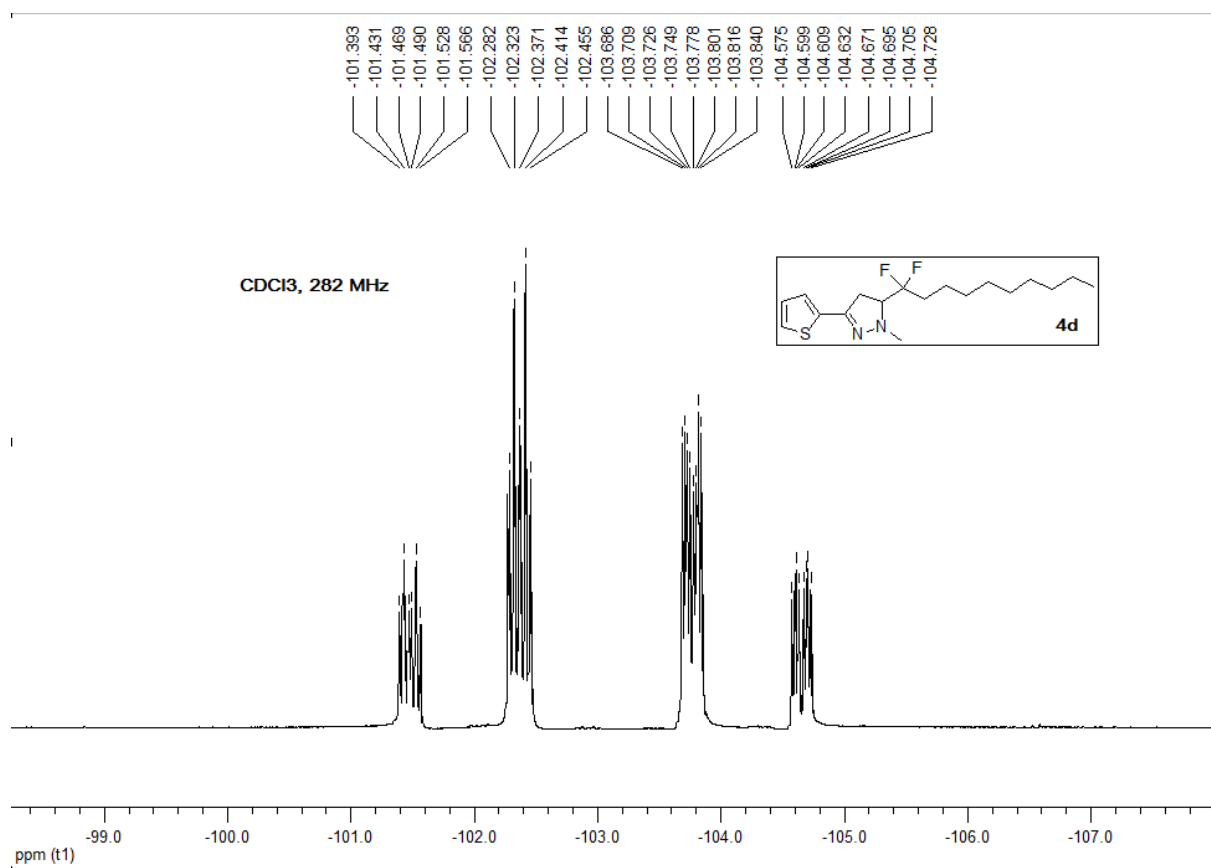



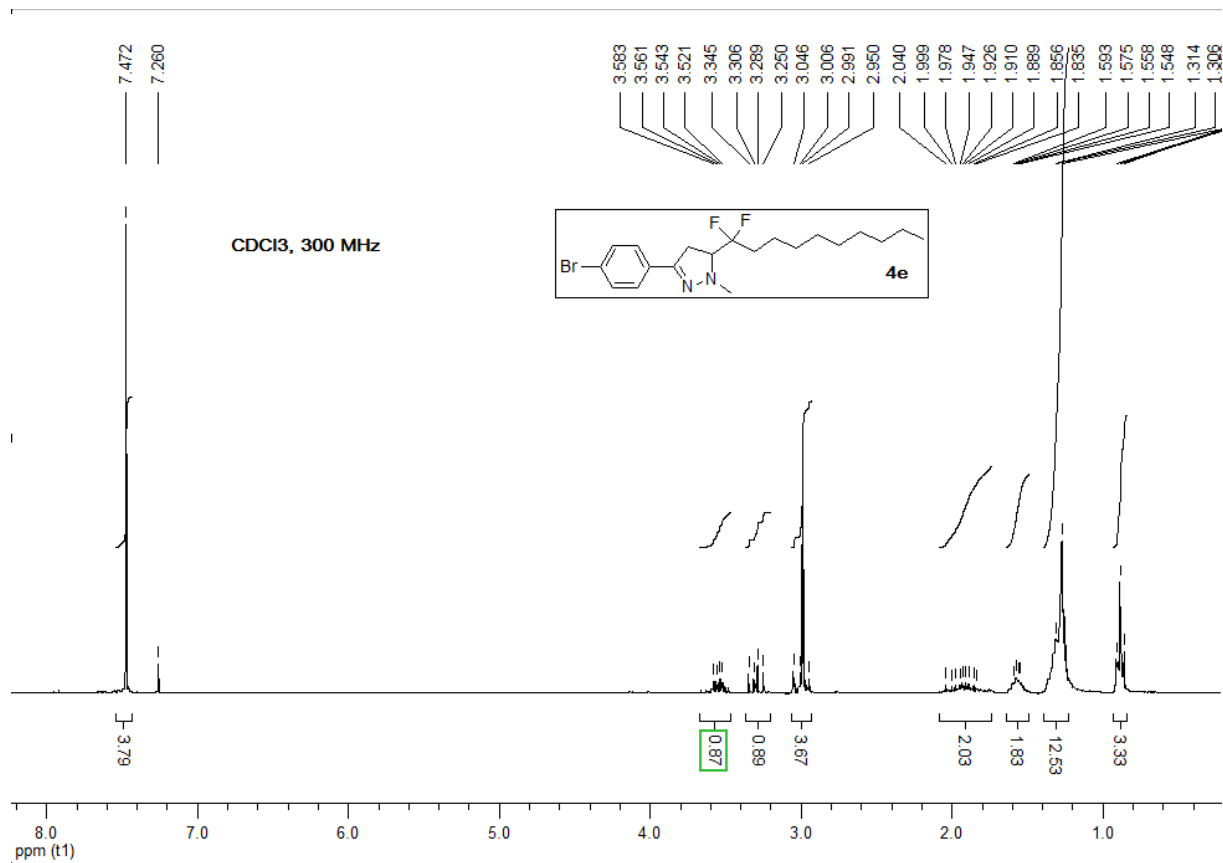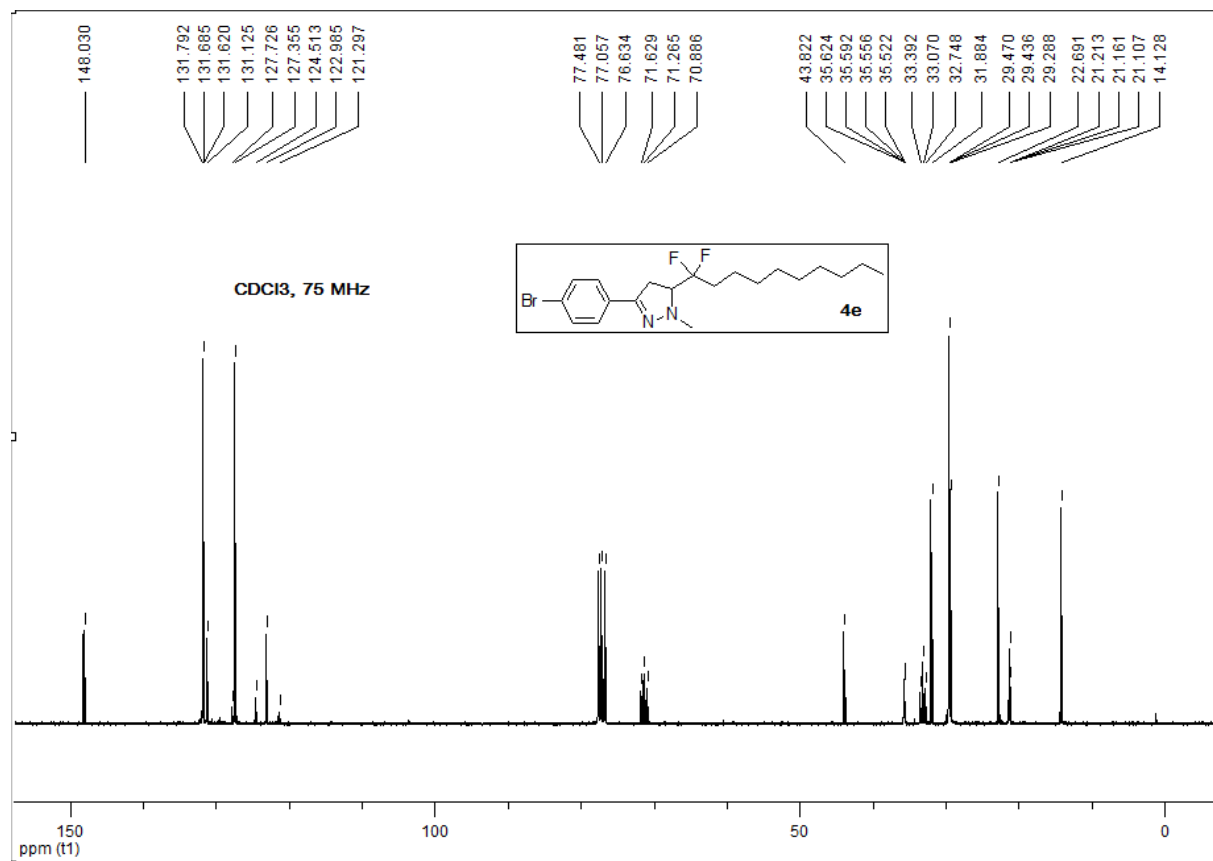

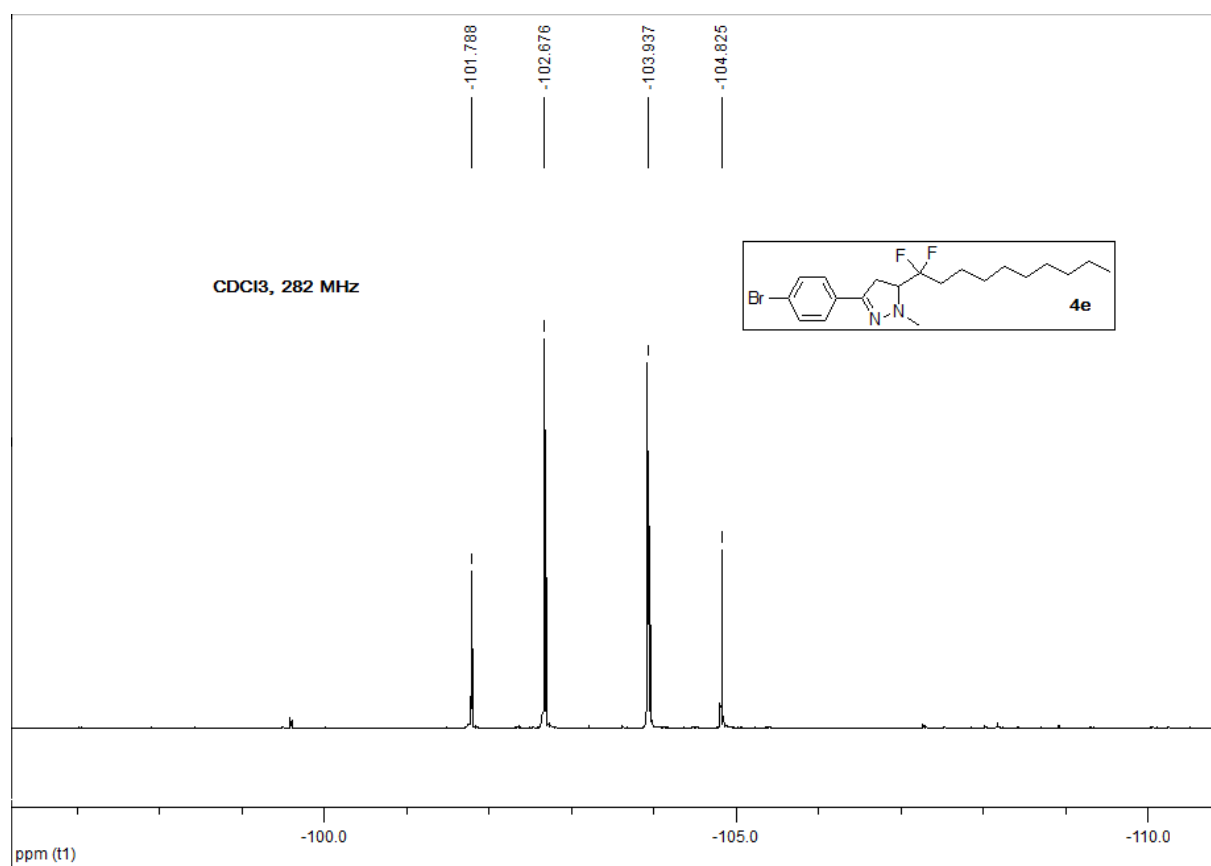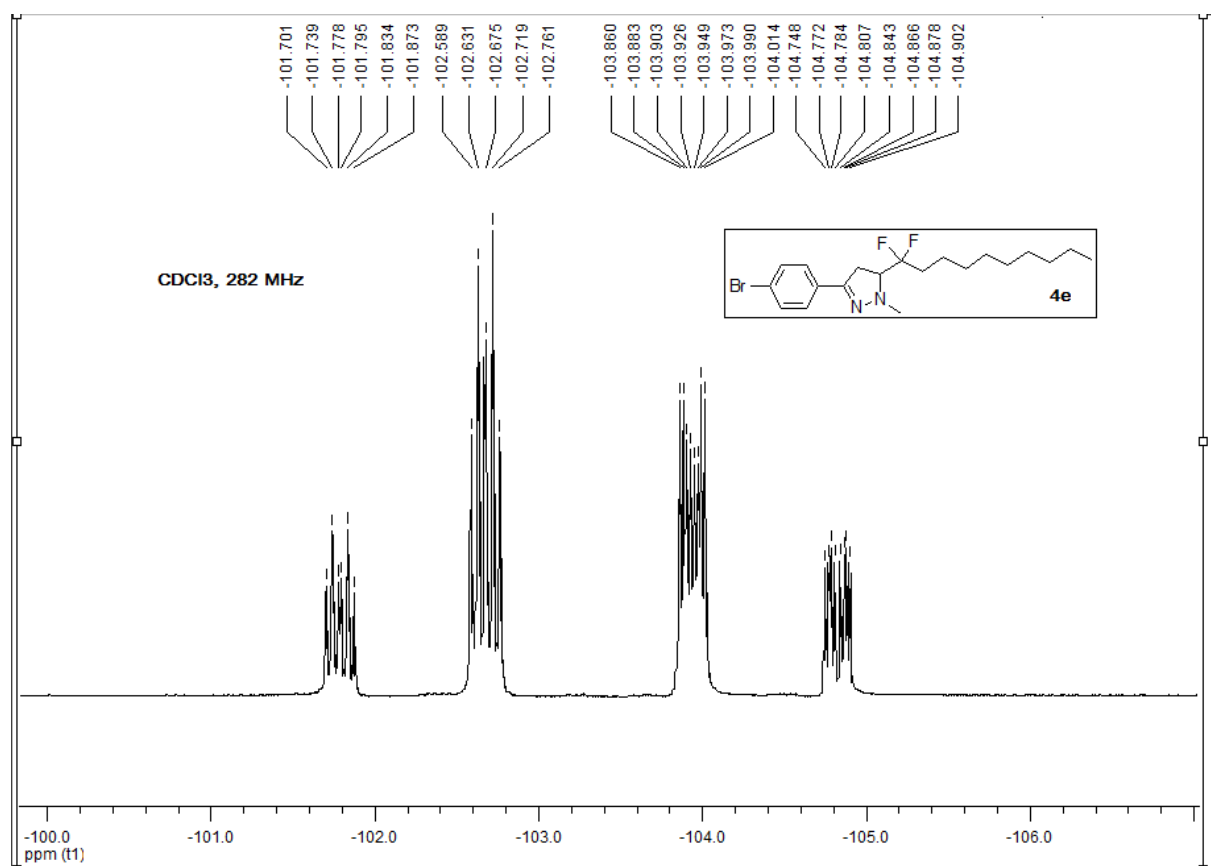

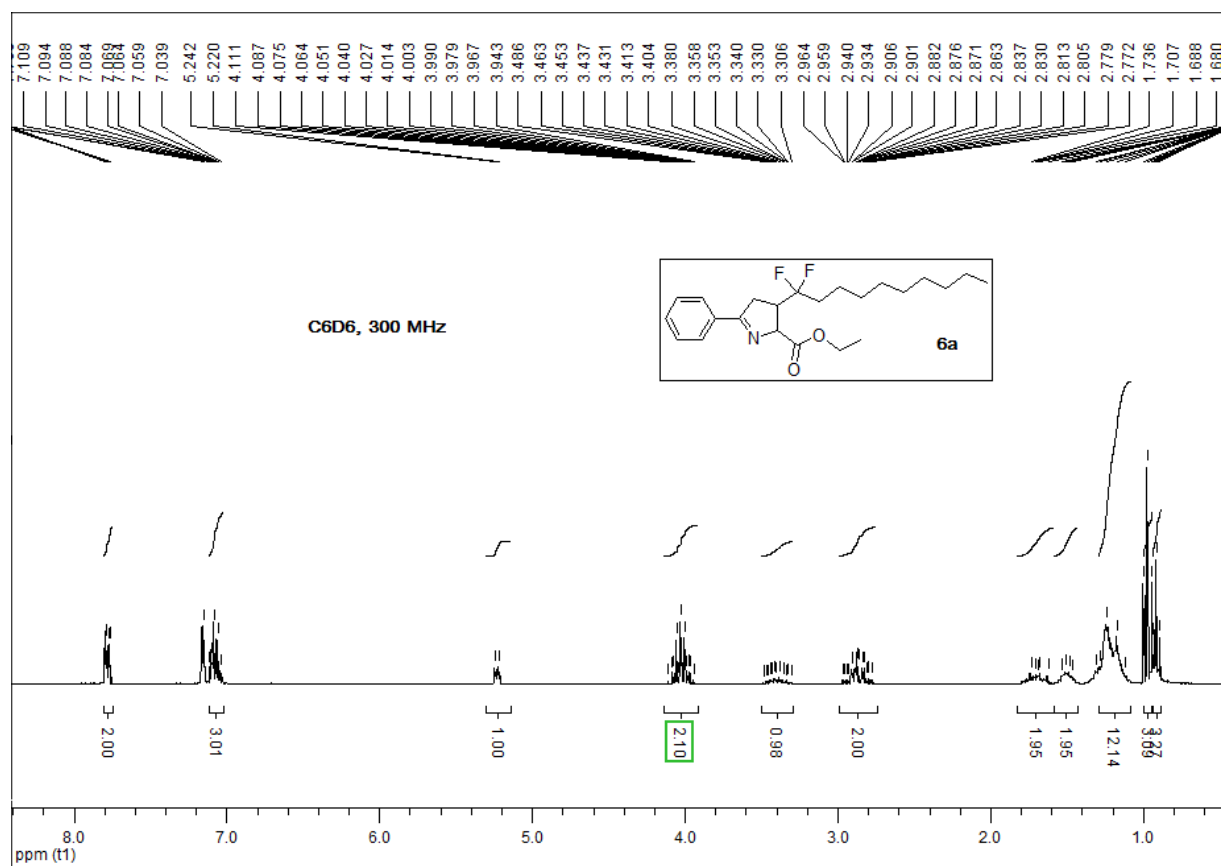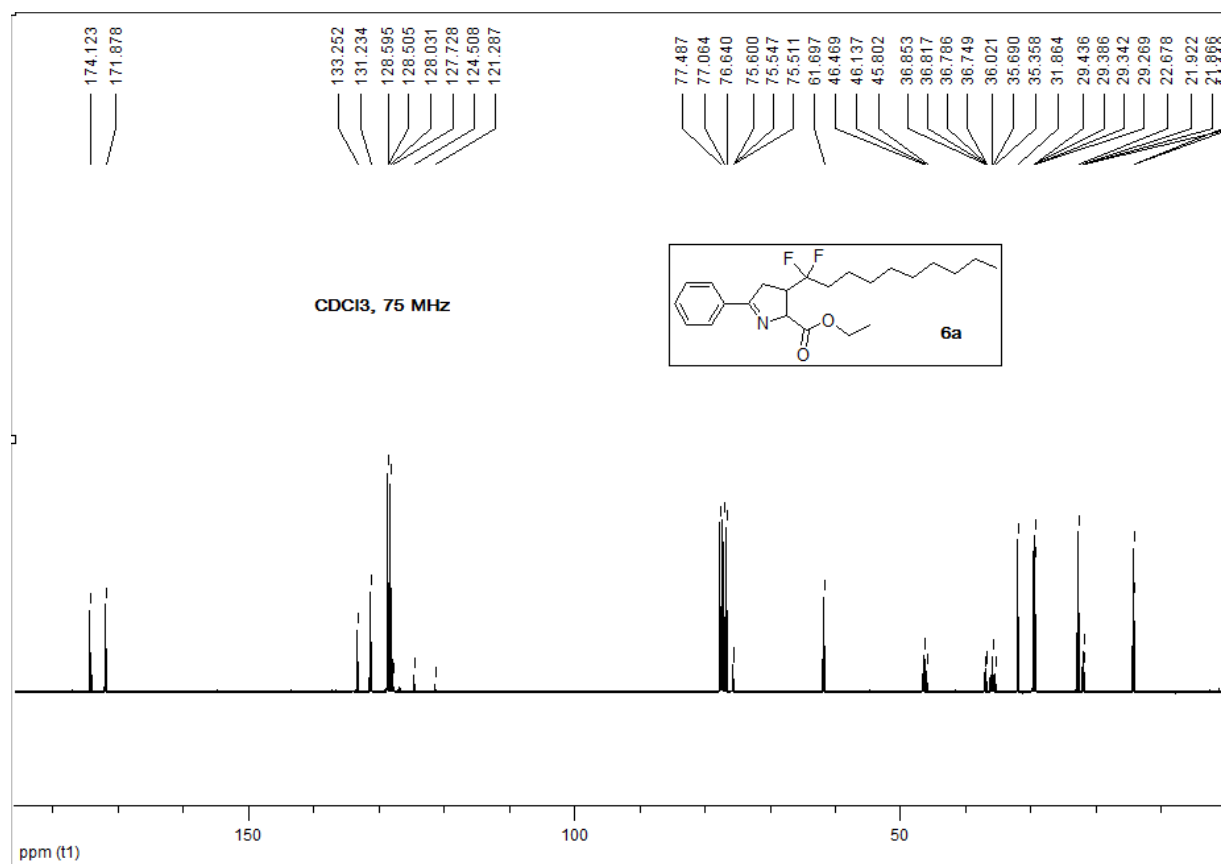

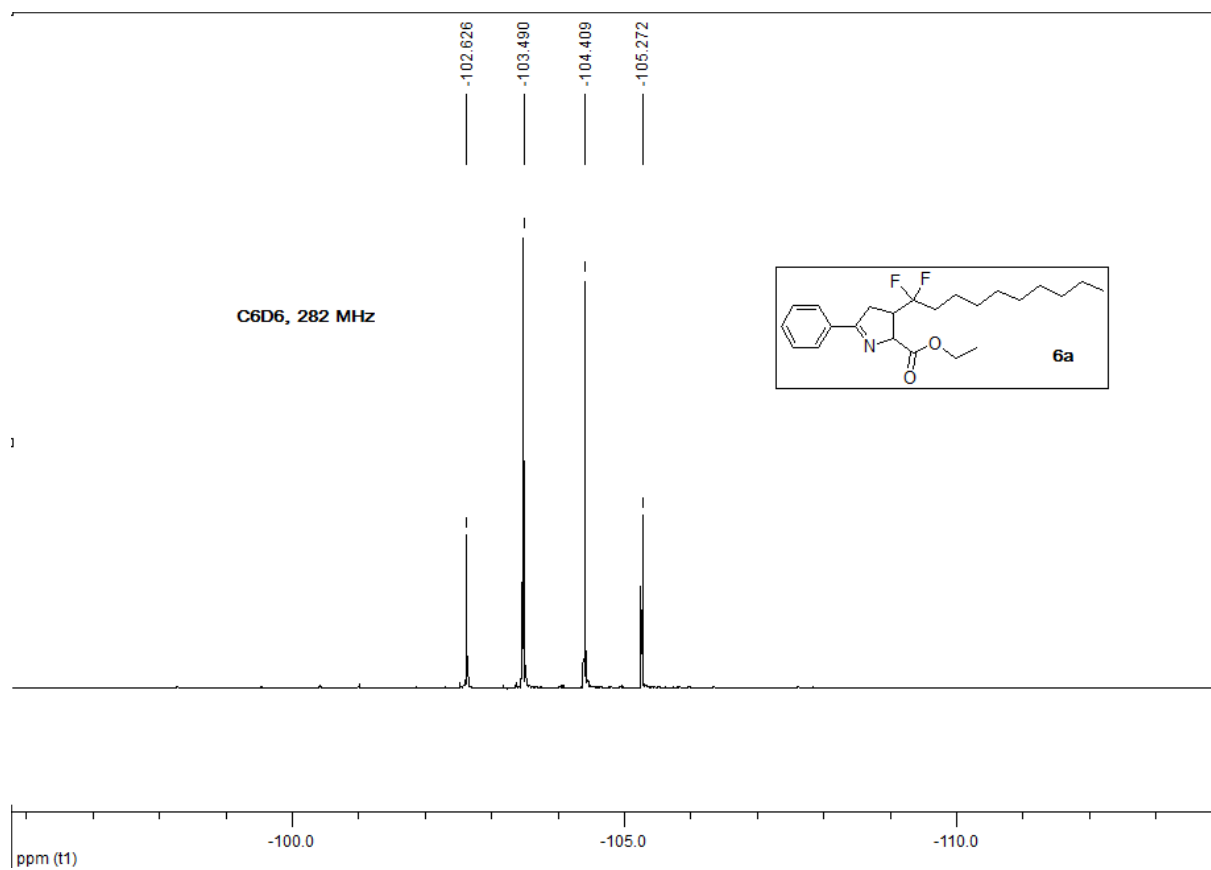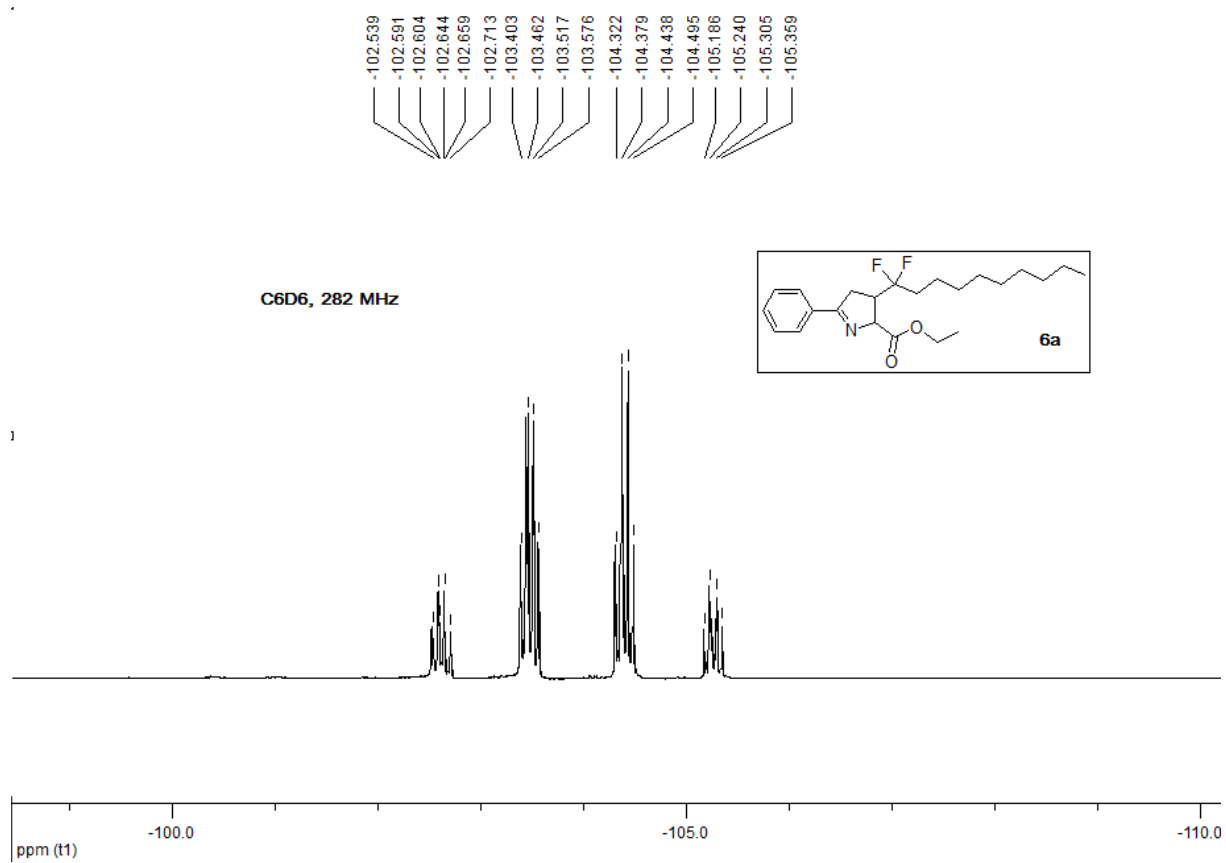

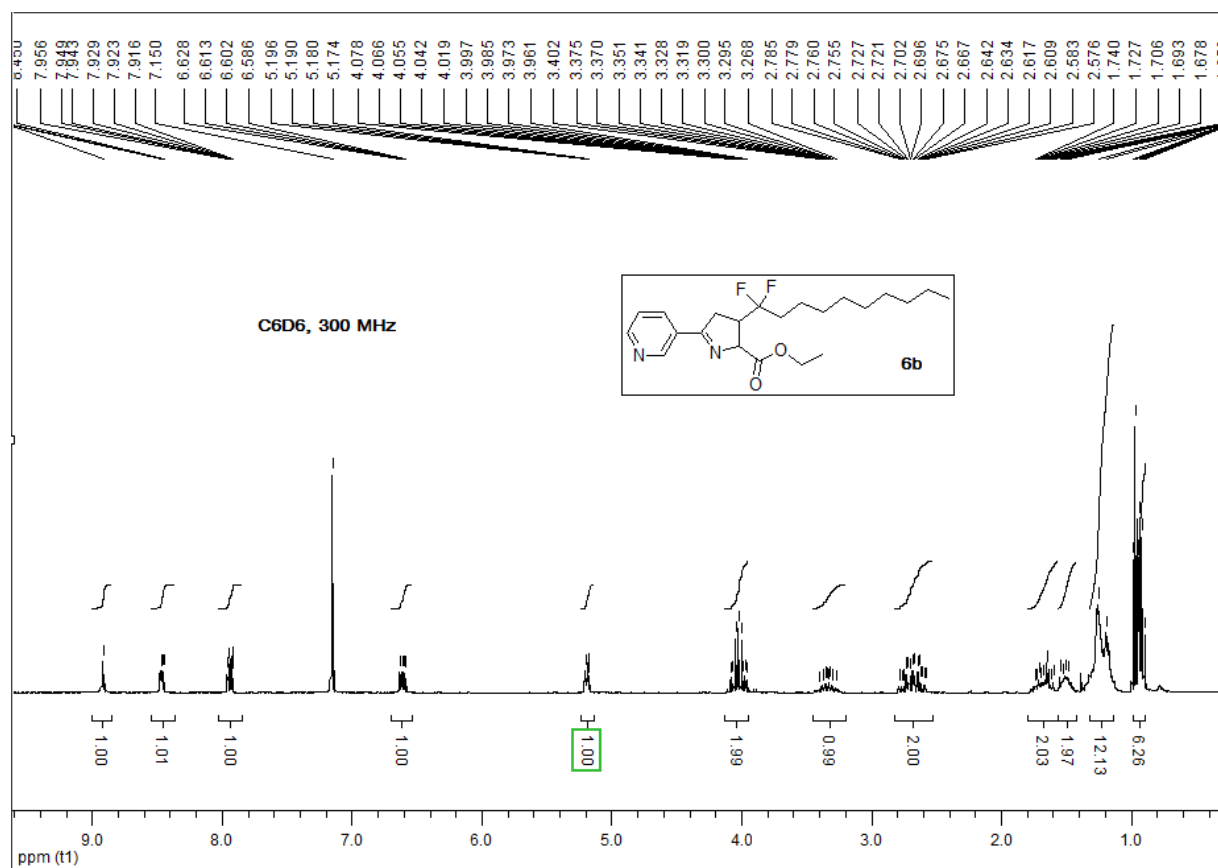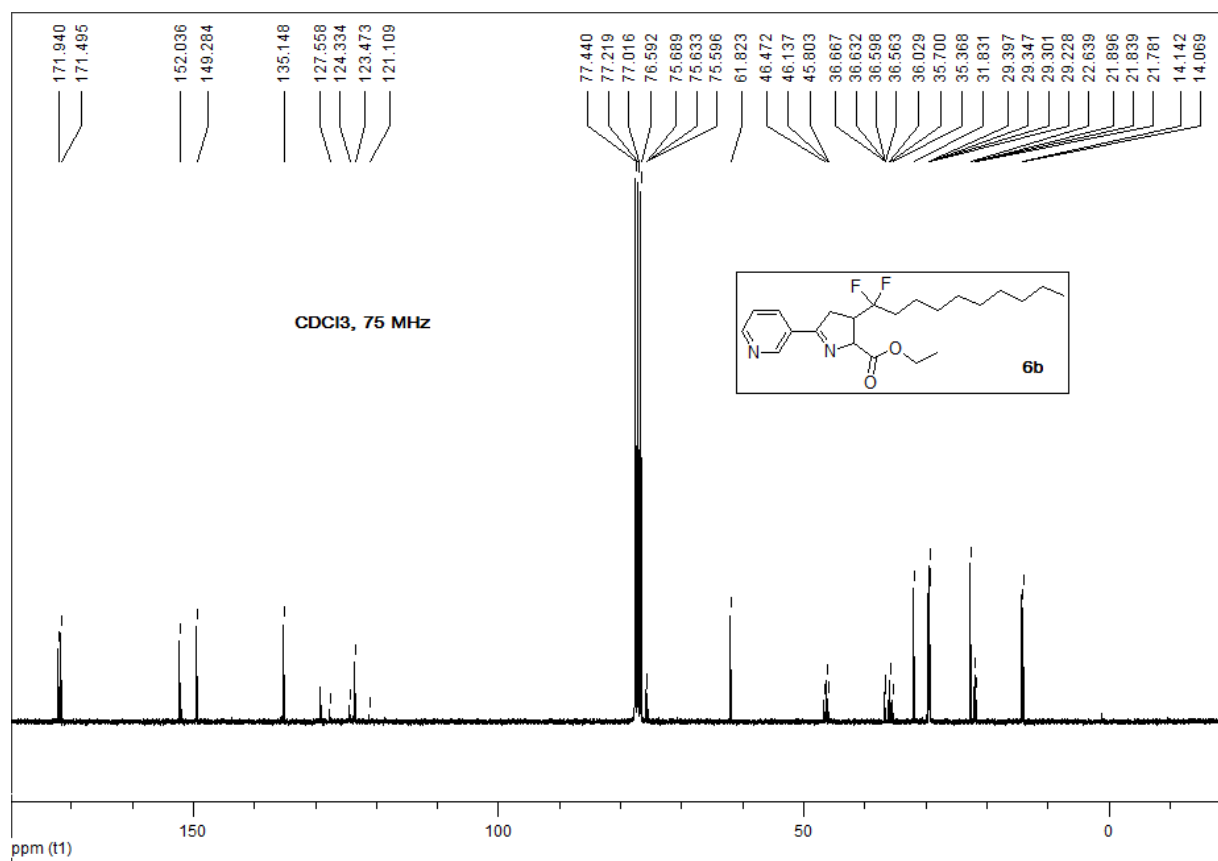

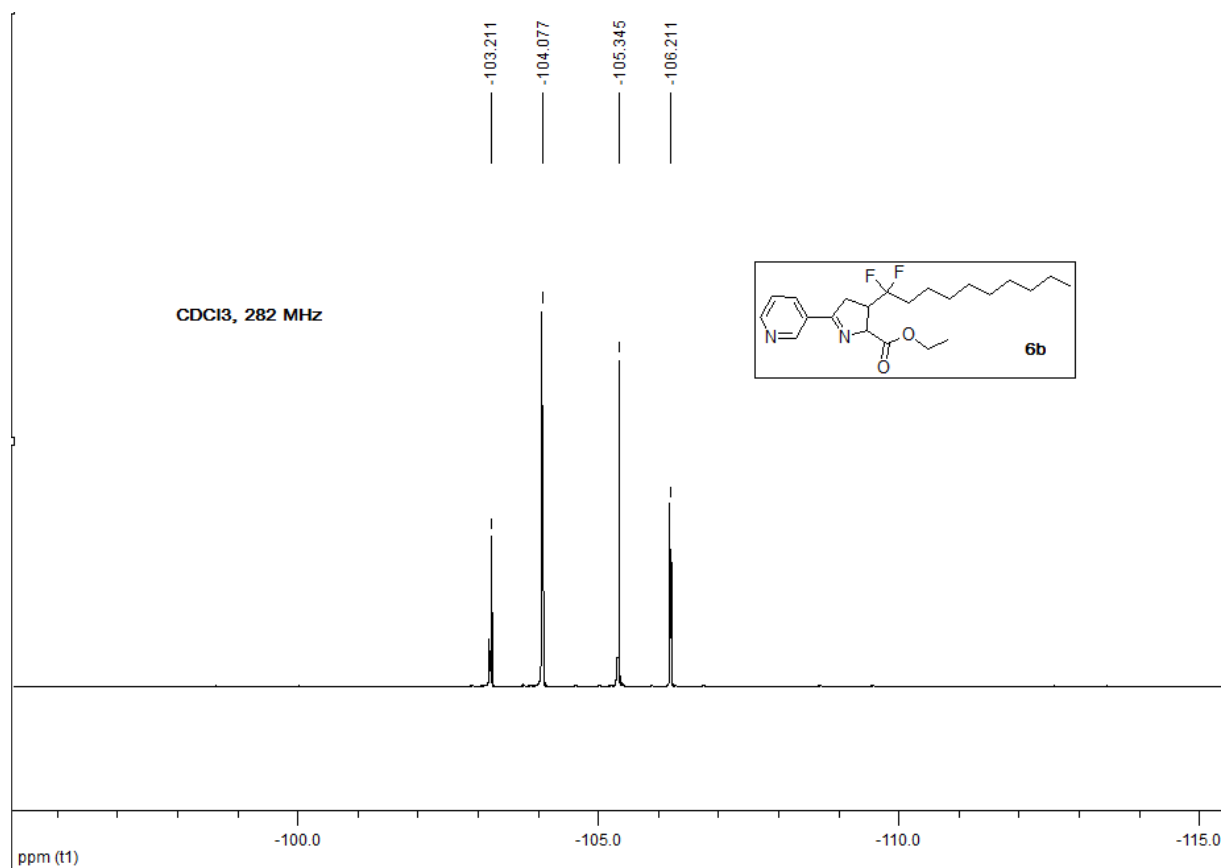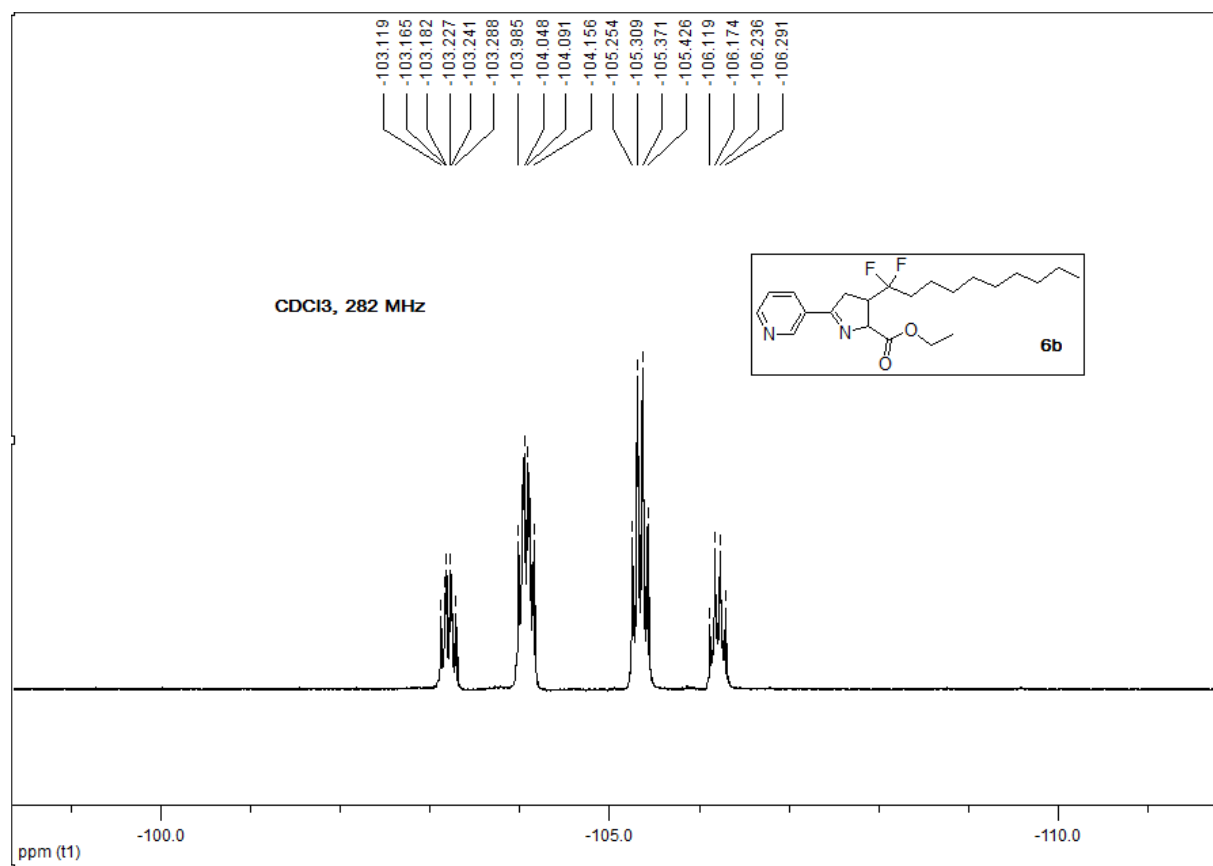

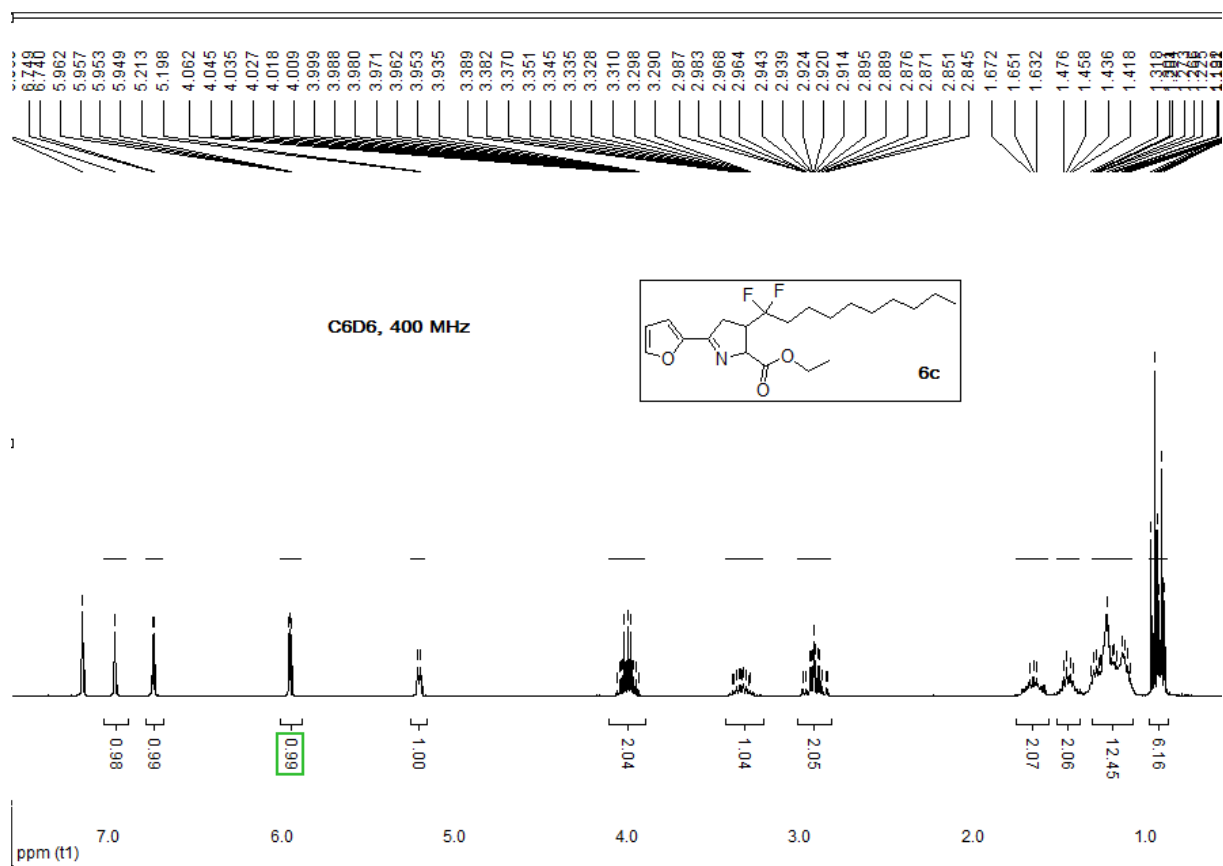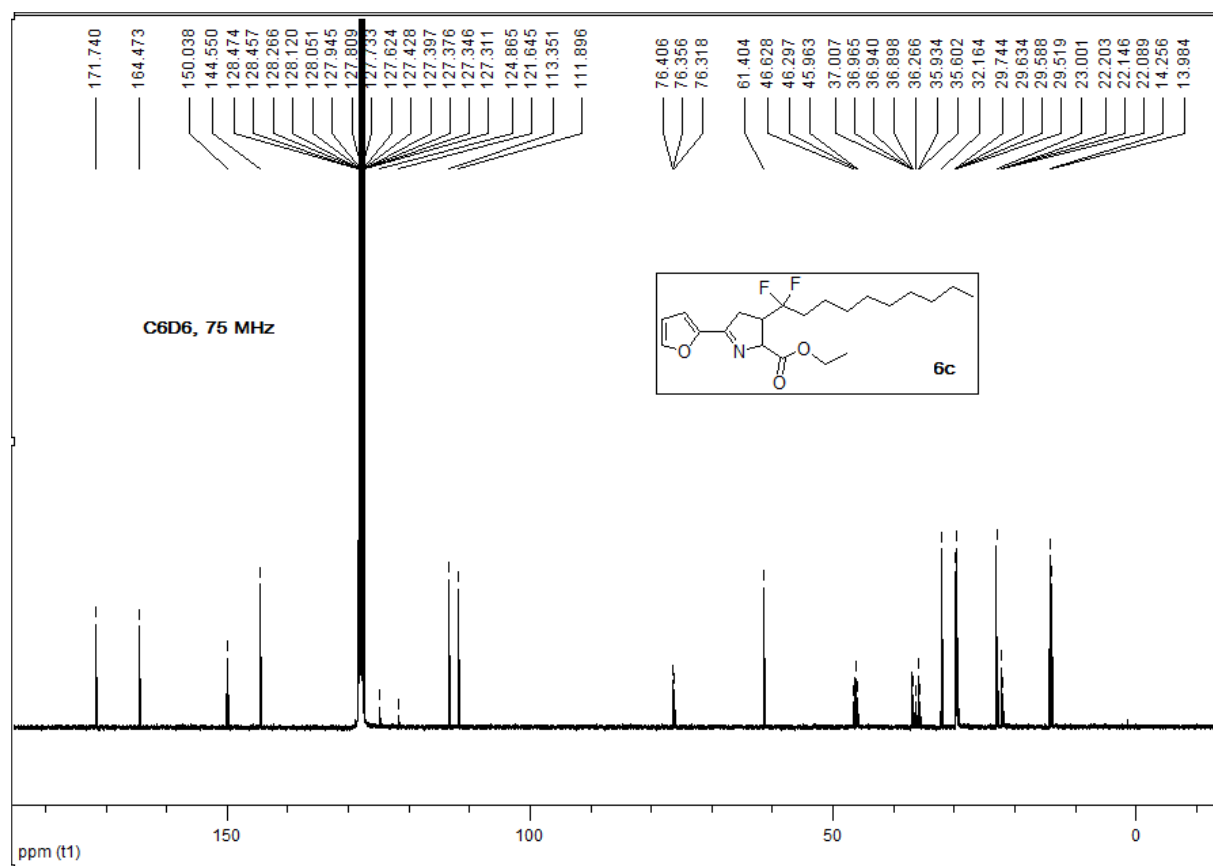

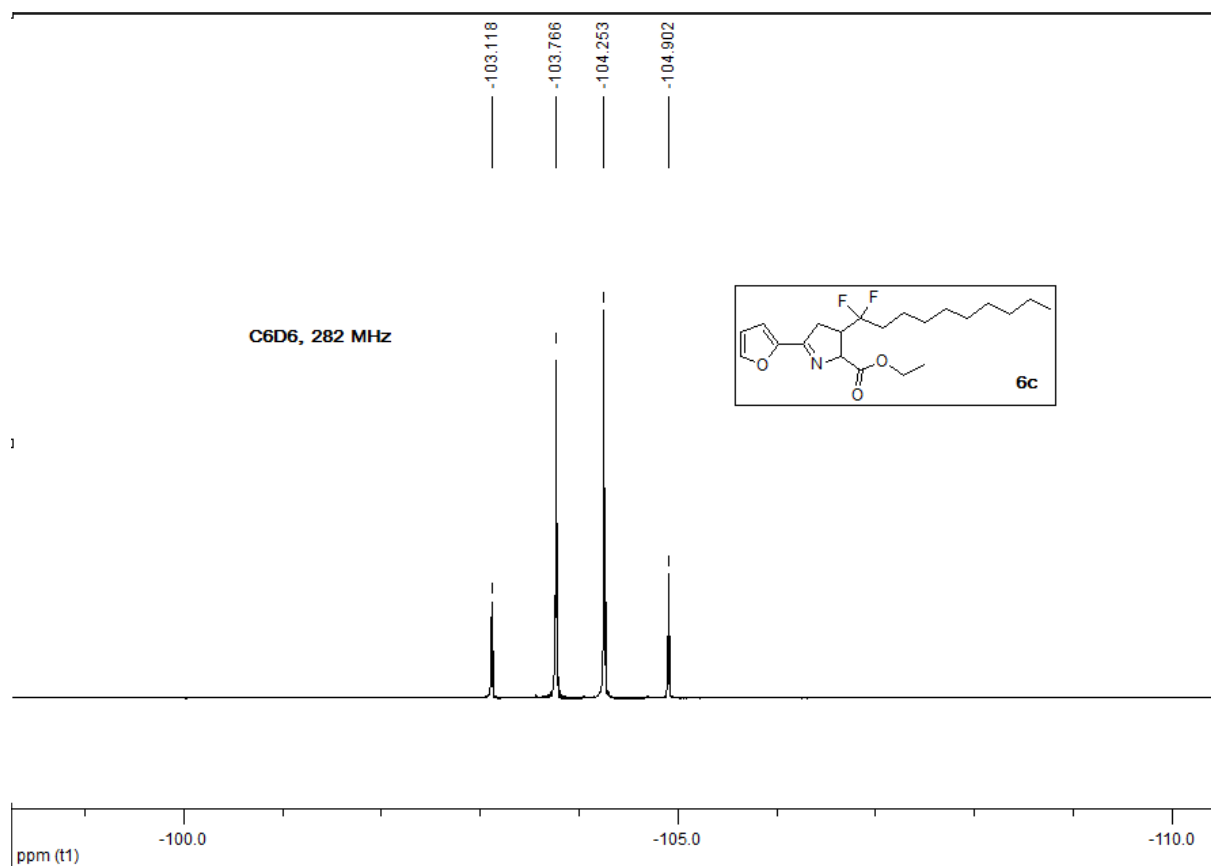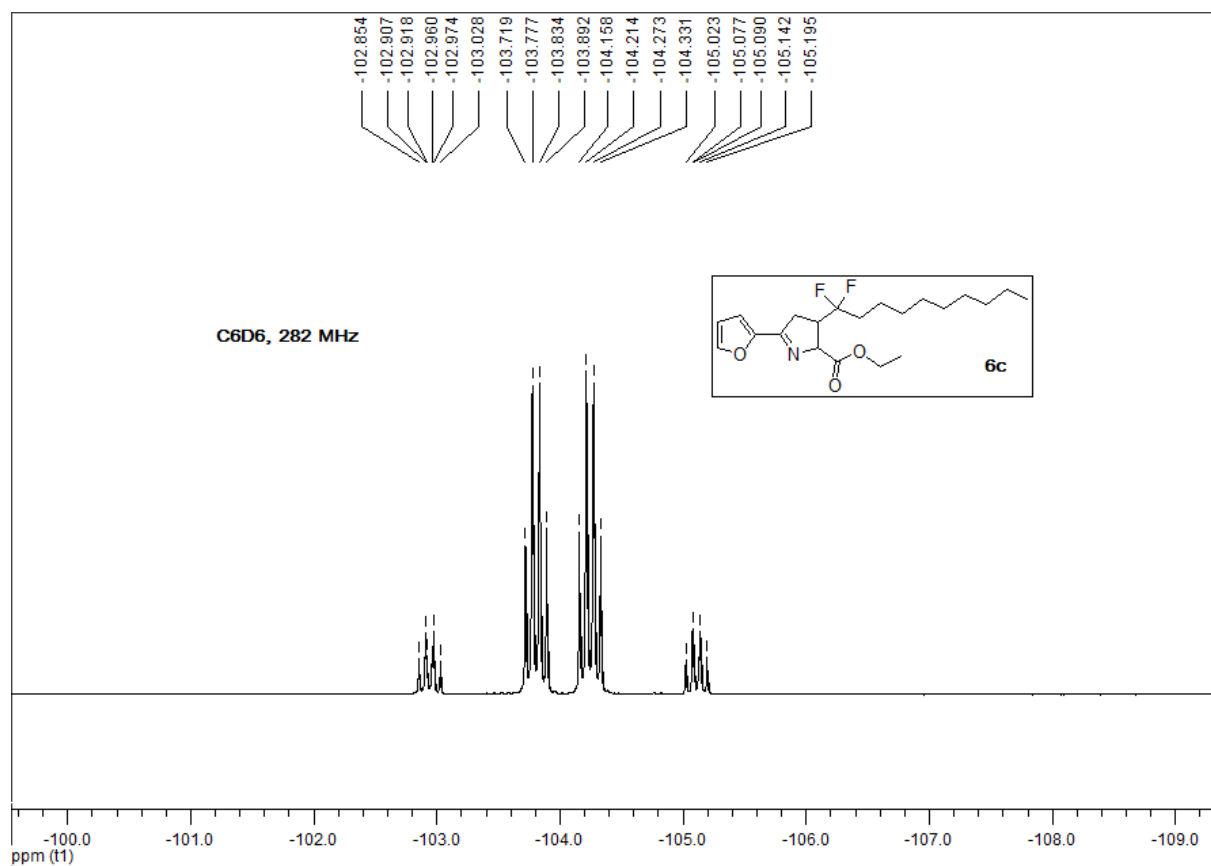



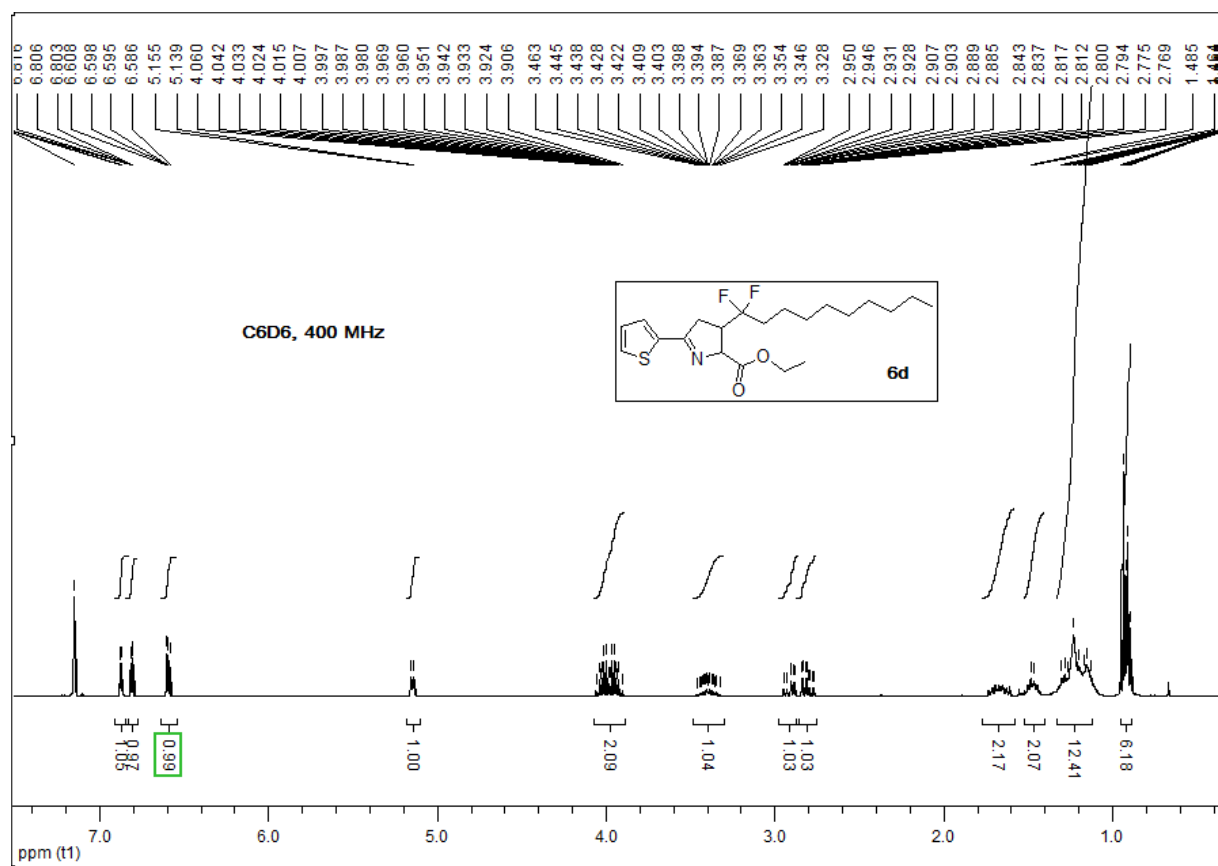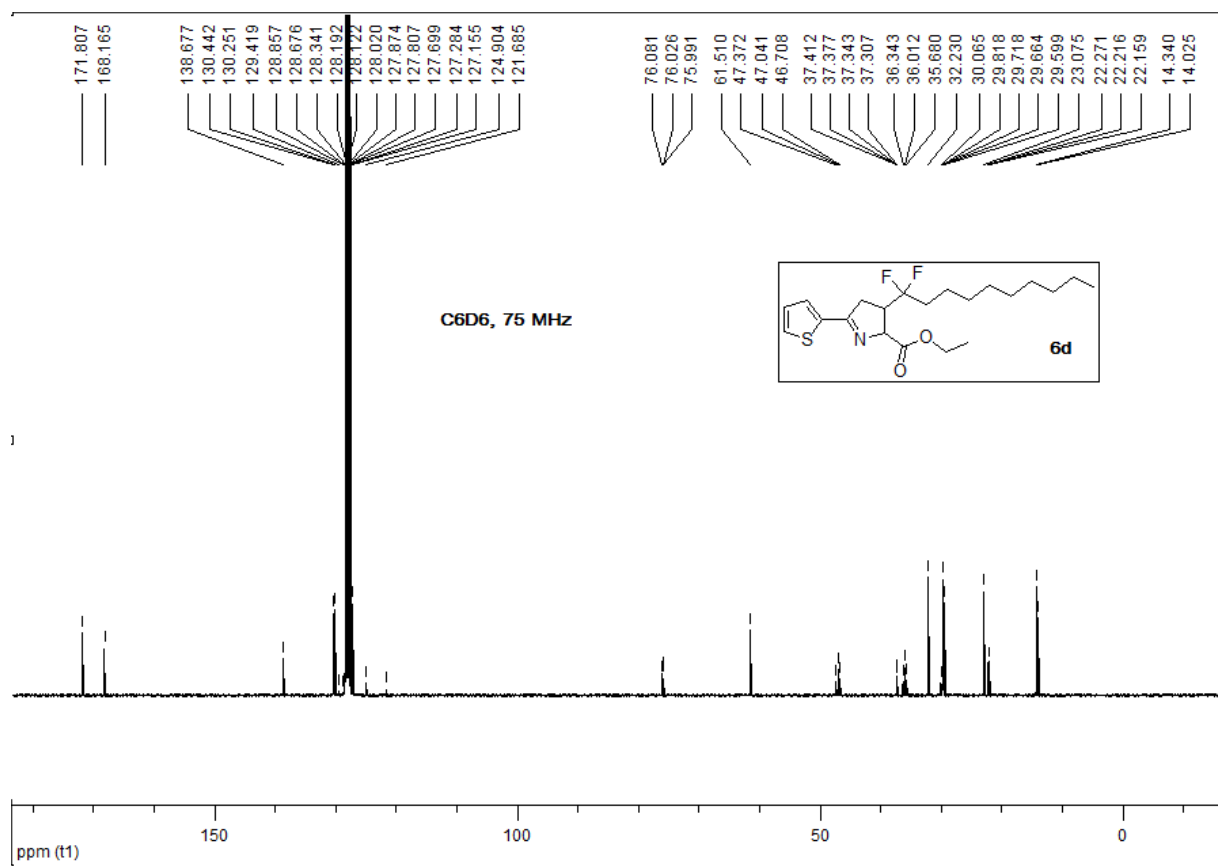

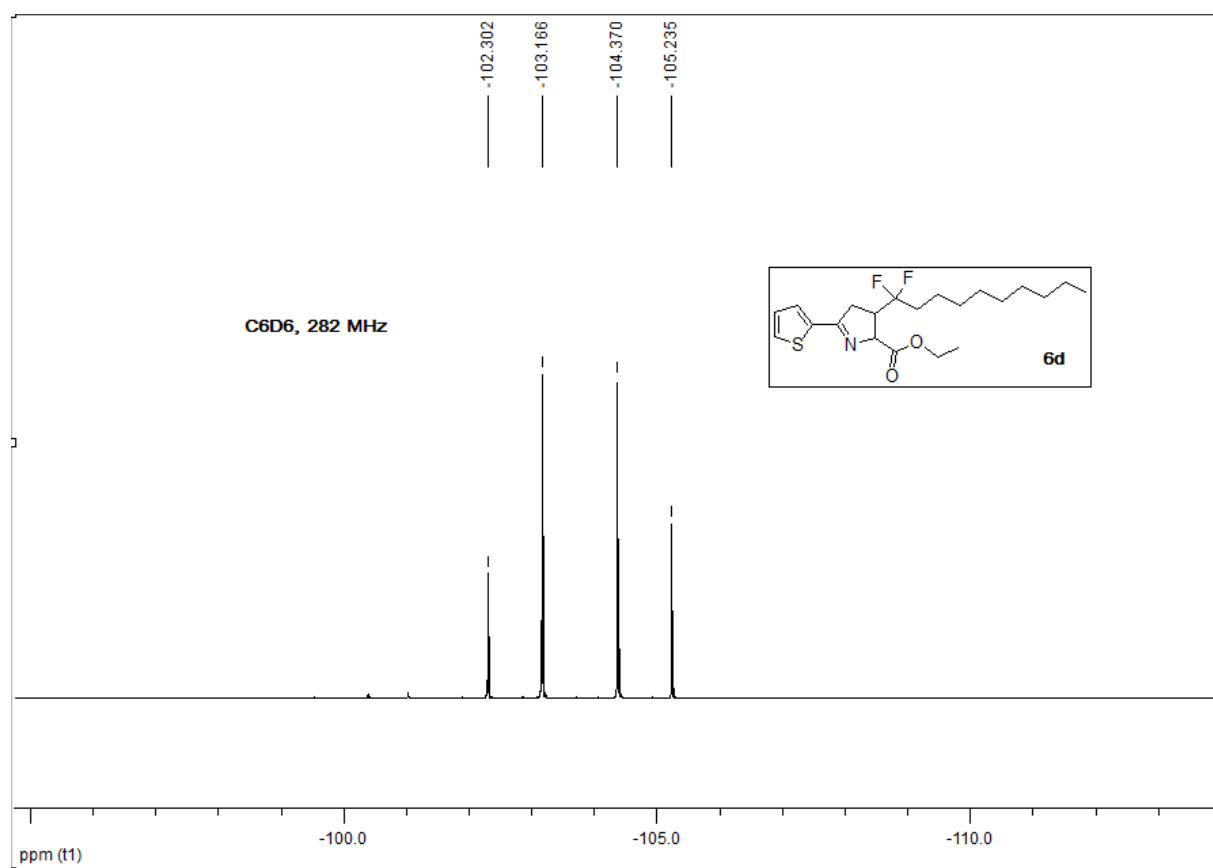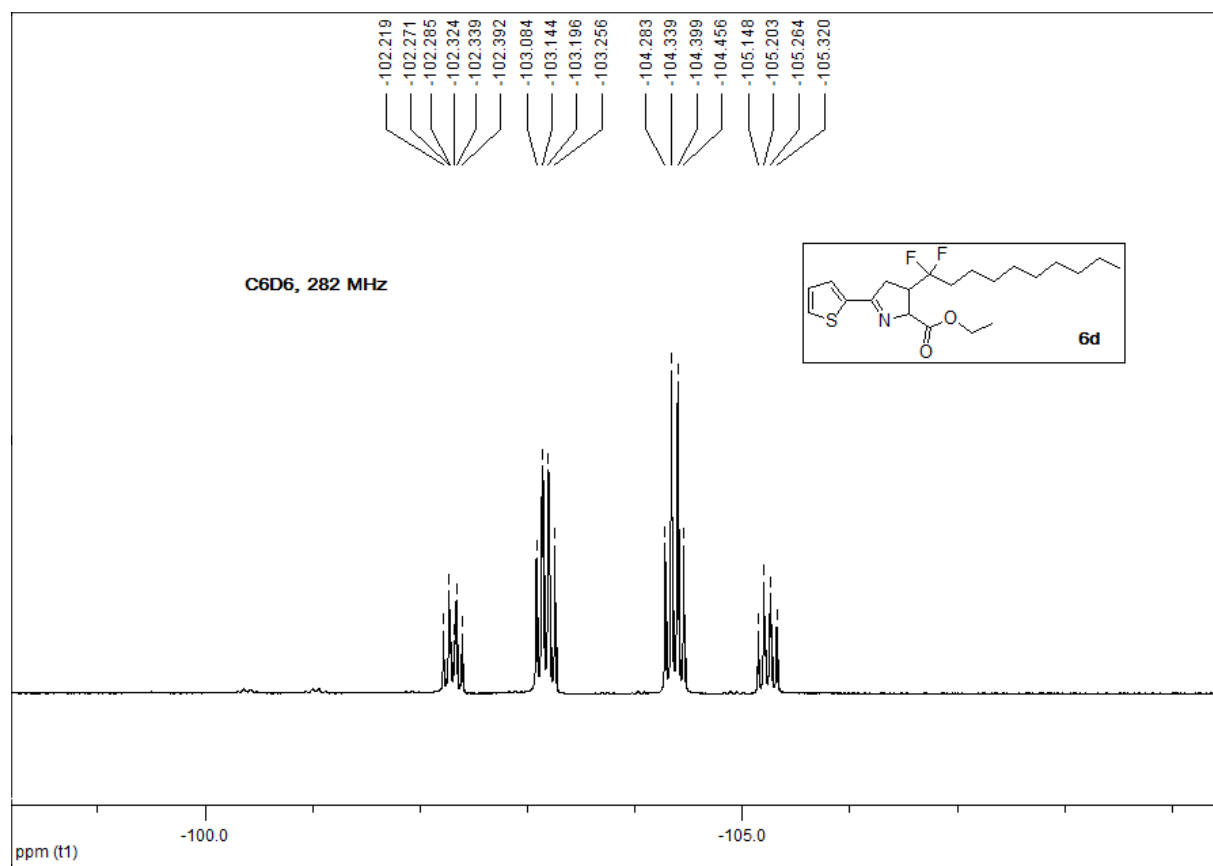

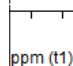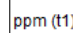

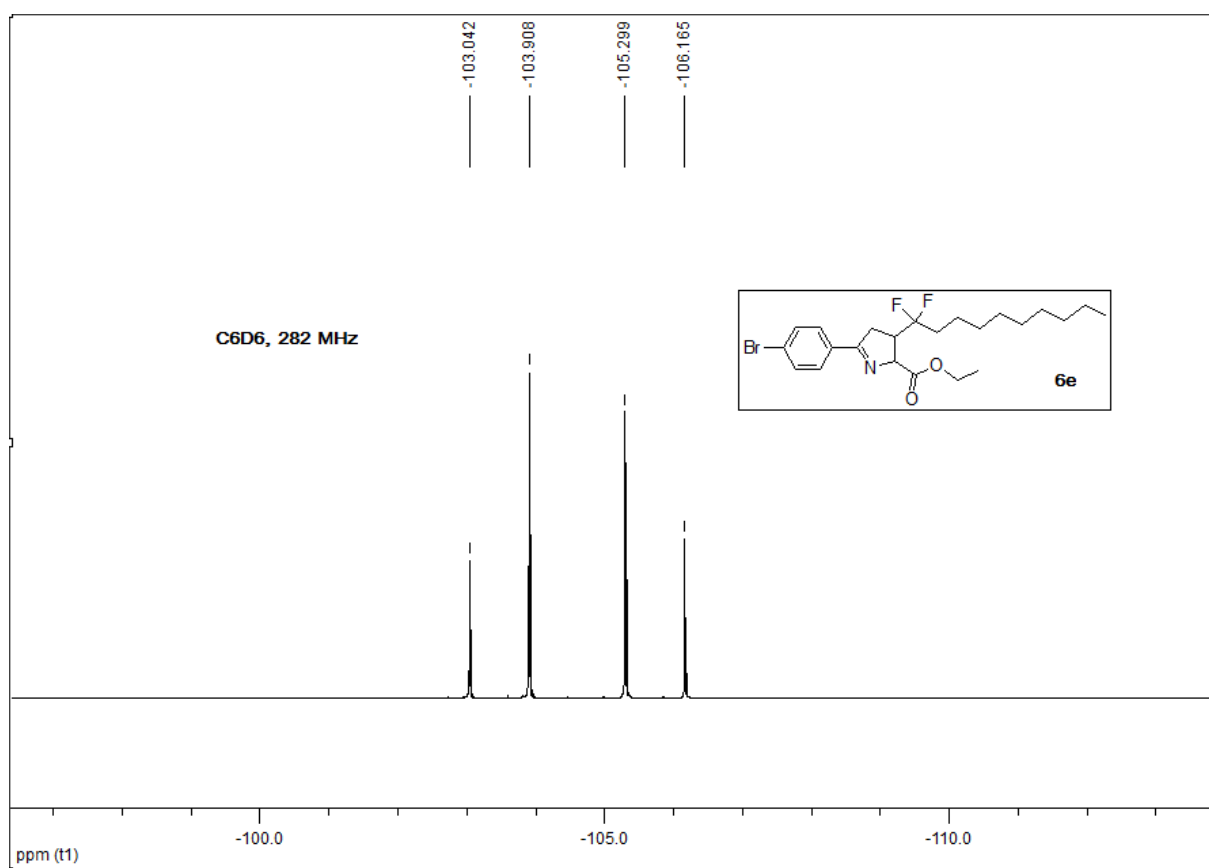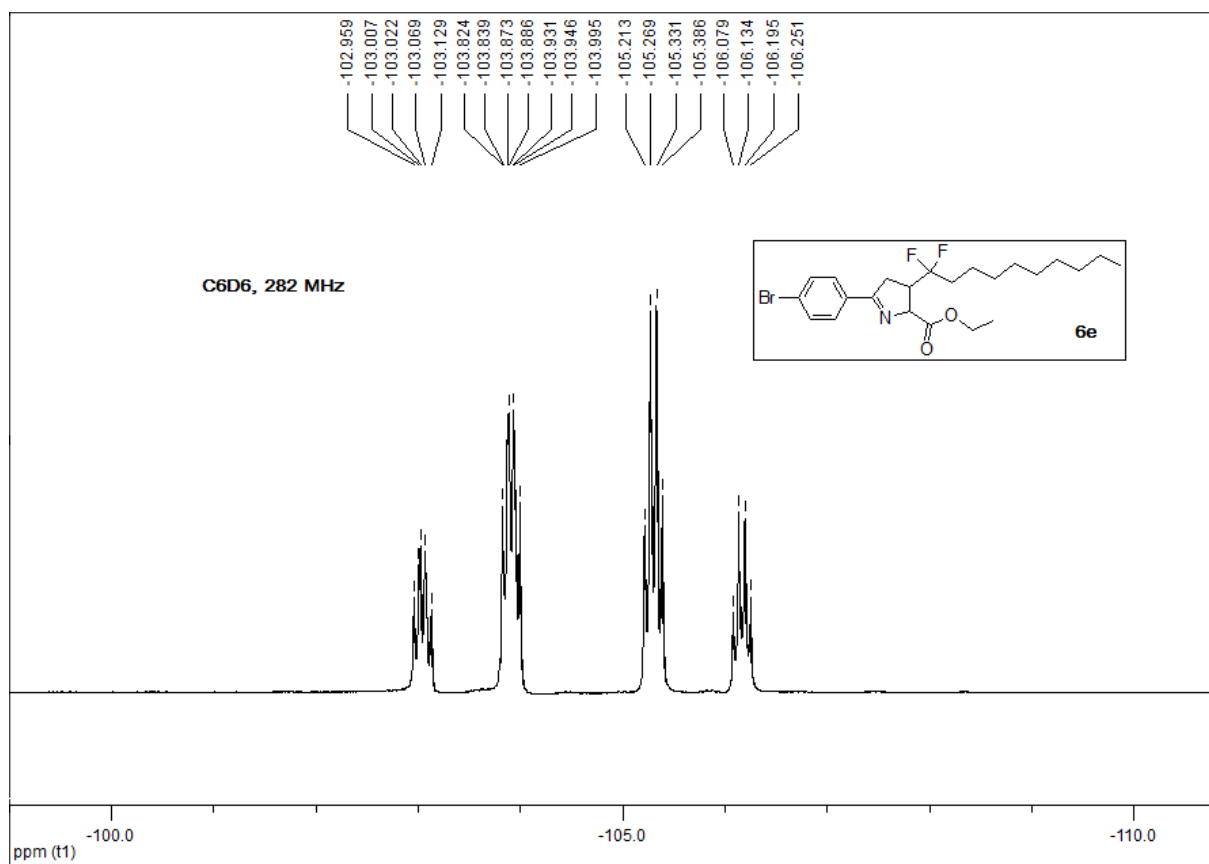

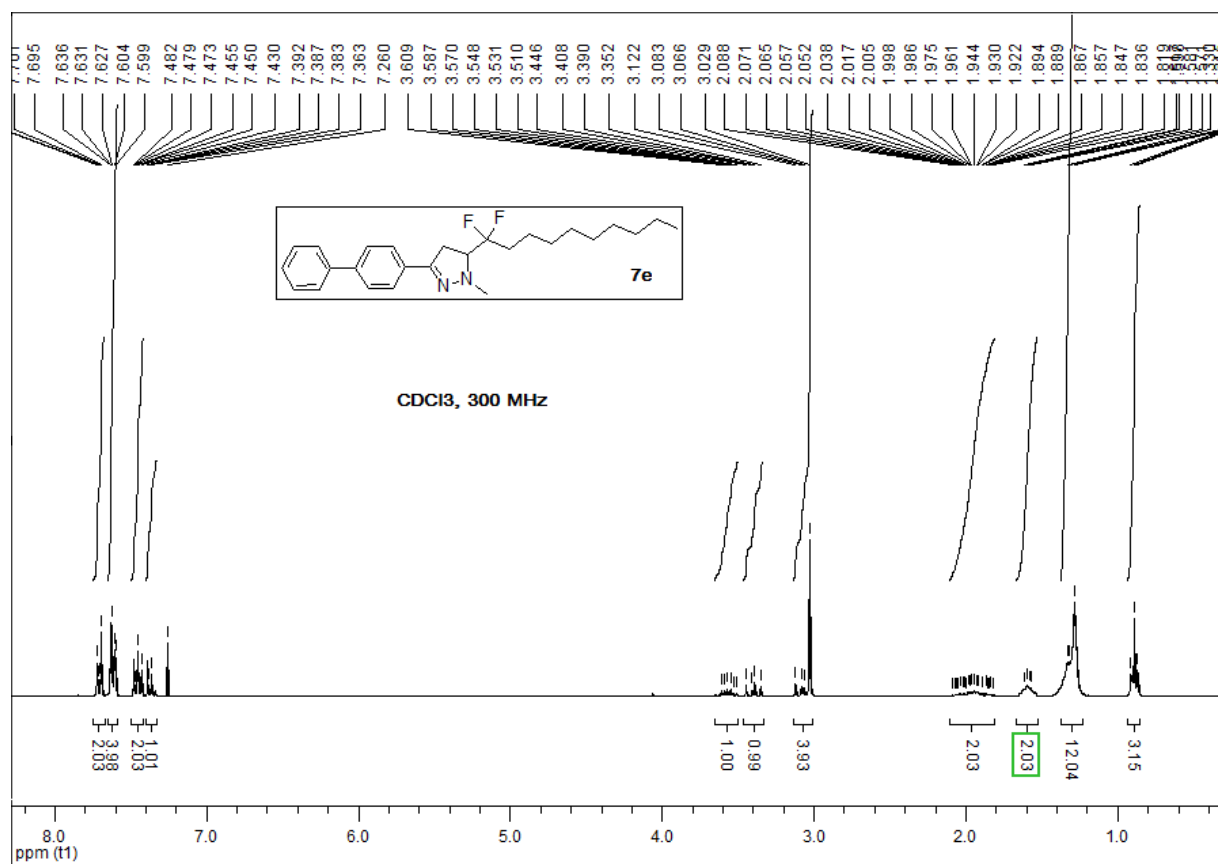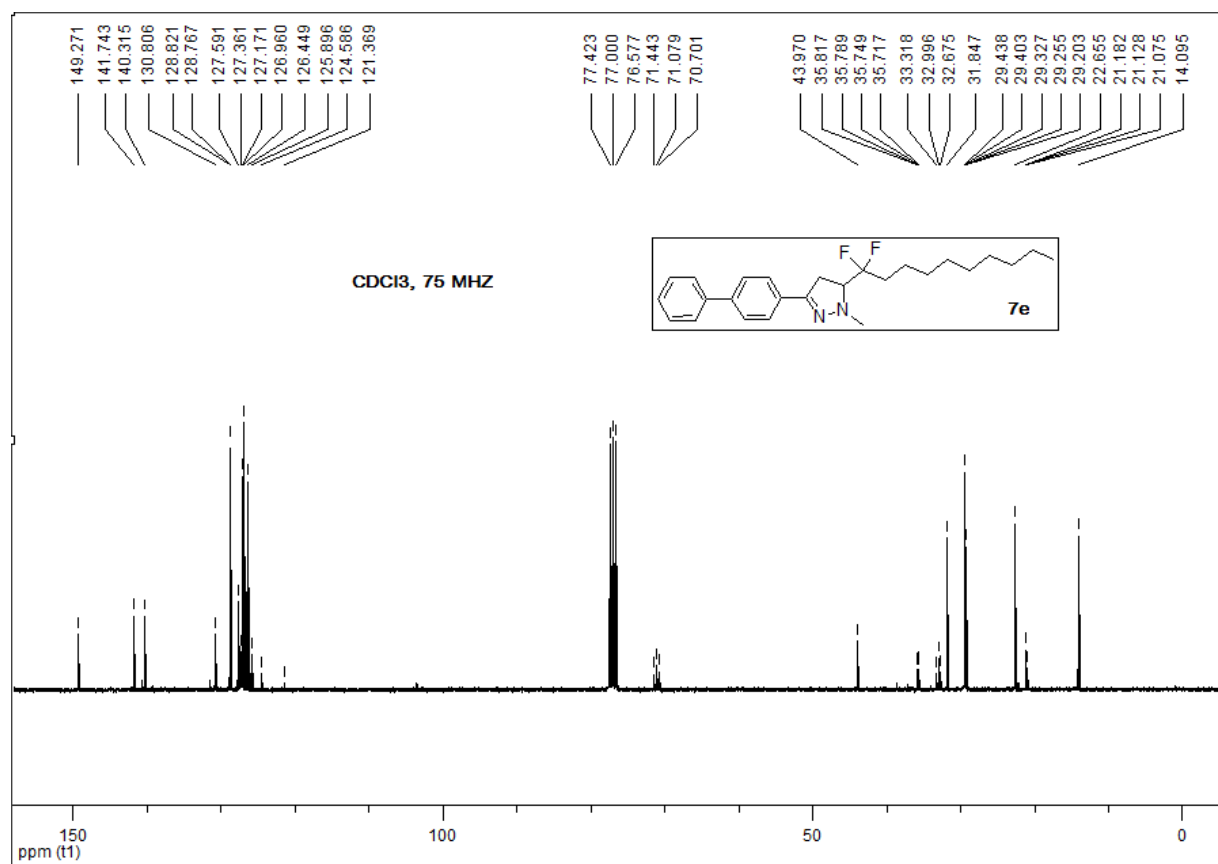

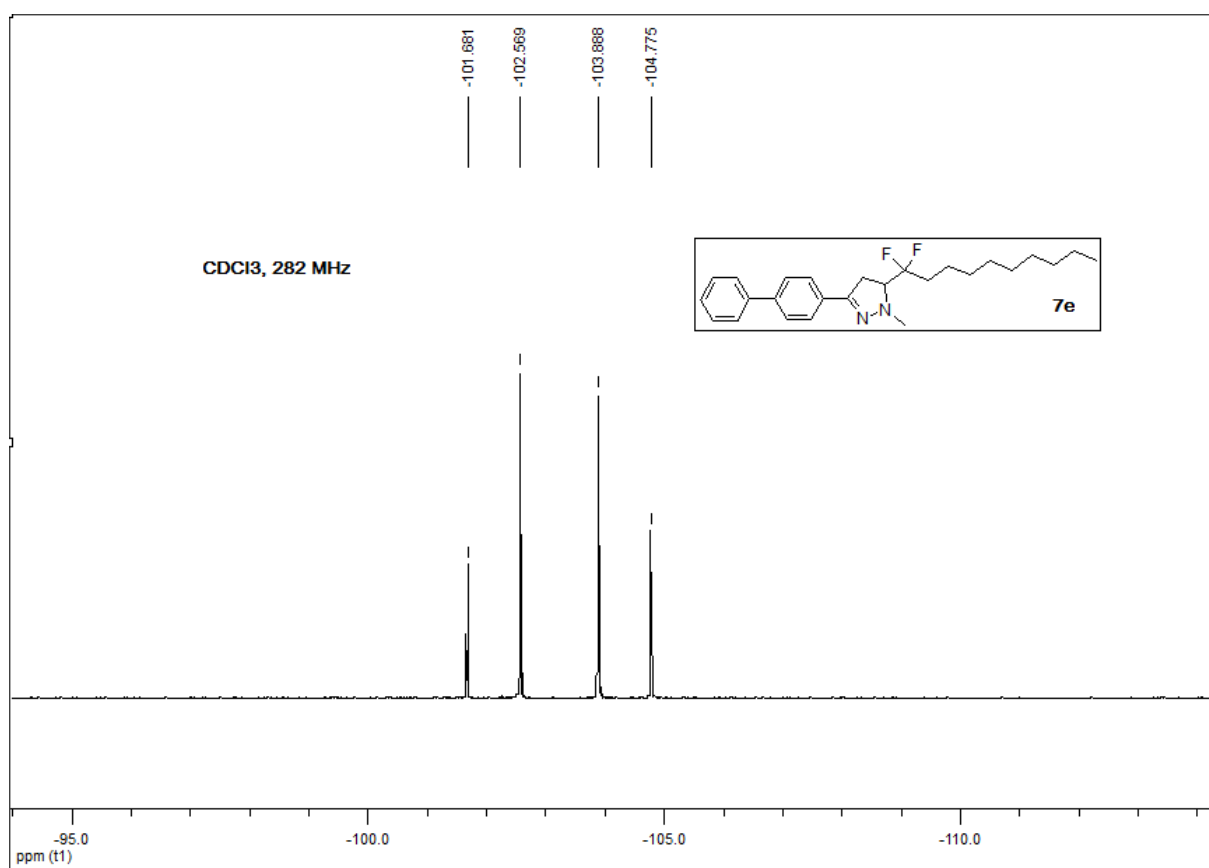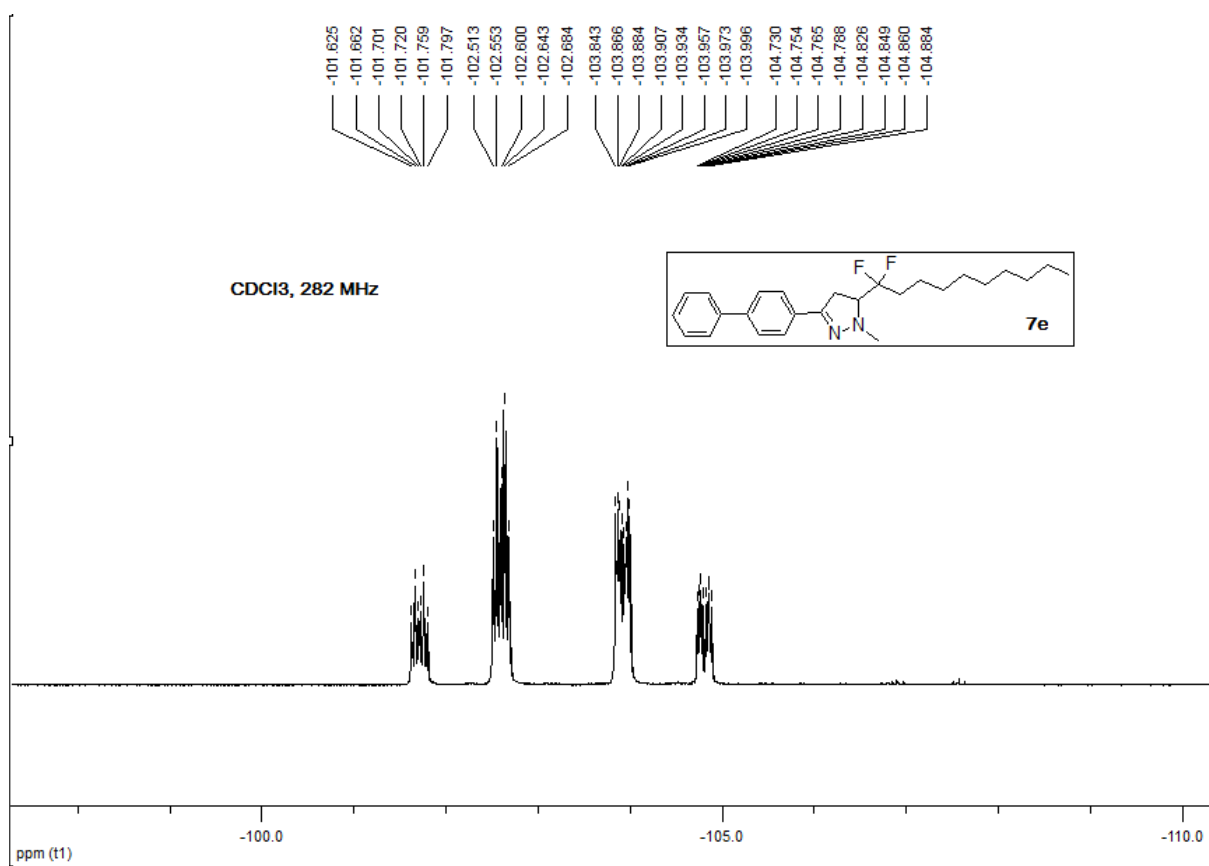

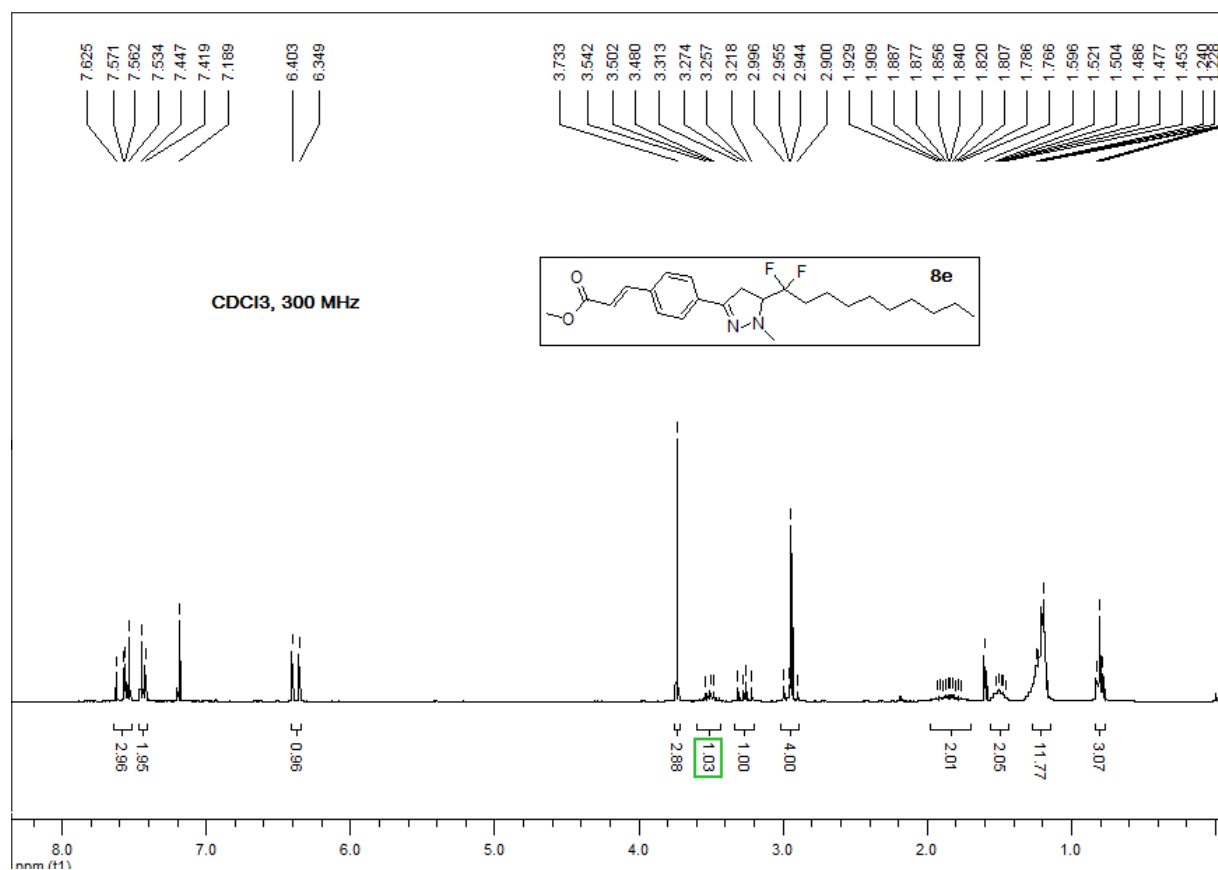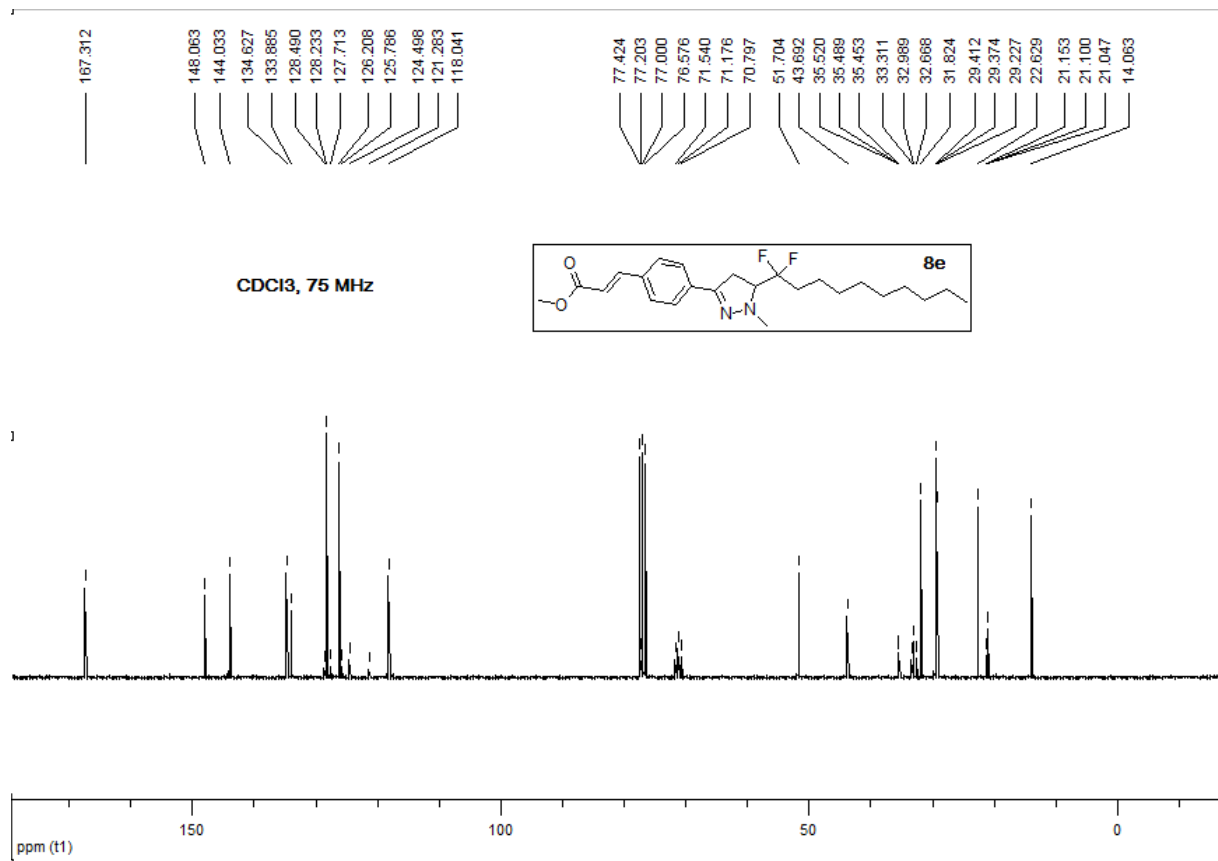

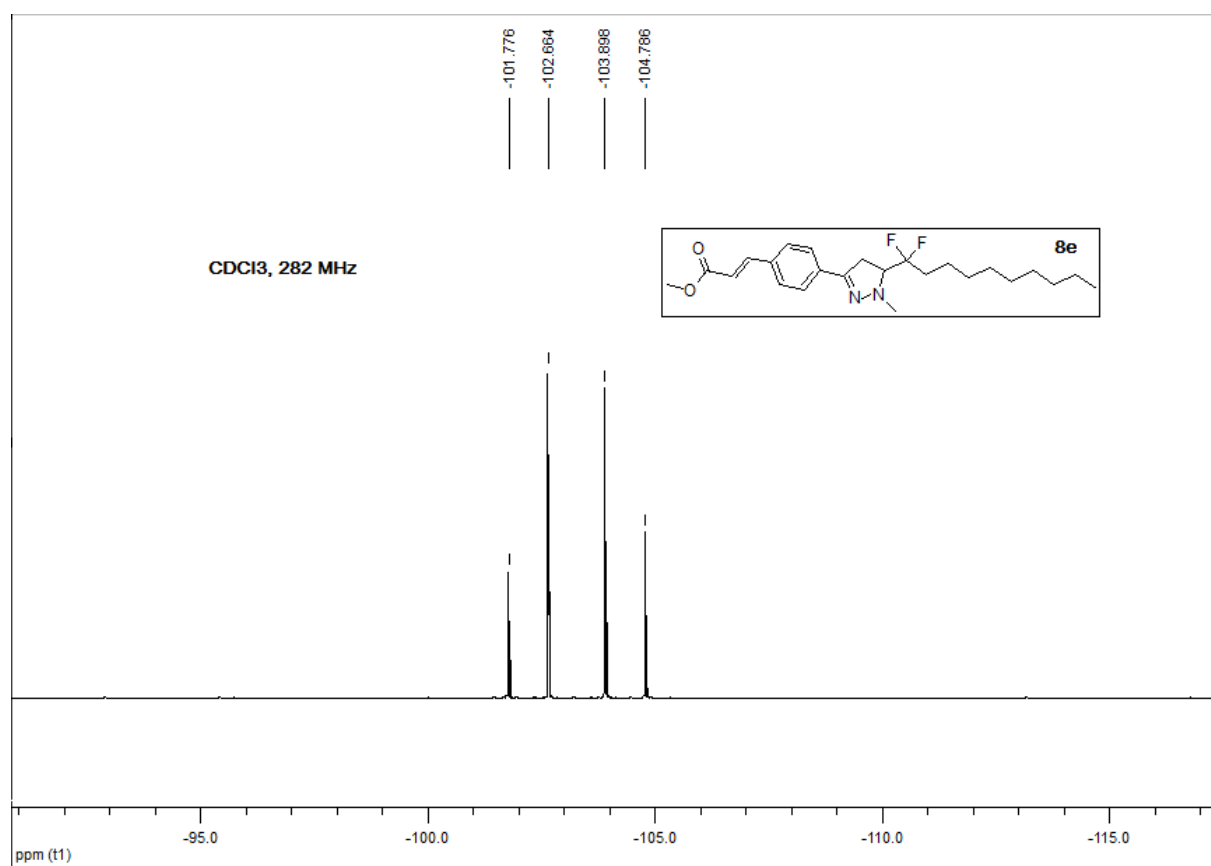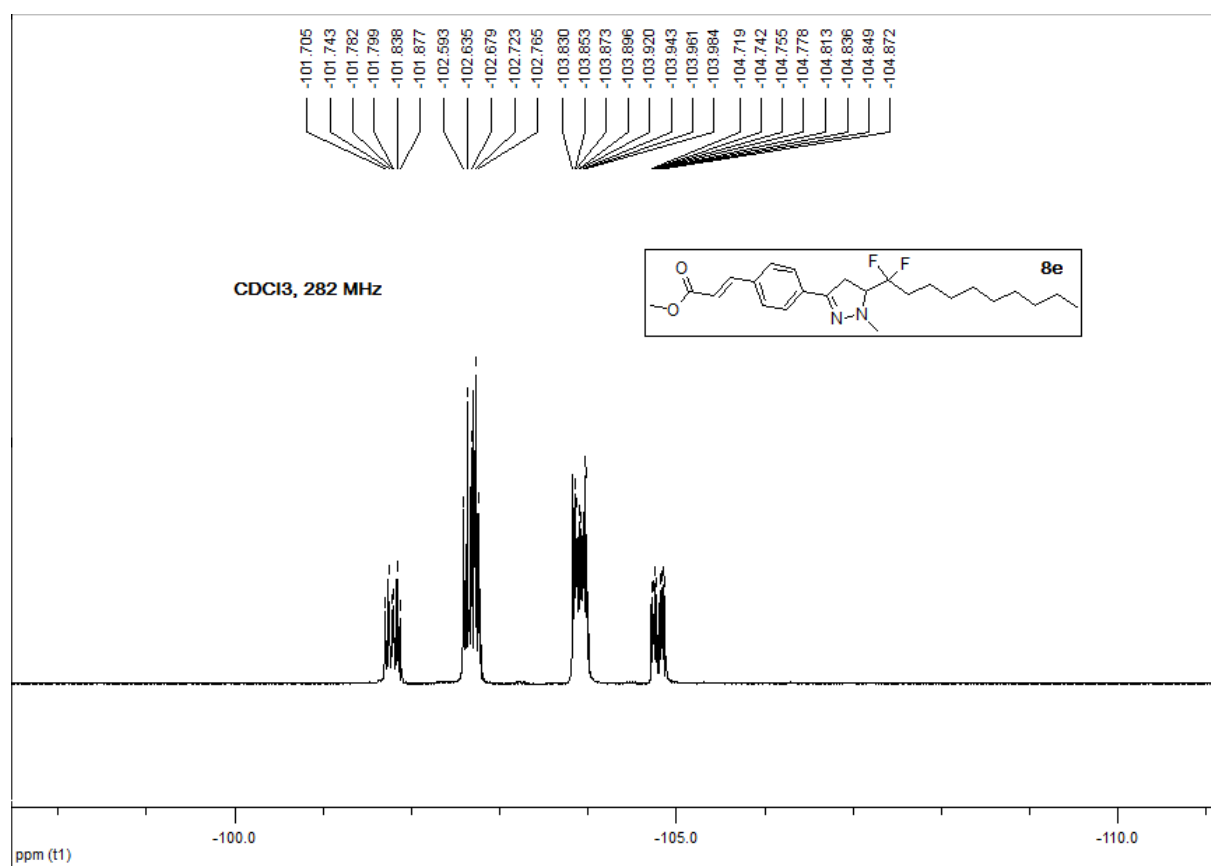



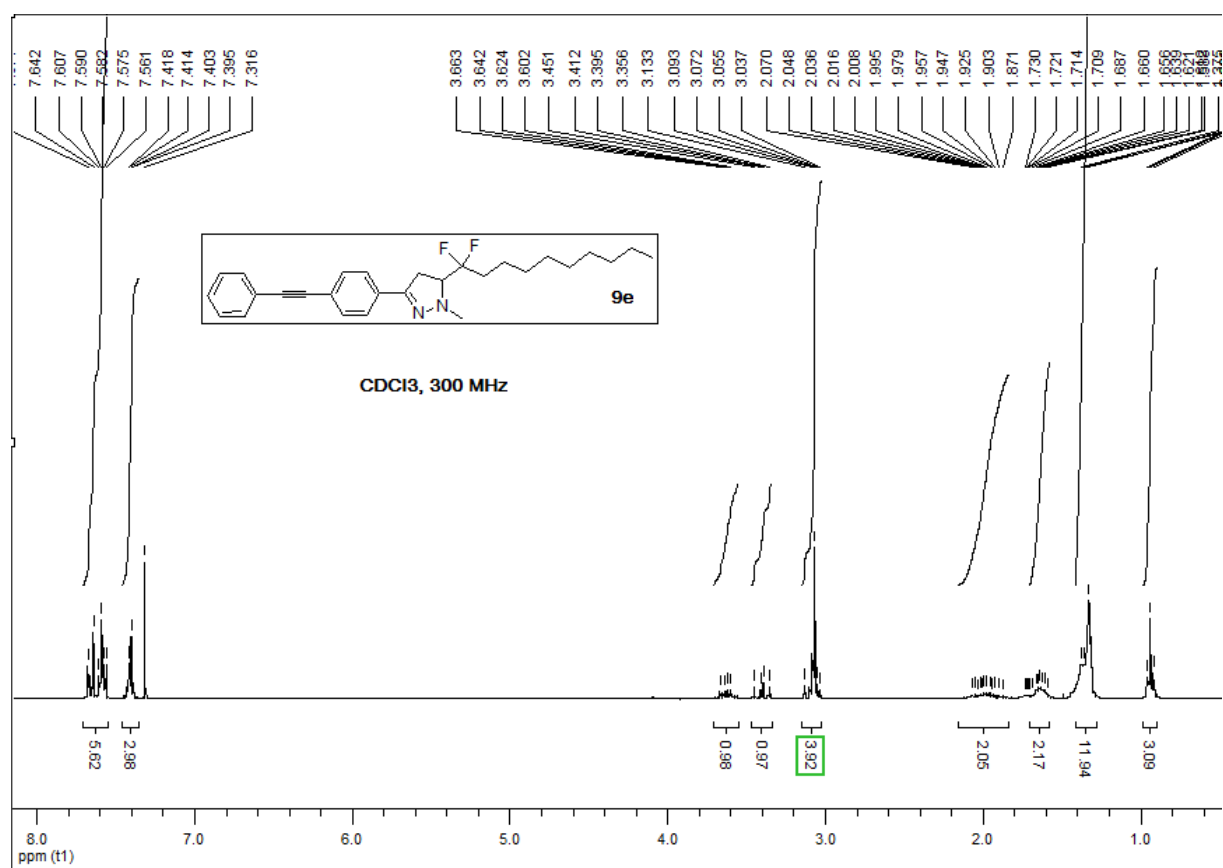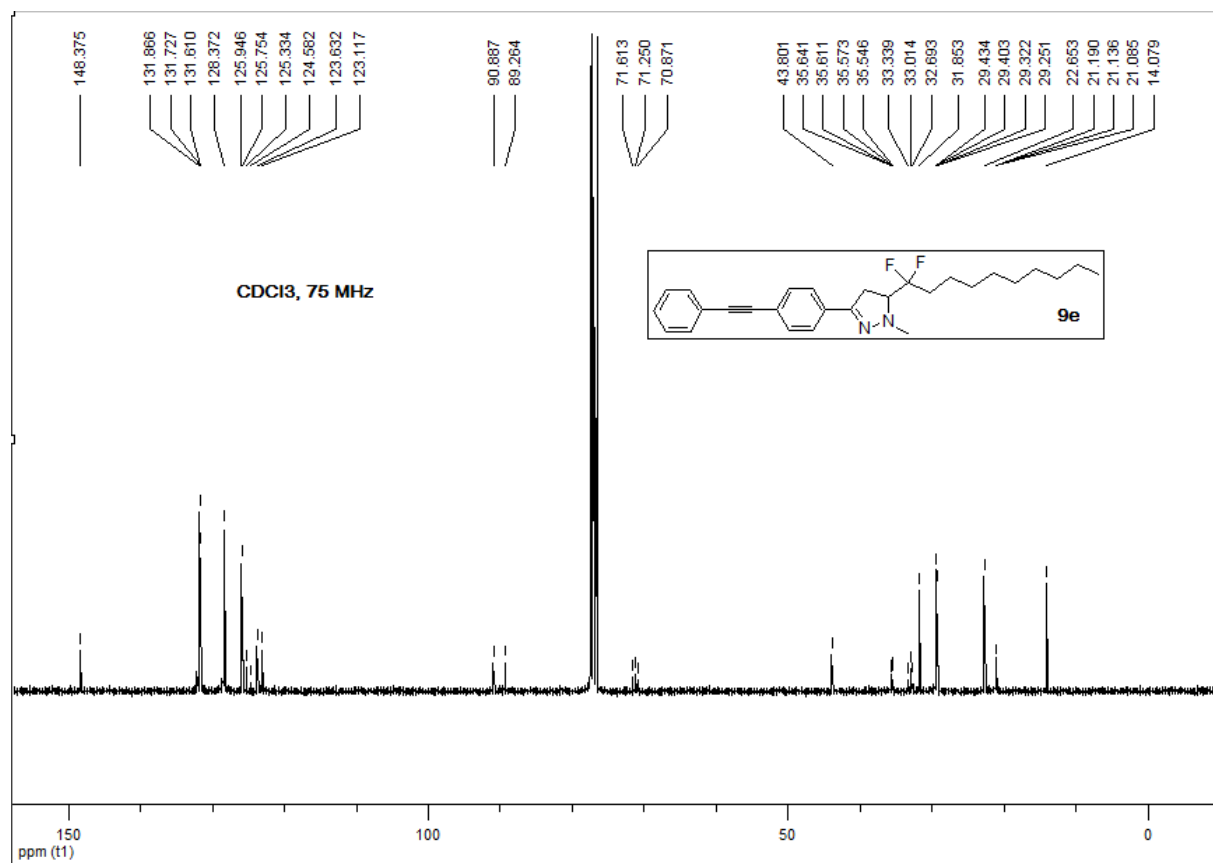

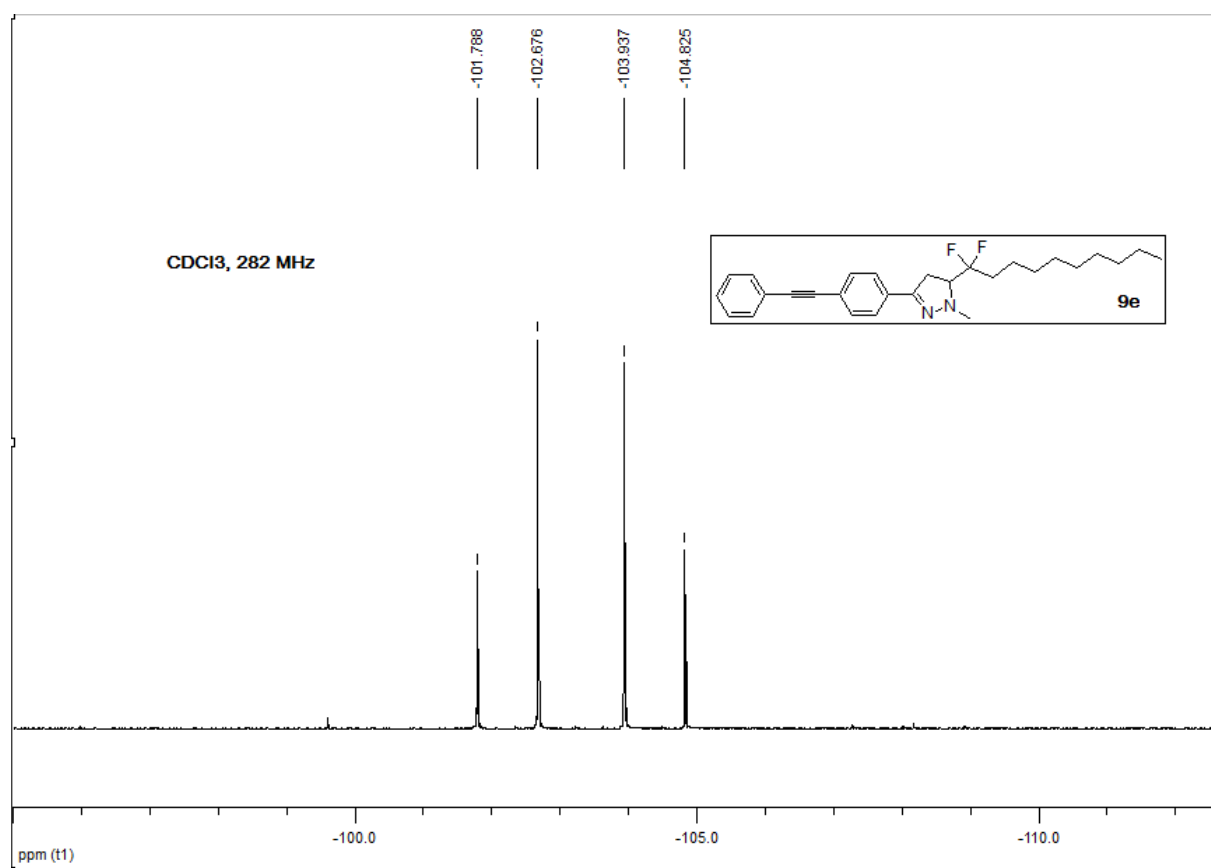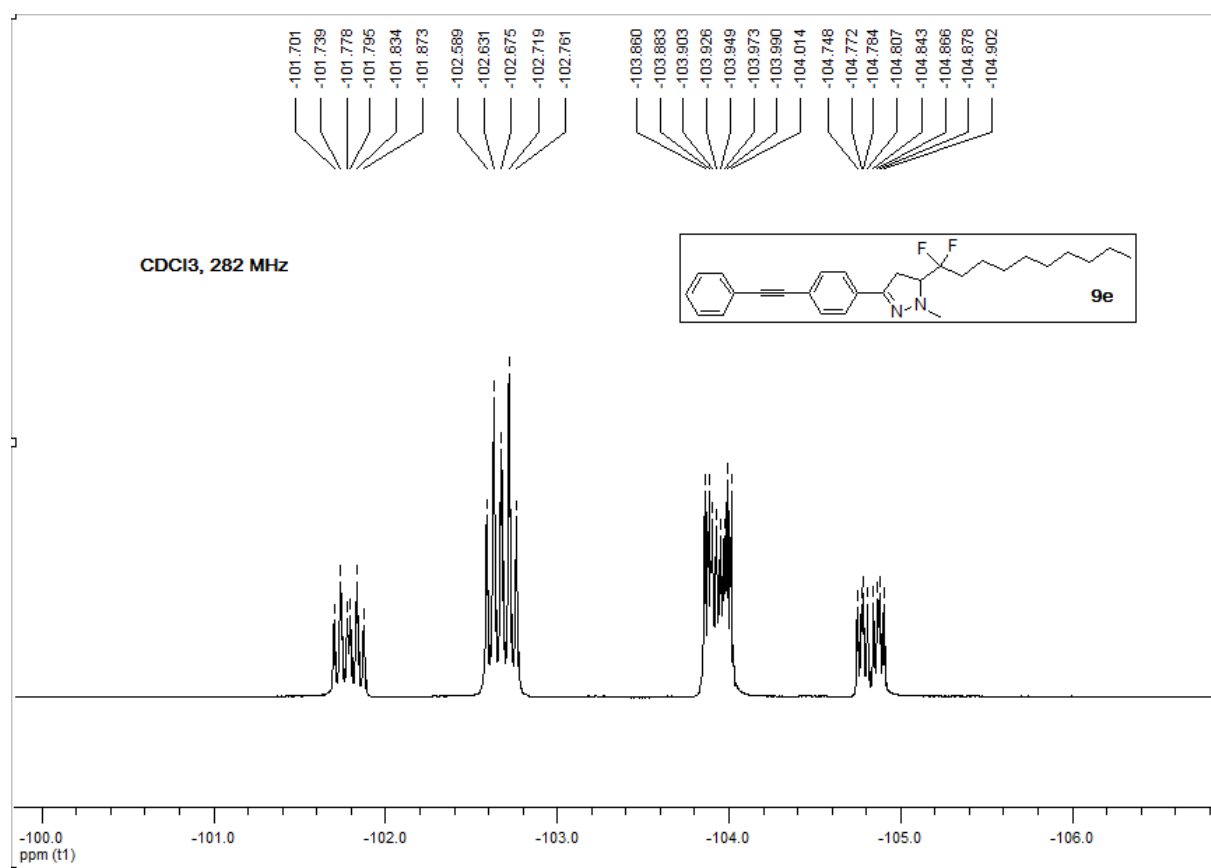

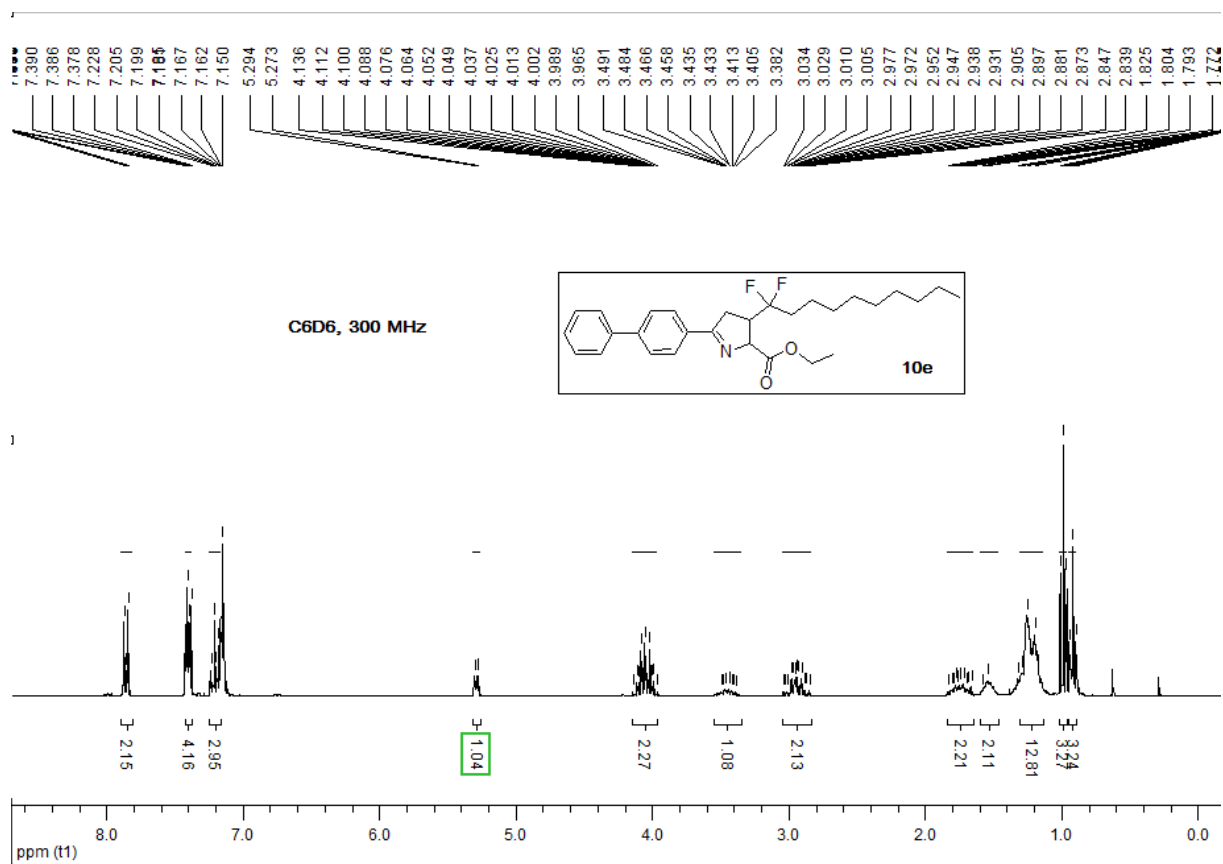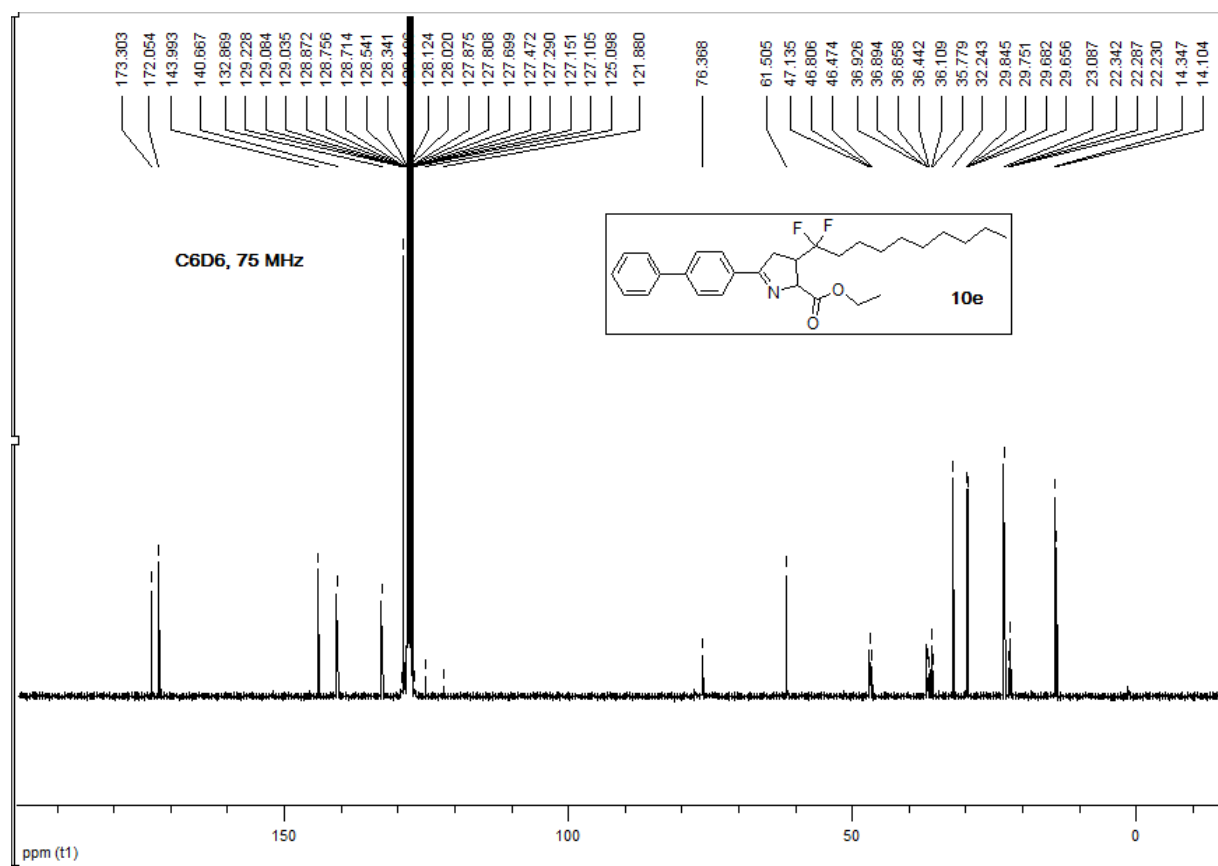

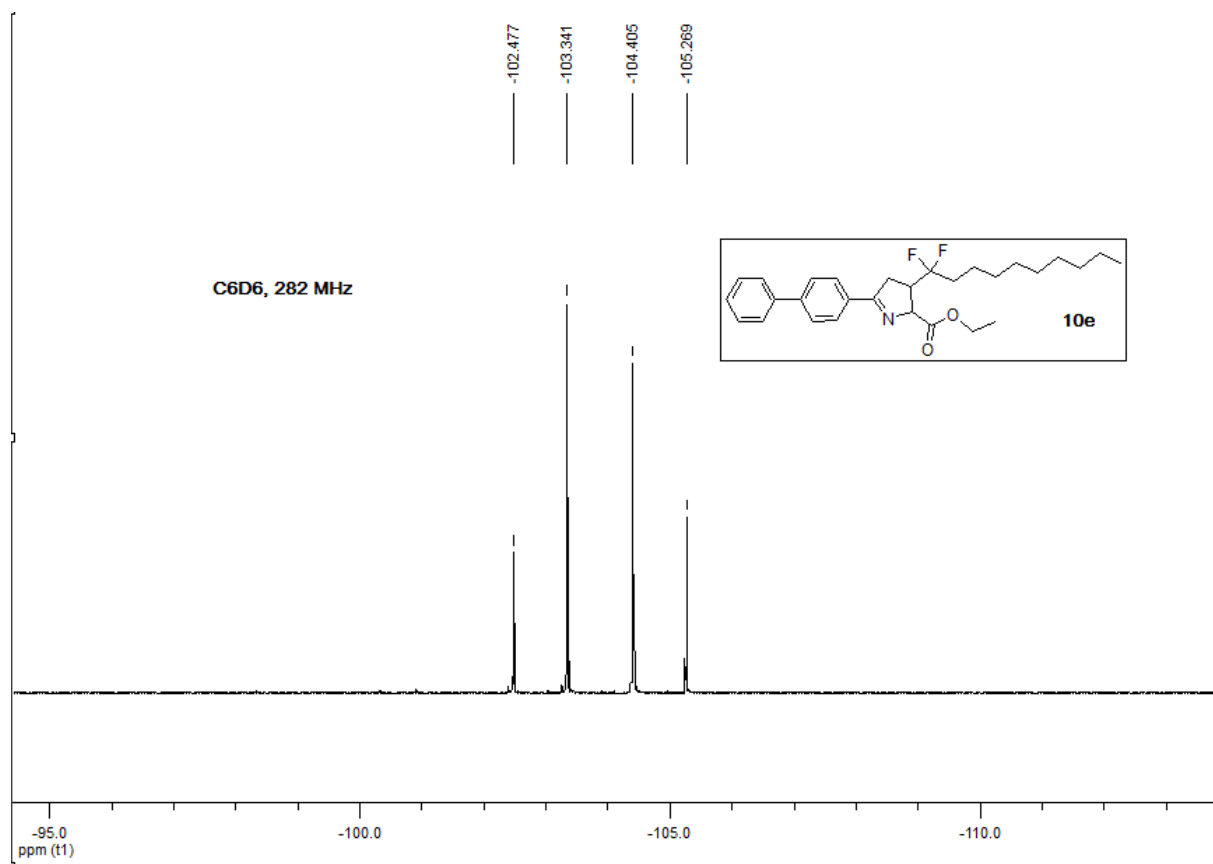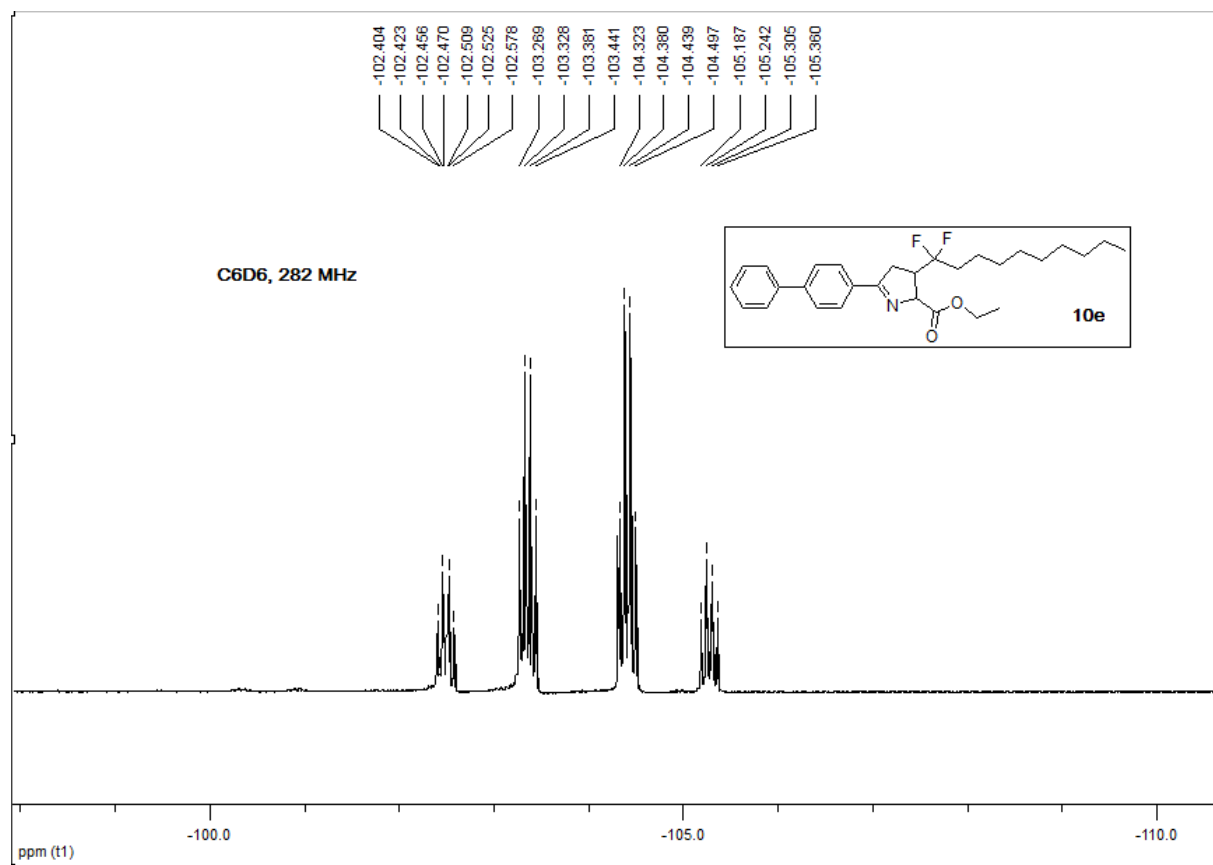

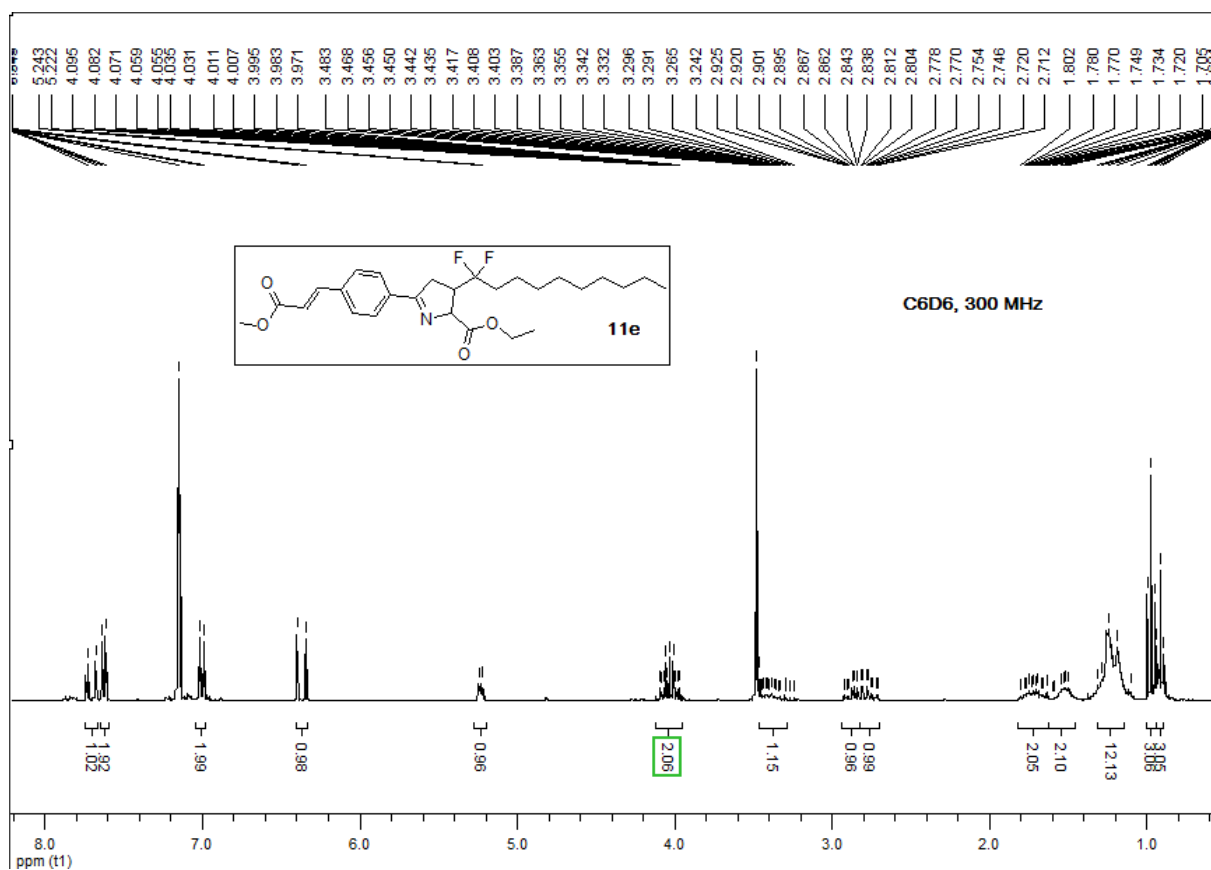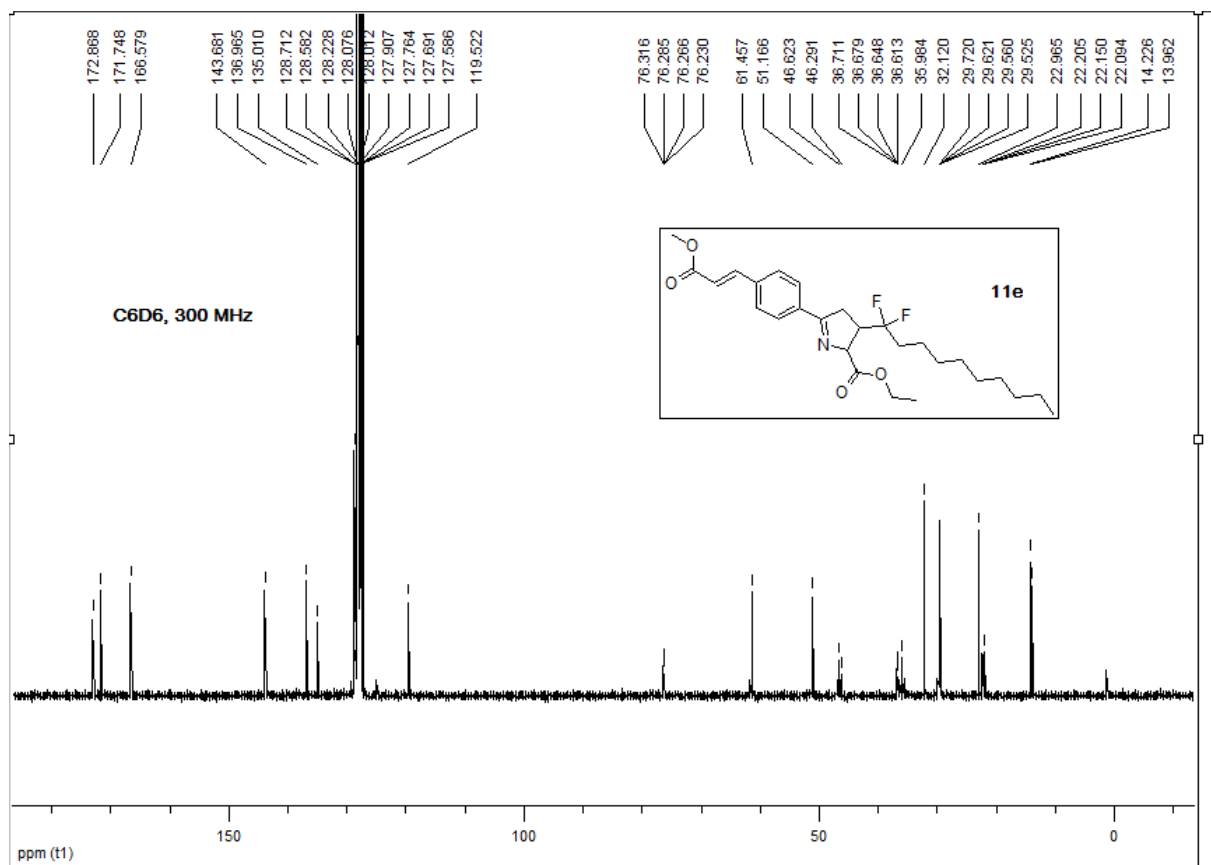

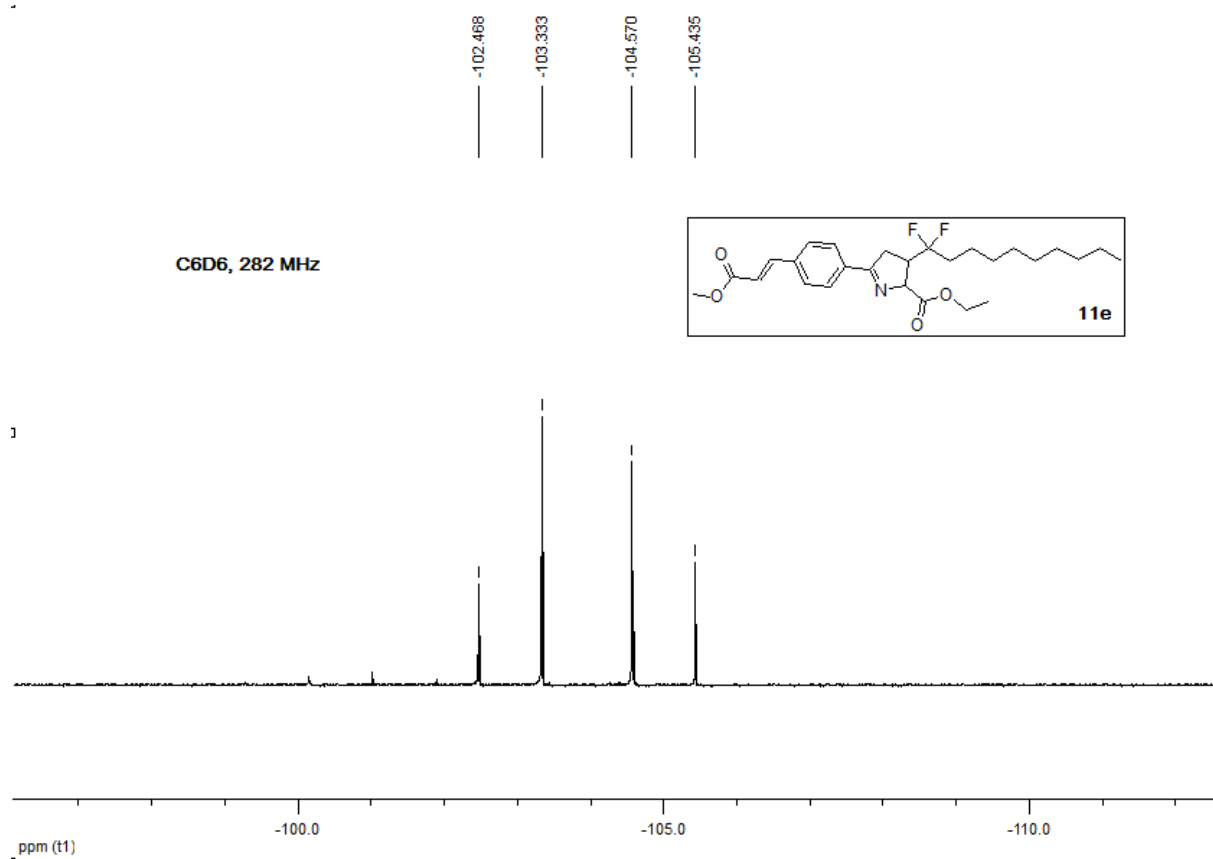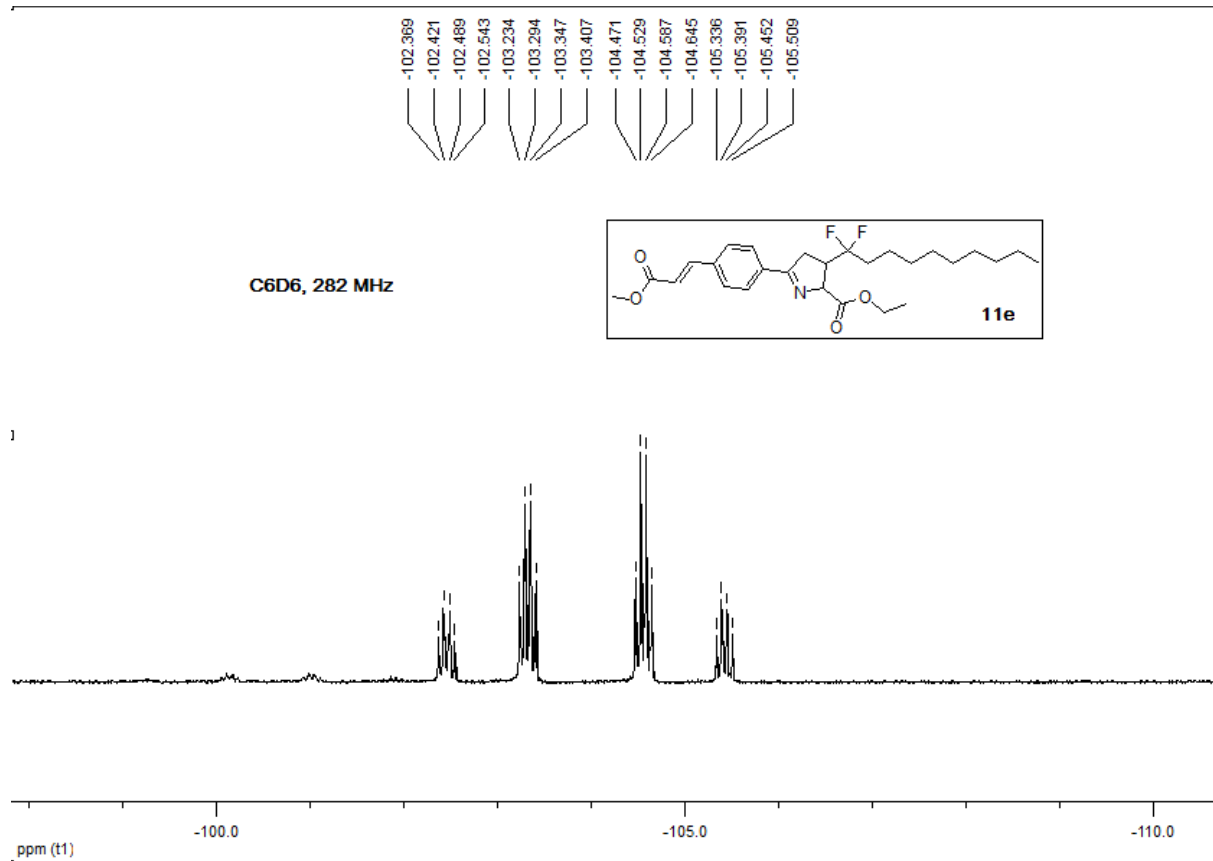

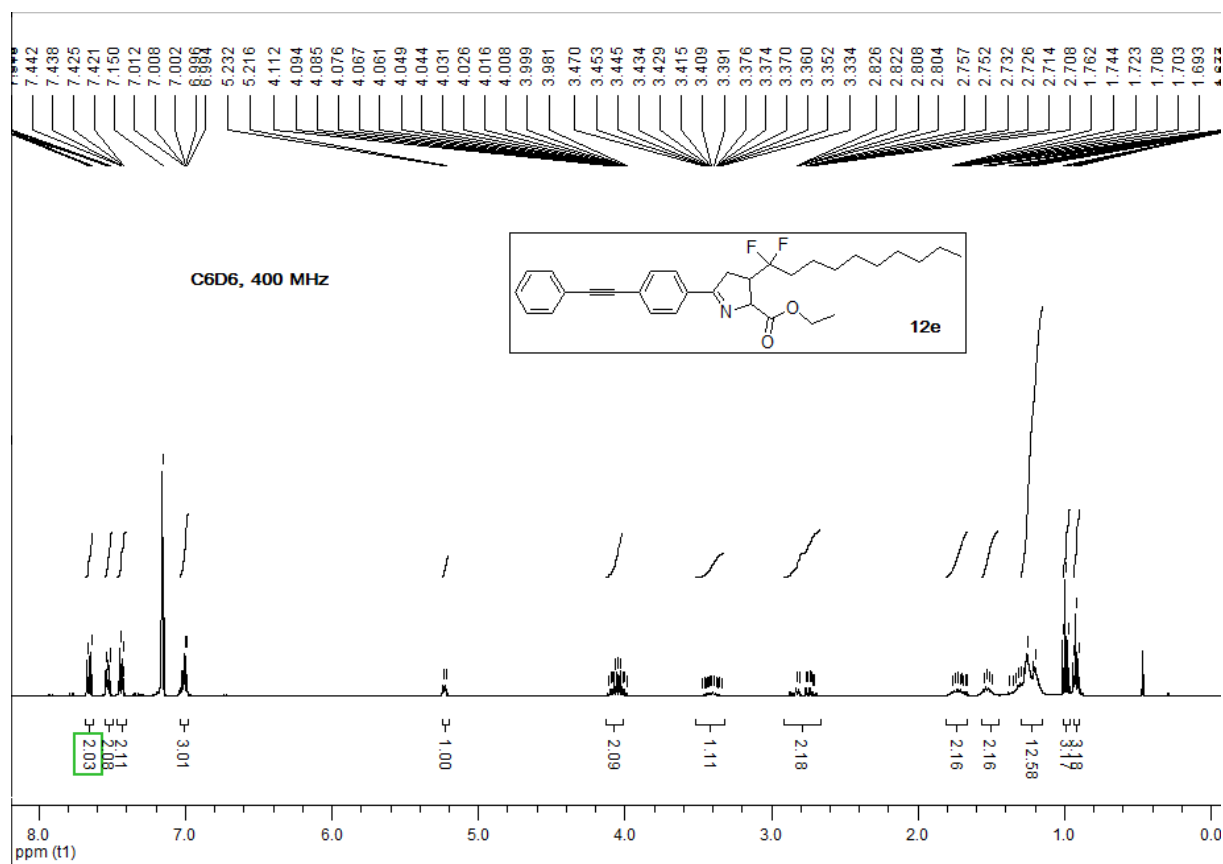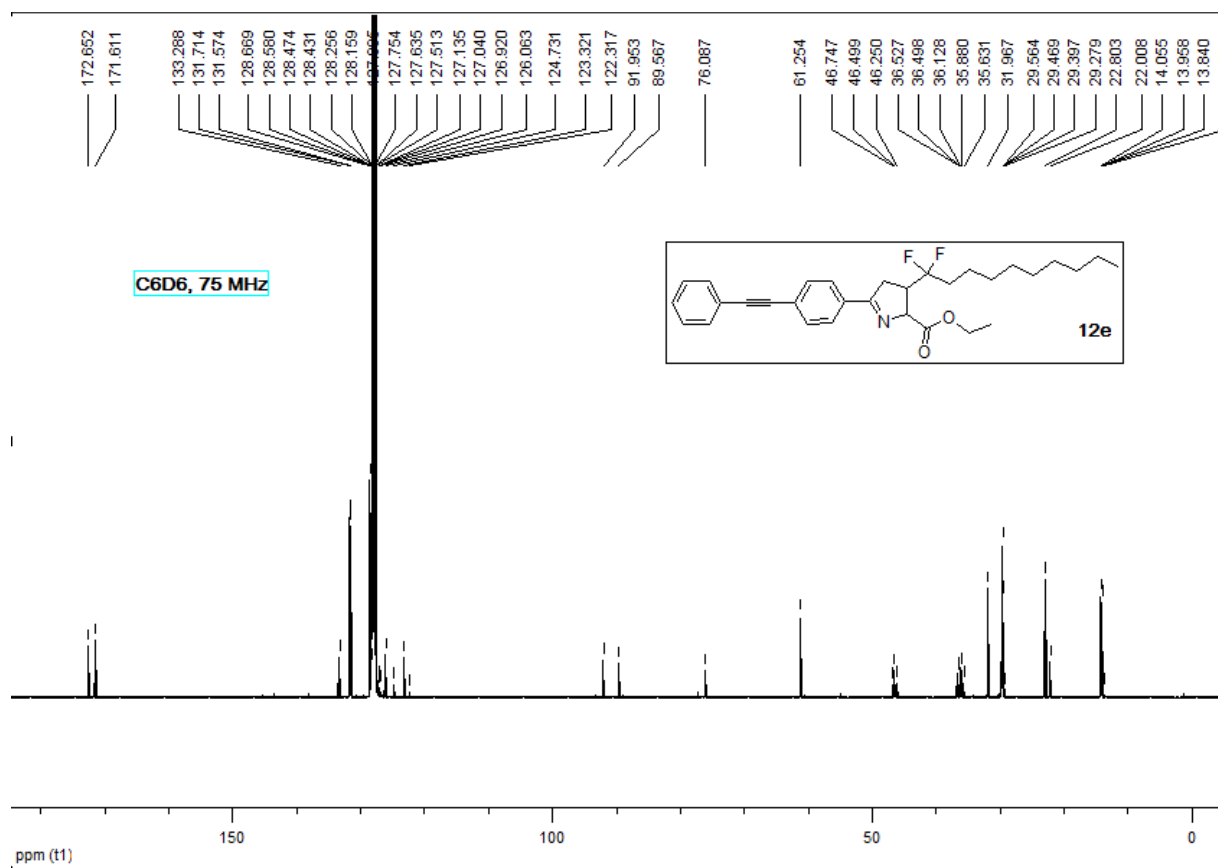

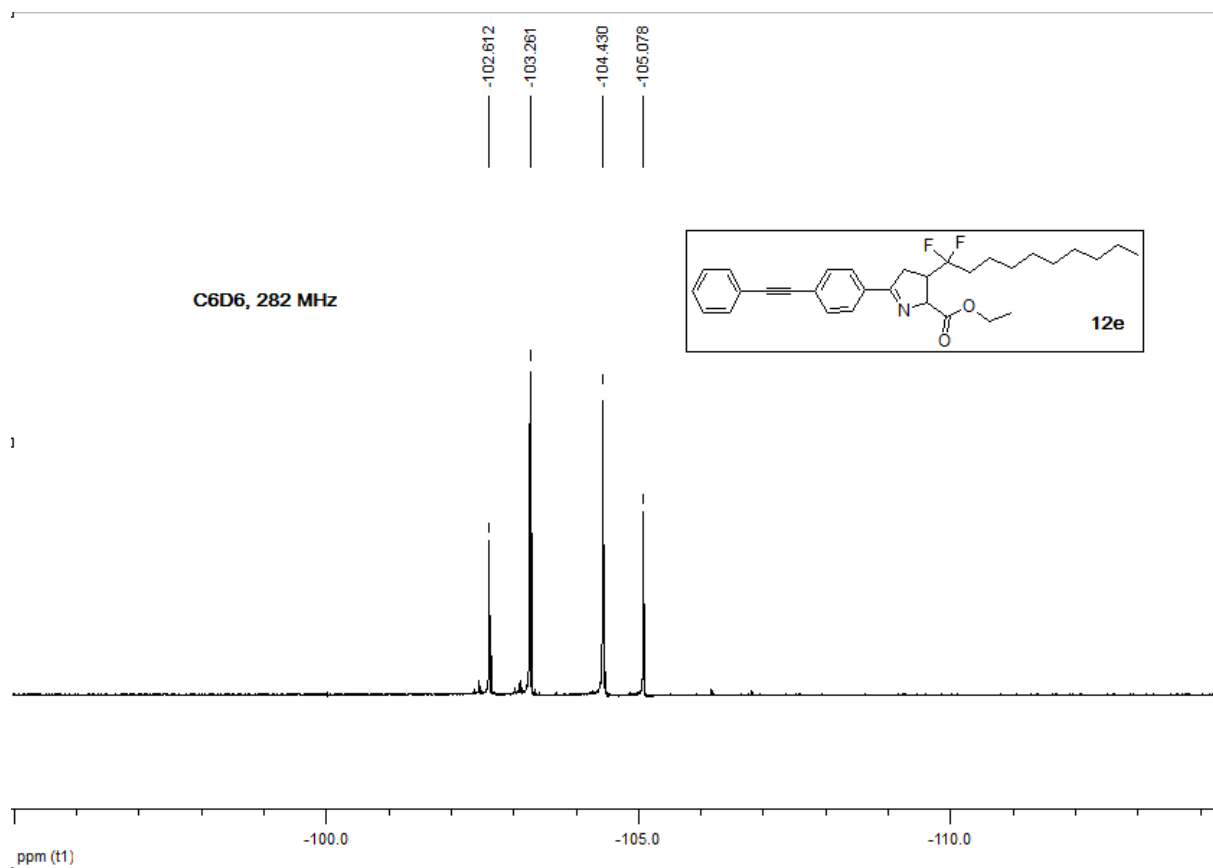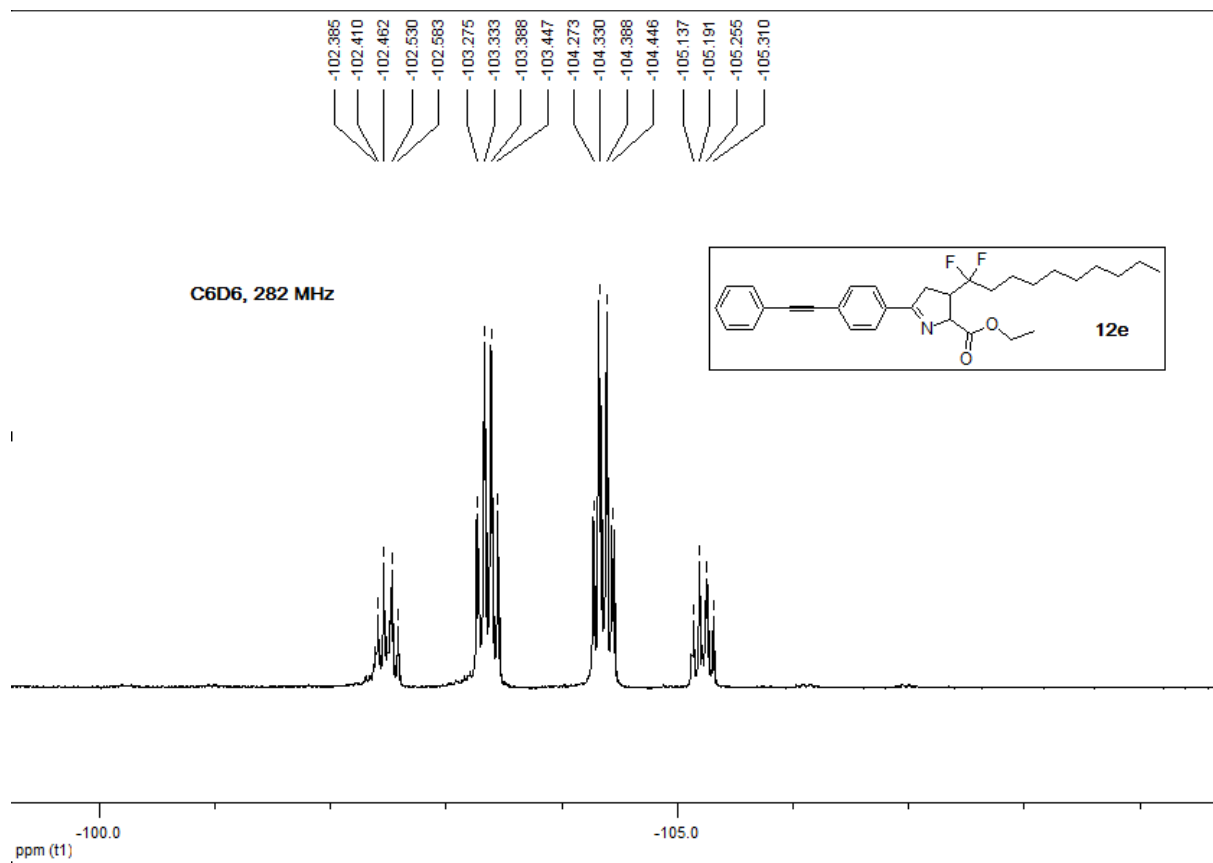

Supplement: Additional file 1 [file 1860-5397-9-230-S1.pdf]
